# Supplementary material for: End-to-End Bent Perylene Bisimide Cyclophanes by Double Sulfur Extrusion
Source: PubMed Central journal article supplement (PMC11177258; doi:10.1021/jacs.4c05358), 2024-05-30
Supplement: ja4c05358_si_001.pdf [file ja4c05358_si_001.pdf]

## Supporting Information

### End-to-End Bent Perylene Bisimide Cyclophanes by Double Sulfur Extrusion

Yuki Tanaka,<sup>1</sup> Keita Tajima,<sup>1</sup> Ryota Kusumoto,<sup>2</sup> Yasuhiro Kobori,<sup>2,3,4\*</sup> Norihito Fukui,<sup>1,4\*</sup>  
and Hiroshi Shinokubo<sup>1\*</sup>

<sup>1</sup>Department of Molecular and Macromolecular Chemistry, Graduate School of Engineering, Nagoya University, Furo-cho, Chikusa-ku, Nagoya, Aichi 464-8603, Japan

<sup>2</sup> Department of Chemistry, Graduate School of Science, Kobe University, 1-1, Rokkodai-cho, Nada-ku, Kobe 657-8501, Japan.

<sup>3</sup> Molecular Photoscience Research Center, Kobe University, 1-1, Rokkodai-cho, Nada-ku, Kobe 657-8501, Japan.

<sup>4</sup> CREST, JST, Honcho 4-1-8, Kawaguchi, Saitama 332-0012, Japan.

<sup>5</sup> PRESTO, Japan Science and Technology Agency (JST), Kawaguchi, Saitama 332-0012, Japan

E-mail: ykobori@kitty.kobe-u.ac.jp, fukui@chembio.nagoya-u.ac.jp, hshino@chembio.nagoya-u.ac.jp

## Table of Contents

|                                                    |    |
|----------------------------------------------------|----|
| 1. Instrumentation and materials .....             | 3  |
| 2. Experimental procedures and compound data ..... | 4  |
| 3. NMR spectra .....                               | 13 |
| 4. Mass spectra .....                              | 38 |
| 5. Crystal data.....                               | 51 |
| 6. Electrochemical properties .....                | 53 |
| 7. Thermal analysis .....                          | 55 |
| 8. DFT Calculations .....                          | 56 |
| 9. Photophysical properties .....                  | 74 |
| 10. References .....                               | 77 |

## 1. Instrumentation and materials

---

$^1\text{H}$  NMR (500 MHz) and  $^{13}\text{C}$  NMR (126 MHz) spectra were recorded on a Bruker AVANCE III HD spectrometer.  $^1\text{H}$  NMR (600 MHz) and  $^{13}\text{C}$  NMR (151 MHz) spectra were recorded on a JEOL JNM-ECA600II spectrometer. Chemical shifts were reported as the delta scale in ppm relative to solvent residual signals of  $\text{CDCl}_3$  ( $\delta = 7.26$  ppm),  $\text{DMSO-}d_6$  ( $\delta = 2.50$  ppm), and 1,1,2,2-tetrachloroethane- $d_2$  ( $\delta = 6.0$  ppm) for  $^1\text{H}$  NMR and  $\text{CDCl}_3$  ( $\delta = 77.16$  ppm),  $\text{DMSO-}d_6$  ( $\delta = 39.52$  ppm), and 1,1,2,2-tetrachloroethane- $d_2$  ( $\delta = 74.00$  ppm) for  $^{13}\text{C}$  NMR. UV/vis/NIR absorption spectra were recorded on a Shimadzu UV-2550 or JASCP V 770 spectrometer. Emission spectra were recorded on a Jasco FP-8550 spectrometer and absolute fluorescence quantum yields were measured by the photon-counting method using an integration sphere. Thermogravimetric analyses were recorded on a NETZSCH STA Regulus. Preparative separations were performed by silica gel column chromatography (Wako gel<sup>®</sup> C-300 or C-400). High-resolution atmospheric pressure chemical ionization time-of-flight (APCI-TOF) mass spectra were taken on a Bruker micrOTOF instrument. X-ray data were obtained using a Rigaku CCD diffractometer (Saturn 724 with MicroMax-007) with Varimax Mo optics. Cyclic voltammograms were obtained under the following conditions: solvent:  $\text{CH}_2\text{Cl}_2$ , electrolyte: 0.1 M  $\text{Bu}_4\text{NPF}_6$ , working electrode: glassy carbon, counter electrode: Pt, reference electrode:  $\text{Ag}/\text{AgNO}_3$ , scan rate: 0.05 V/s. Photo-irradiation was conducted by the USHIO OPM2-252HQ lamp house equipped with a super-high pressure mercury lamp (250 W) and an ASAHI SPECTRA LU0350 cut filter (cut range:  $\lambda < 350$  nm) or L38 cut filter (cut range:  $\lambda < 380$  nm).

All calculations were carried out using the Gaussian 16 software package.<sup>1</sup> Initial geometries of **5a**, **5b**, and **5c** were obtained from the X-ray crystal structure. Density functional theory (DFT) calculations were conducted with the restricted B3LYP<sup>2</sup> level, employing basis sets 6-31G(d).

Dry DMF was purchased from Wako Pure Chemical Industries, Ltd. as a dehydrated grade. Compounds **9** and **12** were prepared according to the literature.<sup>3,4</sup> Unless otherwise noted, materials obtained from commercial suppliers were used without further purification.

## 2. Experimental procedures and compound data

---

### 2,6-Dimethylphenyl DNDTBI *S*-oxide **10**

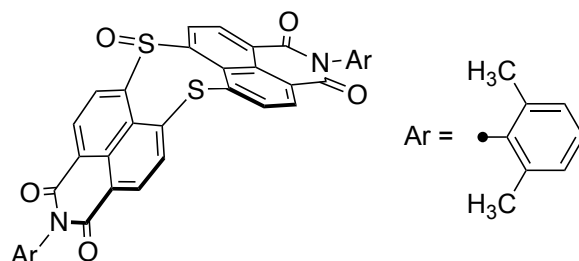

Compound **9** (66 mg, 0.10 mmol) and  $\text{CH}_2\text{Cl}_2$  (5.0 mL) were placed in a round-bottom flask and cooled to 0 °C. To the flask, *m*-CPBA (containing ca. 30 wt% water, 29 mg, 0.12 mmol) was added, and the mixture was stirred for 1 h at 0 °C. The mixture was allowed to warm to room temperature and stirred for 1 h. After the reaction, the solution was separated by silica gel column chromatography (eluent:  $\text{CH}_2\text{Cl}_2$ /ethyl acetate = 30/1). After removal of the solvent in vacuo, recrystallization from  $\text{CH}_2\text{Cl}_2$ / $\text{CH}_3\text{OH}$  afforded **10** (50 mg, 74  $\mu\text{mol}$ , 74%) as a yellow solid.

$^1\text{H}$  NMR (500 MHz,  $\text{DMSO}-d_6$ , 298 K):  $\delta$  = 8.79 (d,  $J$  = 8.0 Hz, 2H), 8.76 (d,  $J$  = 8.0 Hz, 2H), 8.62 (d,  $J$  = 7.7 Hz, 2H), 8.58 (d,  $J$  = 7.7 Hz, 2H), 7.27 (t,  $J$  = 7.5 Hz, 2H), 7.22 (d,  $J$  = 7.2 Hz, 2H), 7.17 (d,  $J$  = 7.3 Hz, 2H), 2.02 (s, 6H), 1.88 (s, 6H) ppm;  $^{13}\text{C}$  NMR (126 MHz,  $\text{DMSO}-d_6$ , 298 K):  $\delta$  = 161.9, 161.8, 153.4, 138.0, 137.2, 135.42, 135.37, 133.5, 131.9, 130.2, 128.6, 128.2, 124.25, 124.19, 123.6, 17.3, 17.2 ppm (Three signals due to  $\text{sp}^2$  carbon are missing due to overlapping.); HRMS (APCI):  $[\text{M}+\text{H}]^+$  Calcd for  $\text{C}_{40}\text{H}_{27}\text{N}_2\text{O}_5\text{S}_2$  679.1356; Found 679.1332.

### 2,6-Dimethylphenyl DNDTBI *S,S'*-dioxide **11**

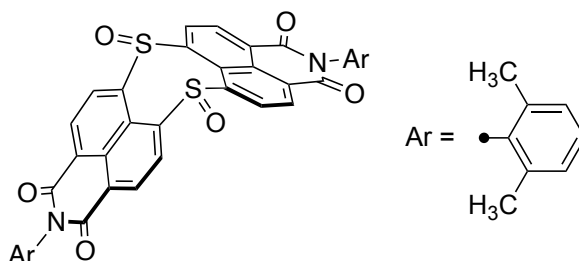

Compound **9** (66 mg, 0.10 mmol),  $\text{Na}_2\text{WO}_4 \cdot 2\text{H}_2\text{O}$  (6.6 mg, 20  $\mu\text{mol}$ ), phenylphosphonic acid (3.2 mg, 20  $\mu\text{mol}$ ),  $\text{MeN}(\text{Oct})_3 \cdot \text{HSO}_4$  (9.3 mg, 20  $\mu\text{mol}$ ), toluene (2.5 mL), and  $\text{H}_2\text{O}_2$  aq. (ca. 30

wt%, 1.0 mL, ca. 9 mmol) were placed in a round-bottom flask. The mixture was stirred under light-shielded conditions for 16 h at 80 °C. After the reaction, the mixture was cooled to room temperature and extracted with water and CH<sub>2</sub>Cl<sub>2</sub>. The organic layer was dried over Na<sub>2</sub>SO<sub>4</sub>. After removal of the solvent in vacuo, recrystallization from CH<sub>2</sub>Cl<sub>2</sub>/CH<sub>3</sub>OH afforded **11** (50 mg, 73 μmol, 73%) as a yellow solid.

<sup>1</sup>H NMR (500 MHz, DMSO-*d*<sub>6</sub>, 298 K): δ = 8.78 (d, *J* = 8.0 Hz, 4H), 8.65 (d, *J* = 8.1 Hz, 4H), 7.27 (t, *J* = 7.5 Hz, 2H), 7.21 (d, *J* = 7.2 Hz, 2H), 7.17 (d, *J* = 7.3 Hz, 2H), 2.02 (s, 6H), 1.88 (s, 6H) ppm; <sup>13</sup>C NMR (126 MHz, DMSO-*d*<sub>6</sub>, 298 K): δ = 161.7, 151.2, 135.4 (overlap), 133.4, 132.0, 129.8, 128.6 (overlap), 128.2, 124.8, 122.6, 122.1, 17.4, 17.3 ppm; HRMS (APCI): [M+H]<sup>+</sup> Calcd for C<sub>40</sub>H<sub>27</sub>N<sub>2</sub>O<sub>6</sub>S<sub>2</sub> 695.1305; Found 695.1294.

### *o*-Anisyl DNDTBI **13**

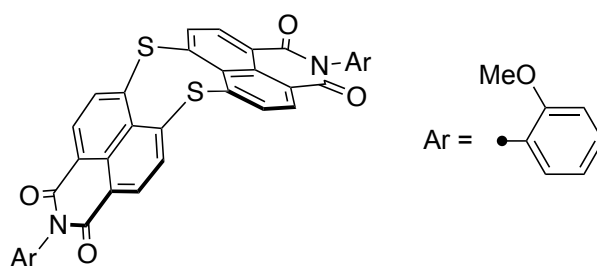

Compound **12** (1.8 g, 4.9 mmol) and DMF (0.40 L) were placed in a round-bottom flask. To the flask, Na<sub>2</sub>S (0.70 g, 9.0 mmol) was added. The mixture was stirred for 3 h at room temperature. After the reaction was completed, 1 M HCl aq. was added. After removal of the solvent in vacuo, the residue was collected by filtration. The solid was washed with water, methanol, and Et<sub>2</sub>O, affording a brown solid (1.2 g). The obtained brown solid (1.2 g), propionic acid (14 mL), *N*-methylpyrrolidone (NMP, 14 mL), and *o*-anisidine (2.8 mL, 25 mmol) were placed in a round-bottom flask, and the mixture was refluxed for 3 h at 170 °C. After the reaction mixture was cooled to room temperature, water was added to the mixture. The precipitate was filtered and washed with CH<sub>3</sub>OH and Et<sub>2</sub>O. The solid was dissolved in CH<sub>2</sub>Cl<sub>2</sub>, and insoluble yellow solids were removed by filtration. The filtrate was purified by silica gel column chromatography (eluent: CH<sub>2</sub>Cl<sub>2</sub>) to afford **13** (0.20 g, 0.30 mmol, 12%) as a yellow solid. Compound **13** was obtained as the mixture of the rotational isomers due to the *o*-anisyl groups.

<sup>1</sup>H NMR (500 MHz, DMSO-*d*<sub>6</sub>, 298 K): δ = 8.55–8.45 (m, 8H), 7.49–7.42 (m, 2H), 7.38–7.32 (m, 1H), 7.26–7.13 (m, 3H), 7.13–7.02 (m, 2H), 3.74–3.57 (m, 6H) ppm; HRMS (APCI): [M+H]<sup>+</sup>

Calcd for C<sub>38</sub>H<sub>23</sub>N<sub>2</sub>O<sub>6</sub>S<sub>2</sub> 667.0992; Found 667.0975.

### *o*-Hydroxyphenyl DNDTBI **14**

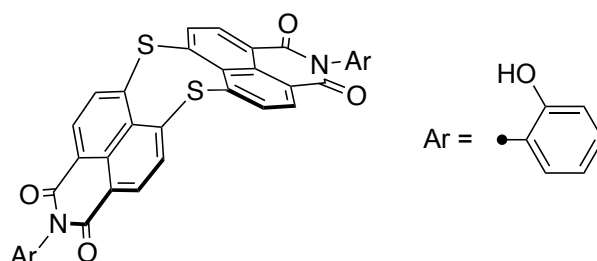

Compound **8** (0.83 g, 1.2 mmol) was placed in a round-bottom flask under argon. To the flask, CH<sub>2</sub>Cl<sub>2</sub> (0.11 L, dried) was added, and the solution was cooled to 0 °C. BBr<sub>3</sub> (ca.1 M CH<sub>2</sub>Cl<sub>2</sub> solution, 15 mL, 15 mmol) was added to the flask under argon. The solution was allowed to warm to room temperature and stirred for 1 h. After the reaction, excess NH<sub>3</sub> aqueous was added. The precipitate was filtered and washed with water and CH<sub>3</sub>OH to afford **14** (0.74 g, 1.2 mmol, 93%) as an orange solid. Compound **14** was obtained as the mixture of the rotational isomers due to the *o*-hydroxyphenyl groups.

<sup>1</sup>H NMR (500 MHz, DMSO-*d*<sub>6</sub>, 298 K): δ = 8.55–8.45 (m, 8H), 7.30–6.80 (m, 8H) ppm; HRMS (APCI): [M+H]<sup>+</sup> Calcd for C<sub>36</sub>H<sub>19</sub>N<sub>2</sub>O<sub>6</sub>S<sub>2</sub> 639.0679; Found 639.0671.

### C5-tethered DNDTIBI **15a**

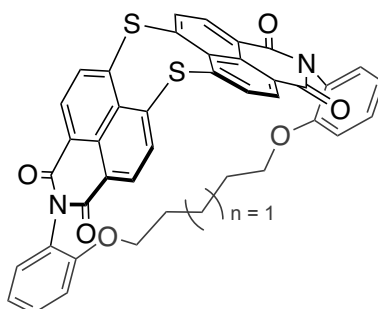

Compound **14** (0.59 g, 0.93 mmol) and K<sub>2</sub>CO<sub>3</sub> (0.32 g, 2.3 mmol) were placed in a round-bottom flask under argon. To the flask, DMF (0.75 L, dried) and 1,5-dibromopentane (0.15 mL, 1.1 mmol) were added under argon, and the solution was stirred for 3 days at 40 °C. After removal of the solvent in vacuo, the residue was extracted with CH<sub>2</sub>Cl<sub>2</sub> and washed with water. The

organic layer was dried over Na<sub>2</sub>SO<sub>4</sub>. After removal of the solvent in vacuo, the residue was separated by silica gel column chromatography (eluent: CH<sub>2</sub>Cl<sub>2</sub>/ethyl acetate = 50/1). After removal of the solvent in vacuo, recrystallization from CH<sub>2</sub>Cl<sub>2</sub>/MeOH afforded **15a** (0.11 g, 0.15 mmol, 17%) as an orange solid.

<sup>1</sup>H NMR (500 MHz, 1,1,2,2-tetrachloroethane-*d*<sub>2</sub>, 298 K):  $\delta$  = 8.48 (d, *J* = 7.7 Hz, 4H), 8.35 (d, *J* = 7.7 Hz, 4H), 7.45–7.41 (m, 4H), 7.14 (t, *J* = 7.5 Hz, 2H), 6.87 (d, *J* = 7.5 Hz, 2H), 3.54 (br, 4H), 0.64 (br, 6H) ppm; <sup>13</sup>C NMR (126 MHz, 1,1,2,2-tetrachloroethane-*d*<sub>2</sub>, 298 K):  $\delta$  = 163.8, 152.7, 142.3, 137.6, 132.4, 131.5, 131.0, 130.5, 130.3, 125.1, 124.0, 120.9, 112.5, 67.0, 29.2, 19.8 ppm; HRMS (APCI): [M+H]<sup>+</sup> Calcd for C<sub>41</sub>H<sub>27</sub>N<sub>2</sub>O<sub>6</sub>S<sub>2</sub> 707.1305; Found 707.1287.

### C6-tethered DNDTIBI **15b**

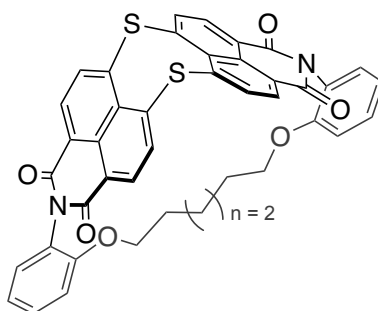

Compound **14** (0.48 g, 0.76 mmol) and K<sub>2</sub>CO<sub>3</sub> (0.26 g, 1.9 mmol) were placed in a round-bottom flask under argon. To the flask, DMF (250 mL, dried) and 1,6-dibromohexane (0.14 mL, 0.91 mmol) were added. The solution was stirred for 3 days at 40 °C. After removal of the solvent in vacuo, the residue was extracted with CH<sub>2</sub>Cl<sub>2</sub> and washed with water. The organic layer was dried over Na<sub>2</sub>SO<sub>4</sub>. After removal of the solvent in vacuo, the residue was separated by silica gel column chromatography (eluent: CH<sub>2</sub>Cl<sub>2</sub>/ethyl acetate = 50/1). After removal of the solvent in vacuo, recrystallization from CH<sub>2</sub>Cl<sub>2</sub>/MeOH afforded **15b** (0.13 g, 0.18 mmol, 24%) as an orange solid.

<sup>1</sup>H NMR (500 MHz, 1,1,2,2-tetrachloroethane-*d*<sub>2</sub>, 298 K):  $\delta$  = 8.49 (d, *J* = 7.7 Hz, 4H), 8.35 (d, *J* = 7.7 Hz, 4H), 7.46 (t, *J* = 8.0 Hz, 2H), 7.35 (dd, *J* = 7.8 Hz, 1.3 Hz, 2H), 7.14 (t, *J* = 8.0 Hz, 2H), 7.01 (d, *J* = 8.0 Hz, 2H), 3.69 (t, *J* = 6.3 Hz, 4H), 1.06 (br, 4H), 0.70 (br, 4H) ppm; <sup>13</sup>C NMR (126 MHz, 1,1,2,2-tetrachloroethane-*d*<sub>2</sub>, 298 K):  $\delta$  = 163.2, 153.8, 142.1, 137.6, 132.4, 131.6, 131.0, 130.5, 130.2, 124.3, 124.0, 121.2, 113.8, 69.3, 28.7, 25.6 ppm; HRMS (APCI): [M+H]<sup>+</sup> Calcd for C<sub>42</sub>H<sub>29</sub>N<sub>2</sub>O<sub>6</sub>S<sub>2</sub> 721.1462; Found 721.1445.

### C7-tethered DNDTIBI **15c**

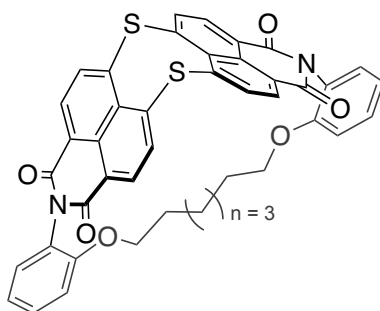

Compound **14** (0.16 g, 0.25 mmol) and  $K_2CO_3$  (84 mg, 0.61 mmol) were placed in a round-bottom flask under argon. To the flask, DMF (200 mL, dried) and 1,7-dibromoheptane (47  $\mu$ L, 0.28 mmol) were added. The solution was stirred for 4 days at 40  $^\circ$ C. After removal of the solvent in vacuo, the residue was extracted with water and  $CH_2Cl_2$ . The organic layer was dried over  $Na_2SO_4$ . After removal of the solvent in vacuo, the residue was separated by silica gel column chromatography (eluent:  $CH_2Cl_2$ /ethyl acetate = 50/1). After removal of the solvent in vacuo, recrystallization from  $CH_2Cl_2$ /hexane afforded **15c** (65 mg, 89  $\mu$ mol, 36%) as an orange solid.

$^1H$  NMR (500 MHz, 1,1,2,2-tetrachloroethane- $d_2$ , 298 K):  $\delta$  = 8.51 (d,  $J$  = 7.7 Hz, 4H), 8.40 (d,  $J$  = 7.7 Hz, 4H), 7.46 (t,  $J$  = 7.2 Hz, 2H), 7.41 (dd,  $J$  = 7.2 Hz, 1.2 Hz, 2H), 7.15 (t,  $J$  = 7.2 Hz, 2H), 6.95 (d,  $J$  = 7.2 Hz, 2H), 3.68 (t,  $J$  = 4.8 Hz, 4H), 1.01 (q,  $J$  = 4.8 Hz, 4H), 0.34 (q,  $J$  = 4.8 Hz, 4H), -0.39 (q,  $J$  = 4.8 Hz, 4H) ppm;  $^{13}C$  NMR (126 MHz, 1,1,2,2-tetrachloroethane- $d_2$ , 298 K):  $\delta$  = 163.6, 153.2, 141.6, 137.6, 132.5, 131.5, 130.8, 130.6, 130.1, 124.8, 124.2, 121.0, 113.1, 67.6, 28.6, 27.6, 22.7 ppm; HRMS (APCI):  $[M+H]^+$  Calcd for  $C_{43}H_{31}N_2O_6S_2$  735.1618; Found 735.1587.

### C5-tethered DNDTIBI $S,S'$ -dioxide **4a**

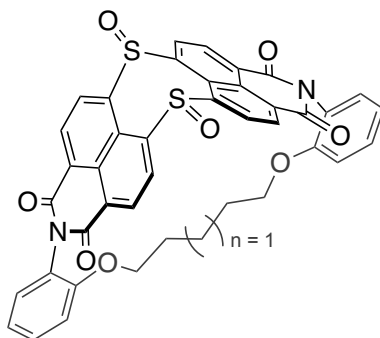



Compound **15a** (83 mg, 0.12 mmol), Na<sub>2</sub>WO<sub>4</sub>·2H<sub>2</sub>O (39 mg, 0.12 mmol), phenylphosphonic acid (19 mg, 0.12 mmol), MeN(Oct)<sub>3</sub>·HSO<sub>4</sub> (55 mg, 0.12 mmol), toluene (80 mL), and H<sub>2</sub>O<sub>2</sub> aq. (ca. 30wt%, 10 mL, 8.8 mmol) were placed in a round-bottom flask. The mixture was stirred under light-shielded conditions for 23 h at 80 °C. The mixture was cooled to room temperature. After removal of the solvent in vacuo, the residue was extracted with CH<sub>2</sub>Cl<sub>2</sub> and washed with water. The organic layer was dried over Na<sub>2</sub>SO<sub>4</sub>. After removal of the solvent in vacuo, the residue was separated by silica gel column chromatography (eluent: CH<sub>2</sub>Cl<sub>2</sub>/ethyl acetate = 10/1). After removal of the solvent in vacuo, the solid material was washed with CH<sub>2</sub>Cl<sub>2</sub> (ca. 3 mL), affording **4a** (78 mg, 0.11 mmol, 90%) as a pink solid.

<sup>1</sup>H NMR (600 MHz, 1,1,2,2-tetrachloroethane-*d*<sub>2</sub>, 298 K): δ = 8.73 (d, *J* = 8.2 Hz, 4H), 8.65 (d, *J* = 8.2 Hz, 4H), 7.46 (td, *J*<sub>1</sub> = 7.7 Hz, *J*<sub>2</sub> = 1.2 Hz, 2H), 7.39 (dd, *J*<sub>1</sub> = 7.6 Hz, *J*<sub>2</sub> = 1.4 Hz, 2H), 7.15 (t, *J* = 7.8 Hz, 2H), 6.90 (d, *J* = 7.8 Hz, 2H), 3.59 (t, *J* = 6.9 Hz, 4H), 0.77 (quin, *J* = 6.9 Hz, 4H), 0.60 (quin, *J* = 6.9 Hz, 2H) ppm; <sup>13</sup>C NMR (150 MHz, 1,1,2,2-tetrachloroethane-*d*<sub>2</sub>, 298 K): δ = 162.8, 152.8, 151.3, 132.3, 130.8, 130.1, 130.0, 125.4, 124.2, 122.0, 121.5, 121.0, 112.5, 66.4, 28.4, 19.3 ppm; HRMS (APCI): [M+H]<sup>+</sup> Calcd for C<sub>41</sub>H<sub>27</sub>N<sub>2</sub>O<sub>8</sub>S<sub>2</sub> 739.1203; Found 739.1196.

#### C6-tethered DNDTIBI *S,S'*-dioxide **4b**

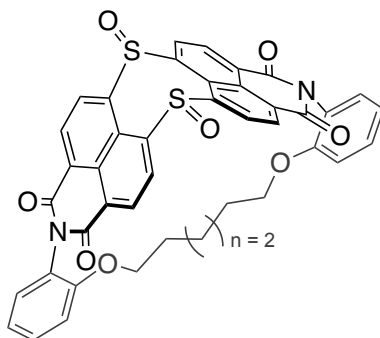

Compound **15b** (0.10 g, 0.14 mmol), Na<sub>2</sub>WO<sub>4</sub>·2H<sub>2</sub>O (46 mg, 0.14 mmol), phenylphosphonic acid (22 mg, 0.14 mmol), MeN(Oct)<sub>3</sub>·HSO<sub>4</sub> (65 mg, 0.14 mmol), toluene (95 mL), and H<sub>2</sub>O<sub>2</sub> aq. (ca. 30wt%, 12 mL, 11 mmol) were placed in a round-bottom flask. The mixture was stirred under light-shielded conditions for 22 h at 80 °C. The mixture was cooled to room temperature. After removal of the solvent in vacuo, the residue was extracted with CH<sub>2</sub>Cl<sub>2</sub> and washed with water. The organic layer was dried over Na<sub>2</sub>SO<sub>4</sub>. After removal of the solvent in vacuo, the residue was separated by silica gel column chromatography (eluent: CH<sub>2</sub>Cl<sub>2</sub>/ethyl acetate = 20/1). After

removal of the solvent in vacuo, recrystallization from CH<sub>2</sub>Cl<sub>2</sub>/MeOH afforded **4b** (64 mg, 85 μmol, 61%) as a pink solid.

<sup>1</sup>H NMR (500 MHz, 1,1,2,2-tetrachloroethane-*d*<sub>2</sub>, 298 K): δ = 8.75 (d, *J* = 7.9 Hz, 4H), 8.67 (d, *J* = 7.9 Hz, 4H), 7.48 (td, *J*<sub>1</sub> = 7.8 Hz, *J*<sub>2</sub> = 1.6 Hz, 2H), 7.31 (dd, *J*<sub>1</sub> = 7.8 Hz, *J*<sub>2</sub> = 1.6 Hz, 2H), 7.15 (td, *J*<sub>1</sub> = 7.8 Hz, *J*<sub>2</sub> = 1.6 Hz, 2H), 7.03 (d, *J* = 7.8 Hz, 2H), 3.72 (t, *J* = 6.4 Hz, 4H), 1.13 (br, 4H), 0.78 (br, 4H) ppm; <sup>13</sup>C NMR (126 MHz, 1,1,2,2-tetrachloroethane-*d*<sub>2</sub>, 298 K): δ = 162.3, 153.8, 151.0, 132.4, 130.8, 130.0, 129.9, 125.4, 123.7, 122.2, 121.7, 121.2, 113.6, 69.1, 28.6, 25.4 ppm; HRMS (APCI): [M+H]<sup>+</sup> Calcd for C<sub>42</sub>H<sub>29</sub>N<sub>2</sub>O<sub>8</sub>S<sub>2</sub> 753.1360; Found 753.1356.

#### C7-tethered DNDTIBI *S,S'*-dioxide **4c**

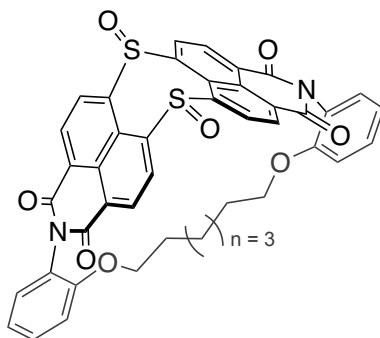

Compound **15c** (25 mg, 34 μmol), Na<sub>2</sub>WO<sub>4</sub>·2H<sub>2</sub>O (13 mg, 40 μmol), phenylphosphonic acid (5.0 mg, 32 μmol), MeN(Oct)<sub>3</sub>·HSO<sub>4</sub> (15 mg, 32 μmol), toluene (23 mL), and H<sub>2</sub>O<sub>2</sub> aq. (ca. 30wt%, 4 mL, 2.8 mmol) were placed in a round-bottom flask. The mixture was stirred under light-shielded conditions for 23 h at 80 °C. After the reaction, the mixture was cooled to room temperature and extracted with water and CH<sub>2</sub>Cl<sub>2</sub>. The organic layer was dried over Na<sub>2</sub>SO<sub>4</sub>. After removal of the solvent in vacuo, the residue was separated by silica gel column chromatography (eluent: from CH<sub>2</sub>Cl<sub>2</sub> to CH<sub>2</sub>Cl<sub>2</sub>/ethyl acetate = 25/1). After removal of the solvent in vacuo, recrystallization from CH<sub>2</sub>Cl<sub>2</sub>/hexane afforded **4c** (13 mg, 17 μmol, 49%) as a pink solid.

<sup>1</sup>H NMR (500 MHz, CDCl<sub>3</sub>, 298 K): δ = 8.85 (d, *J* = 8.0 Hz, 4H), 8.71 (d, *J* = 8.0 Hz, 4H), 7.42 (td, *J*<sub>1</sub> = 7.5 Hz, *J*<sub>2</sub> = 1.8 Hz, 2H), 7.31 (dd, *J*<sub>1</sub> = 7.5 Hz, *J*<sub>2</sub> = 1.8 Hz, 2H), 7.10 (t, *J* = 7.5 Hz, 2H), 6.95 (d, *J* = 7.5 Hz, 2H), 3.77 (t, *J* = 5.5 Hz, 4H), 1.30–1.10 (m, 4H), 0.64 (quin, *J* = 7.5 Hz, 4H), 0.29 (quin, *J* = 7.5 Hz, 2H) ppm; <sup>13</sup>C NMR (126 MHz, CDCl<sub>3</sub>, 298 K): δ = 162.5, 153.9, 150.7, 132.2, 130.8, 130.3, 129.9, 126.0, 124.0, 122.6, 122.4, 121.2, 113.6, 68.6, 29.4, 29.0, 24.2 ppm; HRMS (APCI): [M+H]<sup>+</sup> Calcd for C<sub>43</sub>H<sub>31</sub>N<sub>2</sub>O<sub>8</sub>S<sub>2</sub> 767.1516; Found 767.1480.

### C5-tethered PBIphane 5a

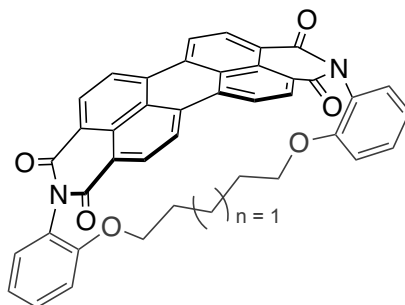

Compound **4a** (7.2 mg, 9.8  $\mu\text{mol}$ ) and  $\text{CH}_2\text{Cl}_2$  (0.10 L) were placed in a round-bottom flask. The mixture was stirred under photo irradiation ( $\lambda > 350$  nm) for 2 h at room temperature. The crude mixture was directly loaded on silica gel column pre-eluted with  $\text{CH}_2\text{Cl}_2$ . The mixture was purified by the subsequent elution with  $\text{CH}_2\text{Cl}_2$ /ethyl acetate (33/1 to 20/1). After removal of the solvent in vacuo, recrystallization from  $\text{CH}_2\text{Cl}_2$ /MeOH afforded **5a** (4.2 mg, 6.5  $\mu\text{mol}$ , 67%) as a red solid.

$^1\text{H}$  NMR (500 MHz, 1,1,2,2-tetrachloroethane- $d_2$ , 298 K):  $\delta$  = 8.64 (d,  $J$  = 8.5 Hz, 4H), 8.62 (d,  $J$  = 8.5 Hz, 4H), 7.72 (dd,  $J_1$  = 7.5 Hz,  $J_2$  = 1.5 Hz, 2H), 7.35 (td,  $J_1$  = 7.5 Hz,  $J_2$  = 1.5 Hz, 2H), 7.13 (t,  $J$  = 7.5 Hz, 2H), 6.93 (d,  $J$  = 7.5 Hz, 2H), 3.16 (t,  $J$  = 8.0 Hz, 4H), 0.37 (br, 2H), -0.53 (br, 4H) ppm;  $^{13}\text{C}$  NMR (126 MHz, 1,1,2,2-tetrachloroethane- $d_2$ , 298 K):  $\delta$  = 166.7, 152.3, 135.3, 132.2, 132.0, 131.9, 130.4, 129.3, 127.5, 124.1 (overlap), 120.8, 111.7, 66.8, 29.6, 19.0 ppm; HRMS (APCI):  $[\text{M}+\text{H}]^+$  Calcd for  $\text{C}_{41}\text{H}_{27}\text{N}_2\text{O}_6$  643.1864; Found 643.1881.

### C6-tethered PBIphane 5b

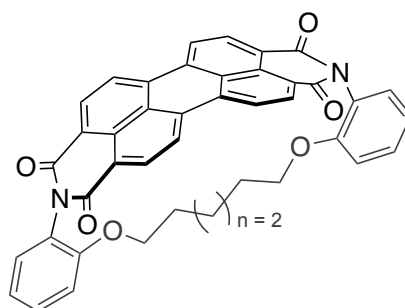

Compound **4b** (7.9 mg, 10  $\mu\text{mol}$ ) and  $\text{CH}_2\text{Cl}_2$  (0.10 L) were placed in a round-bottom flask. The mixture was stirred under photo irradiation ( $\lambda > 350$  nm) for 2 h at room temperature. The

crude mixture was directly loaded on silica gel column pre-eluted with CH<sub>2</sub>Cl<sub>2</sub>. The mixture was purified by the subsequent elution with CH<sub>2</sub>Cl<sub>2</sub>/ethyl acetate (50/1 to 30/1). After removal of the solvent in vacuo, recrystallization from CH<sub>2</sub>Cl<sub>2</sub>/MeOH afforded **5b** (4.9 mg, 7.5 μmol, 71%) as a reddish orange solid.

<sup>1</sup>H NMR (500 MHz, 1,1,2,2-tetrachloroethane-*d*<sub>2</sub>, 298 K): δ = 8.67 (d, *J* = 8.5 Hz, 4H), 8.65 (d, *J* = 8.5 Hz, 4H), 7.72 (d, *J* = 7.5 Hz, 2H), 7.39 (t, *J* = 7.5 Hz, 2H), 7.20 (t, *J* = 7.5 Hz, 2H), 6.85 (d, *J* = 7.5 Hz, 2H), 3.25 (t, *J* = 6.5 Hz, 4H), 0.26 (br, 4H), -0.08 (br, 4H) ppm; <sup>13</sup>C NMR (126 MHz, 1,1,2,2-tetrachloroethane-*d*<sub>2</sub>, 298 K): δ = 165.9, 152.9, 135.0, 131.9, 131.5, 131.3, 130.3, 129.2, 127.0, 123.8, 123.6, 121.7, 115.1, 70.2, 29.6, 26.0 ppm; HRMS (APCI): [M+H]<sup>+</sup> Calcd for C<sub>42</sub>H<sub>29</sub>N<sub>2</sub>O<sub>6</sub> 657.2020; Found 657.1994.

### C7-tethered PBIphane **5c**

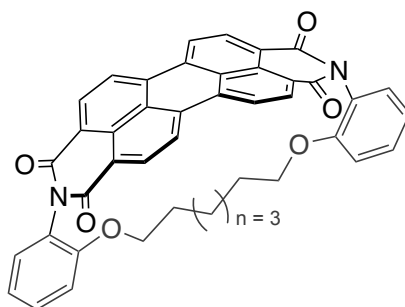

Compound **4c** (7.1 mg, 9.3 μmol) and CH<sub>2</sub>Cl<sub>2</sub> (0.10 L) were placed in a round-bottom flask. The mixture was stirred under photo irradiation ( $\lambda > 350$  nm) for 2 h at room temperature. The crude mixture was directly loaded on silica gel column pre-eluted with CH<sub>2</sub>Cl<sub>2</sub>. The mixture was purified by the subsequent elution with CH<sub>2</sub>Cl<sub>2</sub>/ethyl acetate (30/1 to 20/1). After removal of the solvent in vacuo, recrystallization from CH<sub>2</sub>Cl<sub>2</sub>/MeOH afforded **5c** (5.2 mg, 7.8 μmol, 84%) as an orange solid.

<sup>1</sup>H NMR (600 MHz, 1,1,2,2-tetrachloroethane-*d*<sub>2</sub>, 298 K): δ = 8.71 (d, *J* = 7.8 Hz, 4H), 8.69 (d, *J* = 7.8 Hz, 4H), 7.70 (dd, *J*<sub>1</sub> = 7.8 Hz, *J*<sub>2</sub> = 1.2 Hz, 2H), 7.42 (td, *J*<sub>1</sub> = 7.8 Hz, *J*<sub>2</sub> = 1.2 Hz, 2H), 7.21 (t, *J* = 7.8 Hz, 2H), 6.86 (d, *J* = 7.8 Hz, 2H), 3.35 (t, *J* = 7.2 Hz, 4H), 0.30–0.13 (m, 8H), -0.40 (quin, *J* = 7.2 Hz, 2H) ppm; <sup>13</sup>C NMR (150 MHz, 1,1,2,2-tetrachloroethane-*d*<sub>2</sub>, 298 K): δ = 165.8, 152.6, 135.2, 132.1, 131.4, 131.1, 130.5, 128.9, 127.1, 124.0, 123.9, 121.7, 114.8, 69.3, 32.6, 31.6, 24.3 ppm; HRMS (APCI): [M+H]<sup>+</sup> Calcd for C<sub>43</sub>H<sub>31</sub>N<sub>2</sub>O<sub>6</sub> 671.2177; Found 671.2152.

### 3. NMR spectra

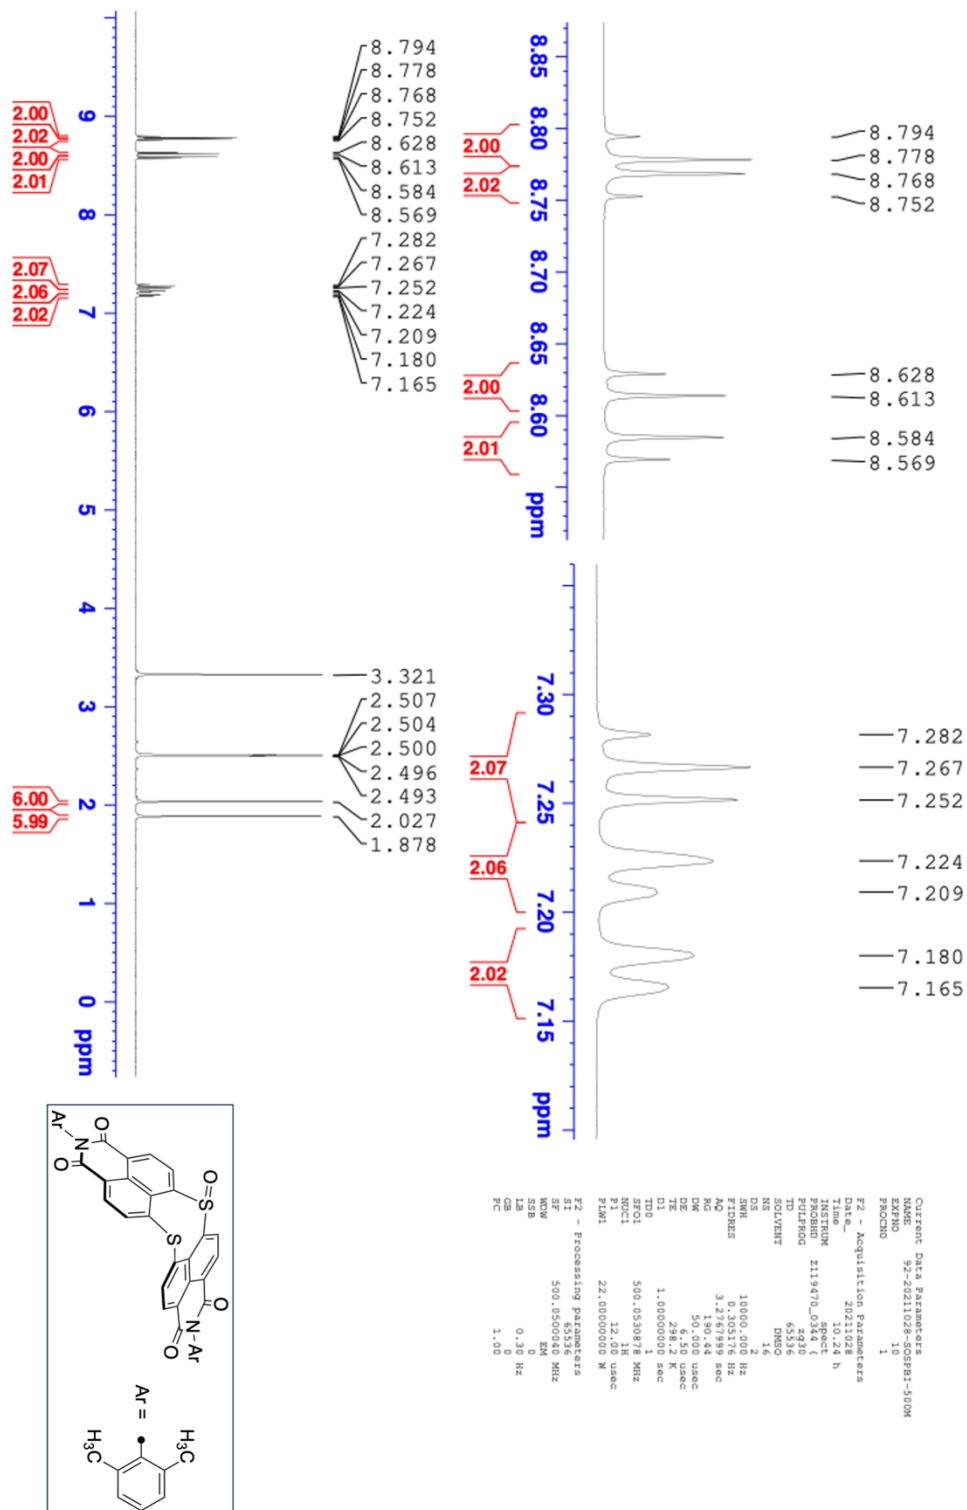

Figure S1. <sup>1</sup>H NMR spectrum of **10** in DMSO-*d*<sub>6</sub> at 25 °C.

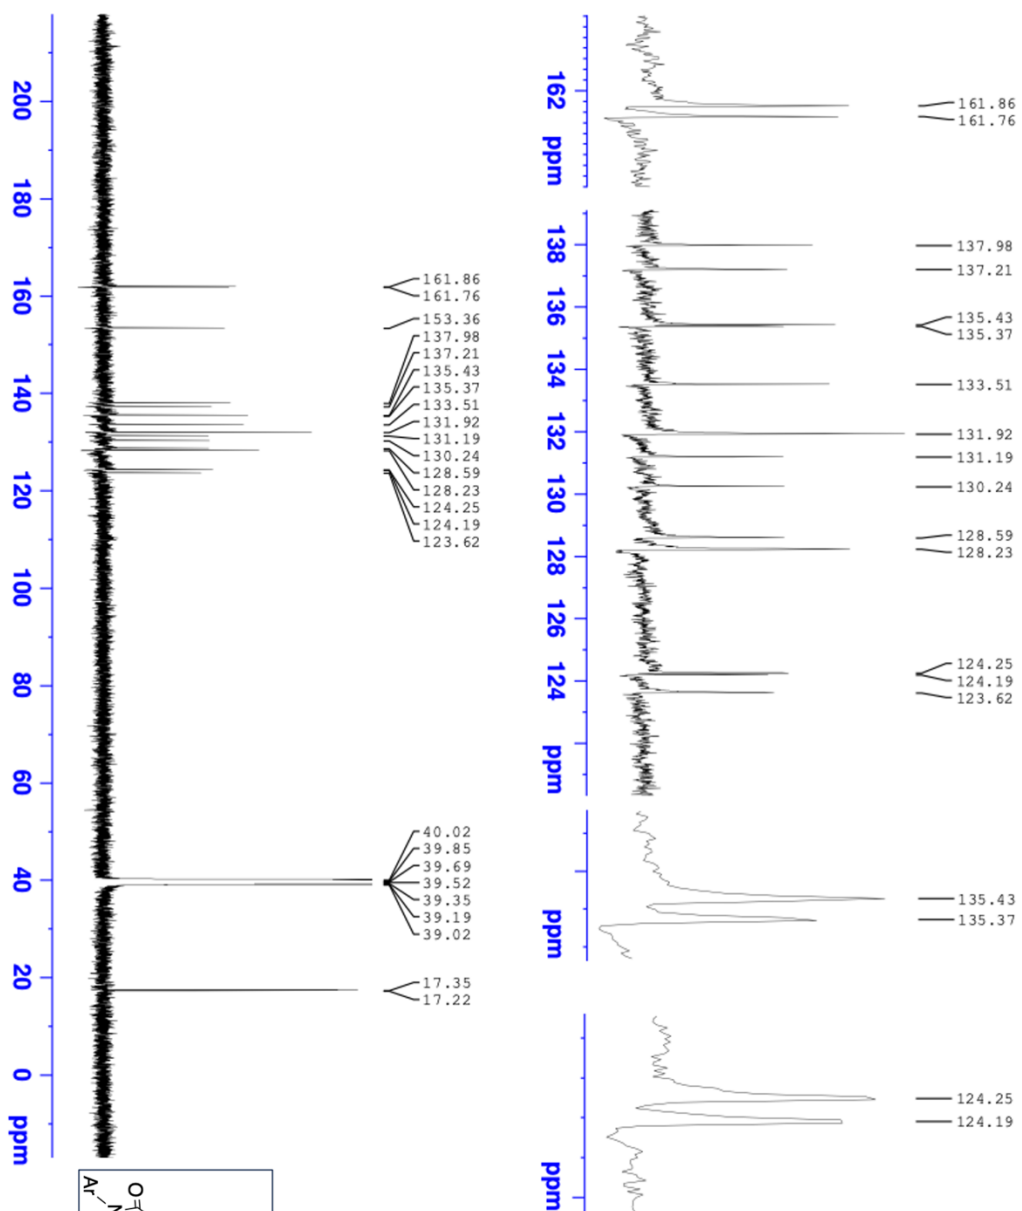

```

NAME          92-20211027-S05-13C
EXPNO         10
PROCNO        1
-----
F2 - Acquisition Parameters
Date_         20211028
Time         3.34 h
INSTRUM      spect
PROBHD       zgpg30
PULPROG      zgpg30
TD            65536
SOLVENT      DMSO
NS            7000
DS            2
SWH           29761.304 Hz
AQ            0.908261 Hz
RG            190.44
DM            8.50 usec
DE            298.1 K
D1            2.00000000 sec
D11           0.03000000 sec
T00           1
T01           1
T02           1
NUC1          13C
NUC2          13C
P1            10.00 usec
PL1           83.00000000 W
SFO2          500.0520002 MHz
RG2           waitzg
PCPD2        80.00 usec
PLM2          22.00000000 W
PLM3          0.49500000 W
PLM13         0.24898000 W
-----
F2 - Processing parameters
SI            32768
SF            125.7377325 MHz
WDW           EM
SSB           0
GB            0
PC            1.40
  
```

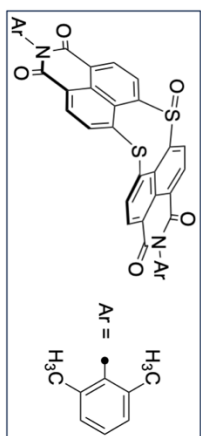

Figure S2. <sup>13</sup>C NMR spectrum of **10** in DMSO-*d*<sub>6</sub> at 25 °C.

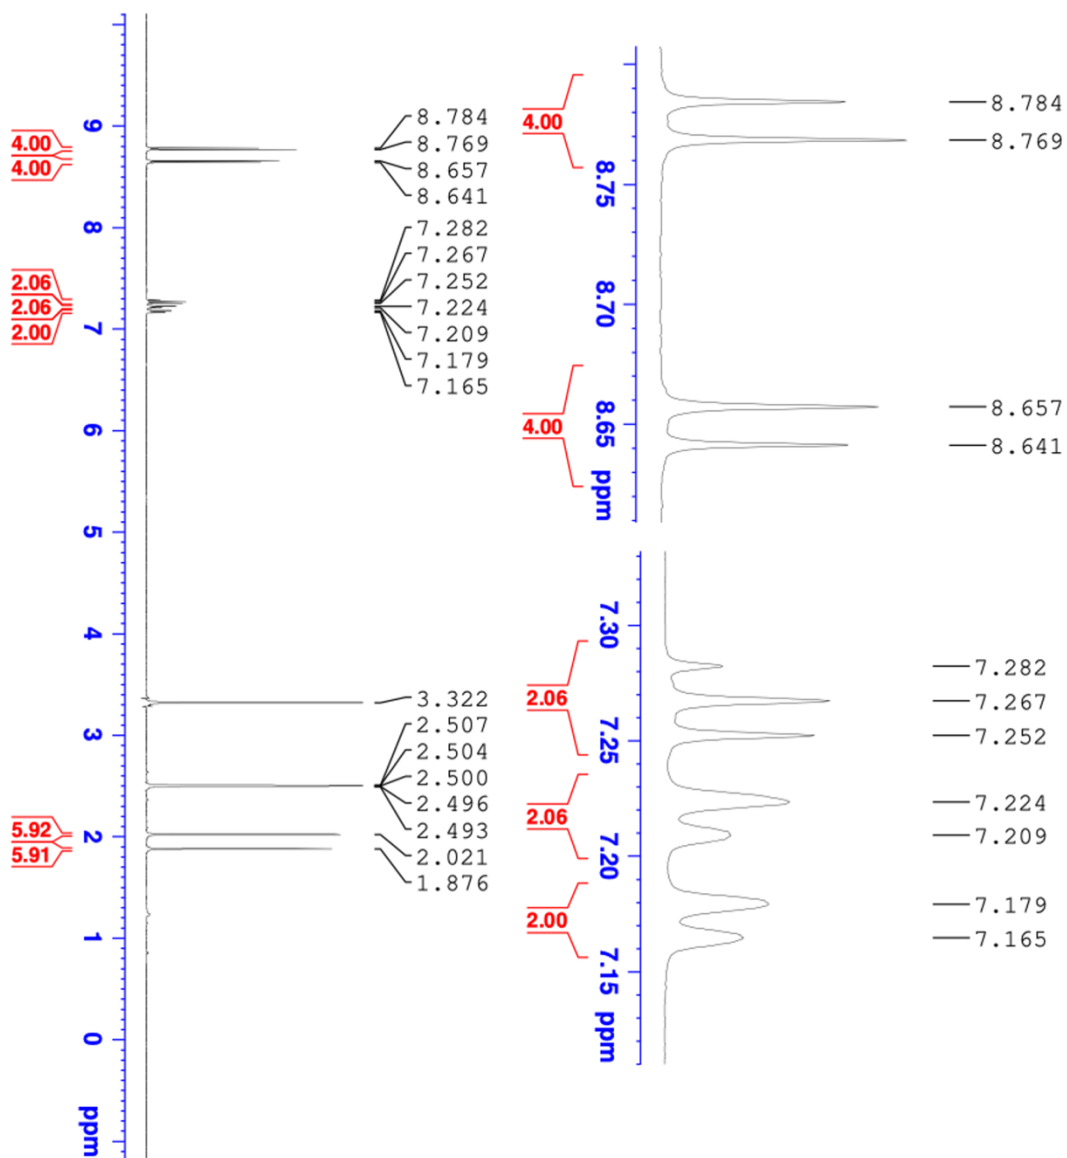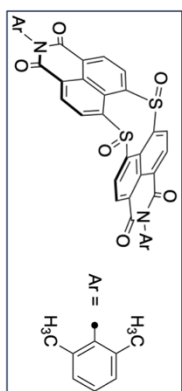

```

Current Data Parameters
NAME          92-20211028-SOSOPRI-500M
EXPNO        10
PROCNO       1
F2 - Acquisition Parameters
Date_         20211028
Time         10.28 h
INSTRUM      spect
PROBHD       2119470_0344 (
PULPROG      zg30
TD           65536
SOLVENT      DMSO
NS           16
DS           2
SWH          10000.000 Hz
FIDRES      0.303106 Hz
AQ          3.274932 sec
RG          490
AQ           50.000 usec
DE          6.50 usec
TE          298.1 K
D1          1.00000000 sec
TD0         1
SFO1        500.0530878 MHz
NUC1         1H
P1          12.00 usec
P1M1        22.00000000 W
F2 - Processing parameters
SI          65536
SF          500.0500041 MHz
RG          EM
SFO         500.1313500 MHz
WDW         EM
SSB         0
LB          0.30 Hz
GB          0
PC          1.00
  
```

Figure S3.  $^1\text{H}$  NMR spectrum of **11** in  $\text{DMSO-}d_6$  at  $25\text{ }^\circ\text{C}$ .

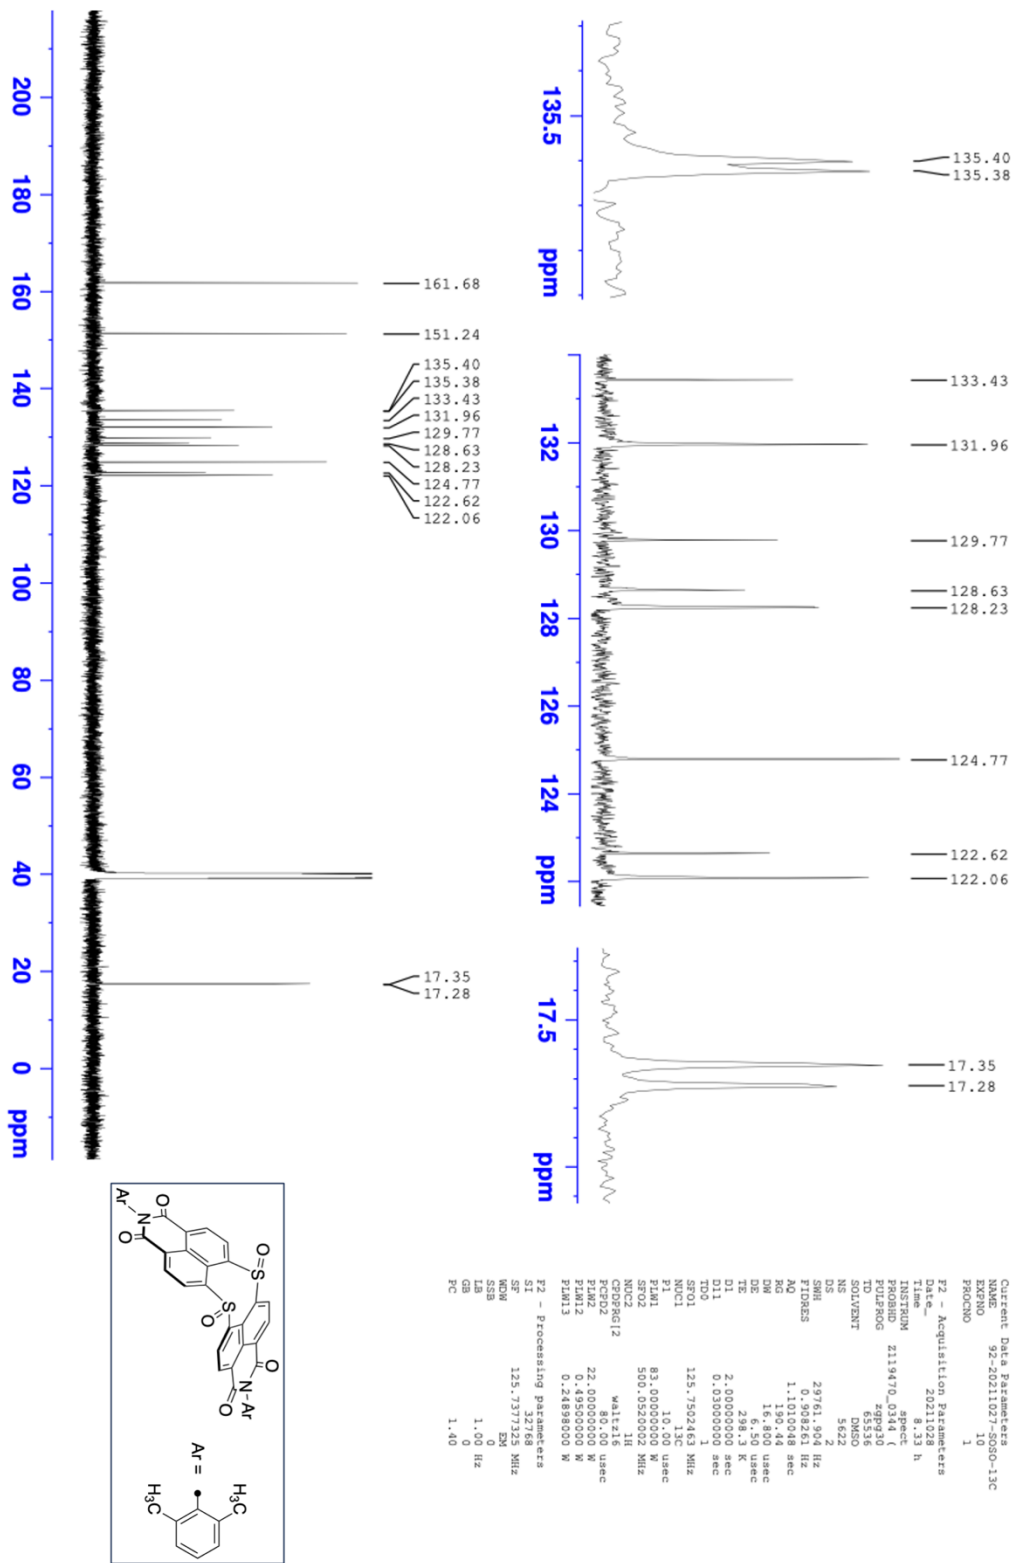

Figure S4. <sup>13</sup>C NMR spectrum of **11** in DMSO-*d*<sub>6</sub> at 25 °C.



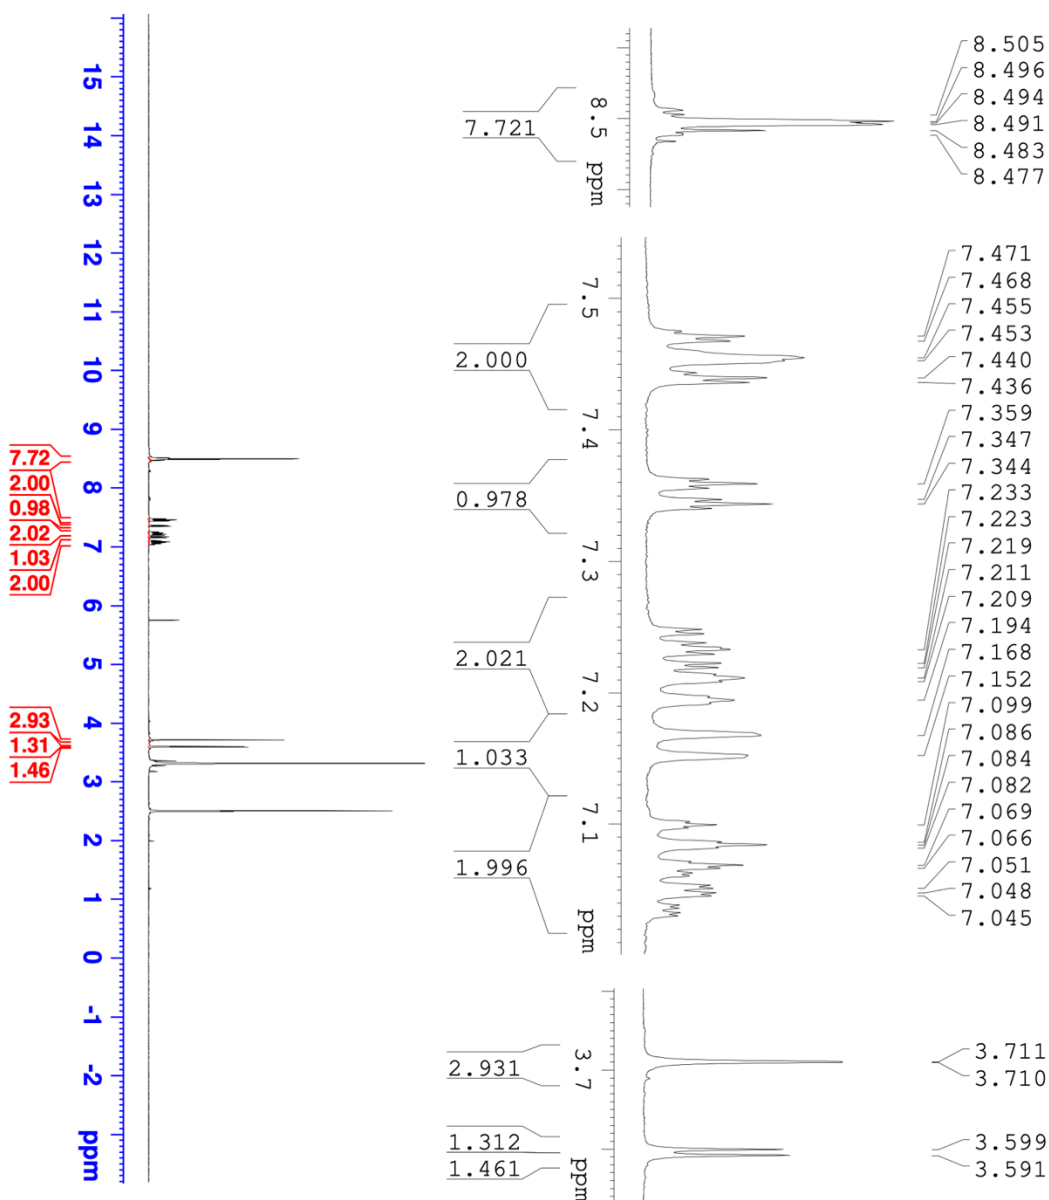

```

Current Data Parameters
NAME      DNDTBI-anisy1-DMSO-1H
EXPNO    10
PROCNO   1

F2 - Acquisition Parameters
Date_    20231012
Time     23.12 h
INSTRUM spect
PROBHD   Z8007_10 (BB0)
PULPROG zg30
TD       65536
SOLVENT  DMSO
NS       16
DS       2
SWH      10000.000 Hz
FIDRES   0.305176 Hz
AQ        3.2767999 sec
RG        194.99
DE        50.000 usec
TE        6.50 usec
D1        305.1 K
TD0       1.000000000 sec
SF01      500.1130882 MHz
NUC1      1H
P1        12.77 usec
PLM1      18.00000000 W

F2 - Processing parameters
SI        65536
SF        500.1100041 MHz
WDW       EM
SSB       0
LB        0.30 Hz
GB        0
PC        1.00

```

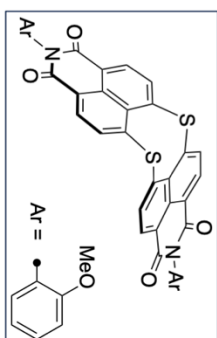

Figure S5.  $^1\text{H}$  NMR spectrum of **13** in  $\text{DMSO-}d_6$  at  $25\text{ }^\circ\text{C}$ .

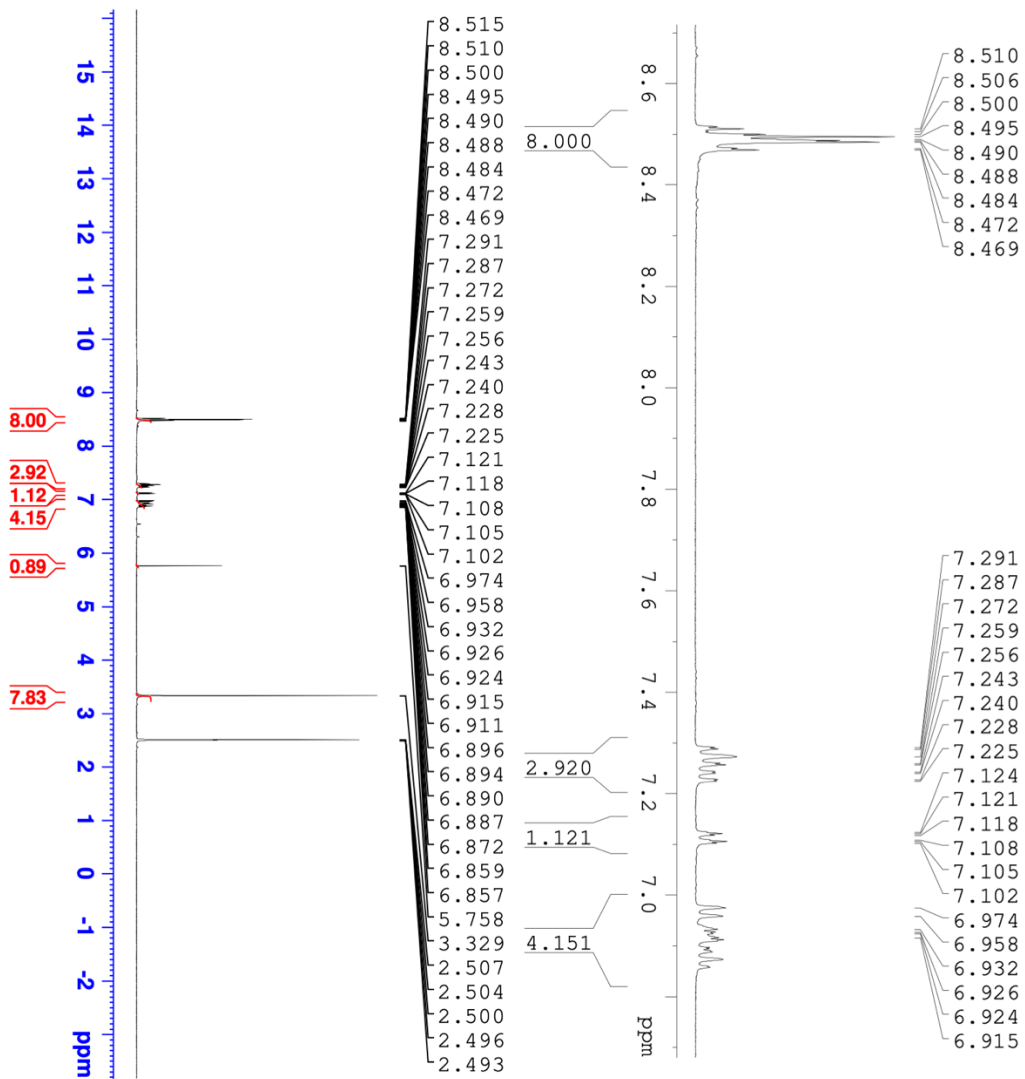

```

Current Data Parameters
NAME      hydroxyphenyl-SS
EXPNO    10
PROCNO    1

F2 - Acquisition Parameters
Date_     20231220
Time      11.39 h
INSTRUM   spect - Copy
PROBHD    28438_10 (DUI)
PULPROG   zg30
TD         65536
SOLVENT   DMSO
NS         16
DS         2
SWH        10000.000 Hz
FIDRES     0.305176 Hz
AQ         3.2767999 sec
RG         194.99
DE         50.000 usec
TE         296.3 K
D1         1.00000000 sec
TD0        1
SF01       500.1130882 MHz
NUC1       1H
P1         11.82 usec
PL1        18.00000000 W

F2 - Processing parameters
SI         65536
SF         500.1100040 MHz
WDW        EM
SSB        0
IB         0.30 Hz
GB         0
PC         1.00
  
```

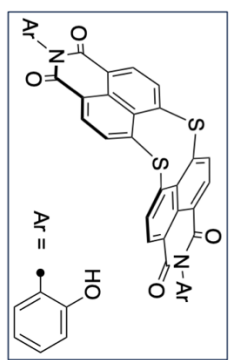

Figure S6. <sup>1</sup>H NMR spectrum of 14 in DMSO-*d*<sub>6</sub> at 25 °C.

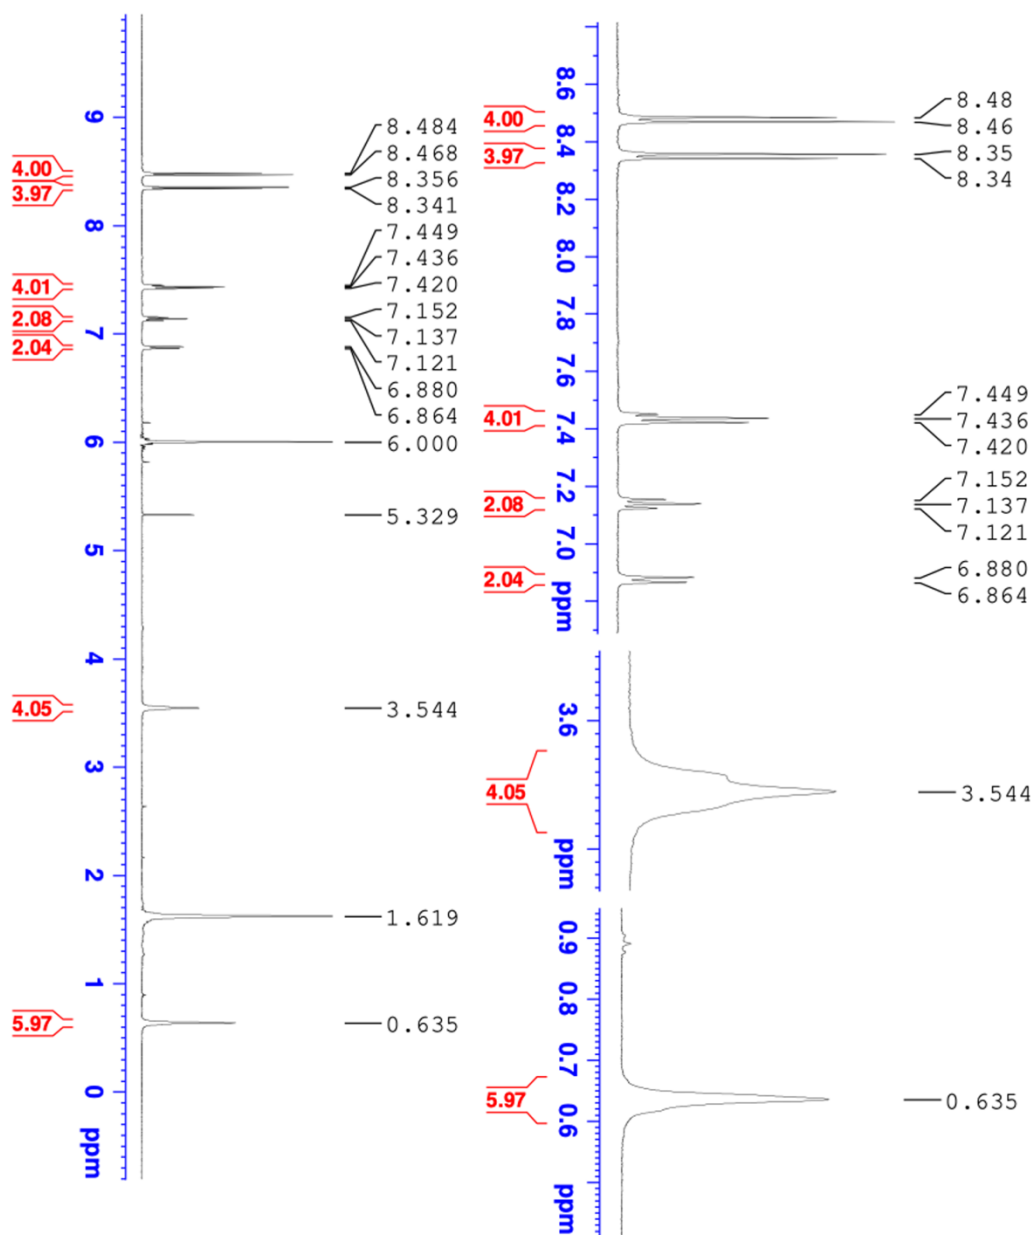

```

Current Data Parameters
NAME          92-2023014-CSONOTRI-11ppb
EXPNO         1
PROCNO        1
F2 - Acquisition Parameters
Date_         2023112
Time          21:12
INSTRUM      spect
PROBHD       2119470.0128 (
PULPROG      zgpg30
TD            65536
SOLVENT      TCE
NS           16
DS           4
SFO1         10000.000 Hz
SFO2         0.3051776 Hz
FIDRES       3.2797999 sec
AQ           50.000 usec
RG           50.000 usec
DE           6.50 usec
TE           298.0 K
T1           1.00000000 sec
T1RHO        0.00000000
T2           500.0530878 MHz
NUC1          1H
P1           12.00 usec
PC           25.7940045 W
F2 - Processing parameters
SI           500.0530878 MHz
SF           500.0530878 MHz
WDW          EM
SSB          0
GB           0.30 Hz
PC           1.00
  
```

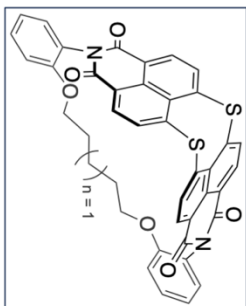

Figure S7. <sup>1</sup>H NMR spectrum of 15a in 1,1,2,2-tetrachloroethane-*d*<sub>2</sub> at 25 °C.

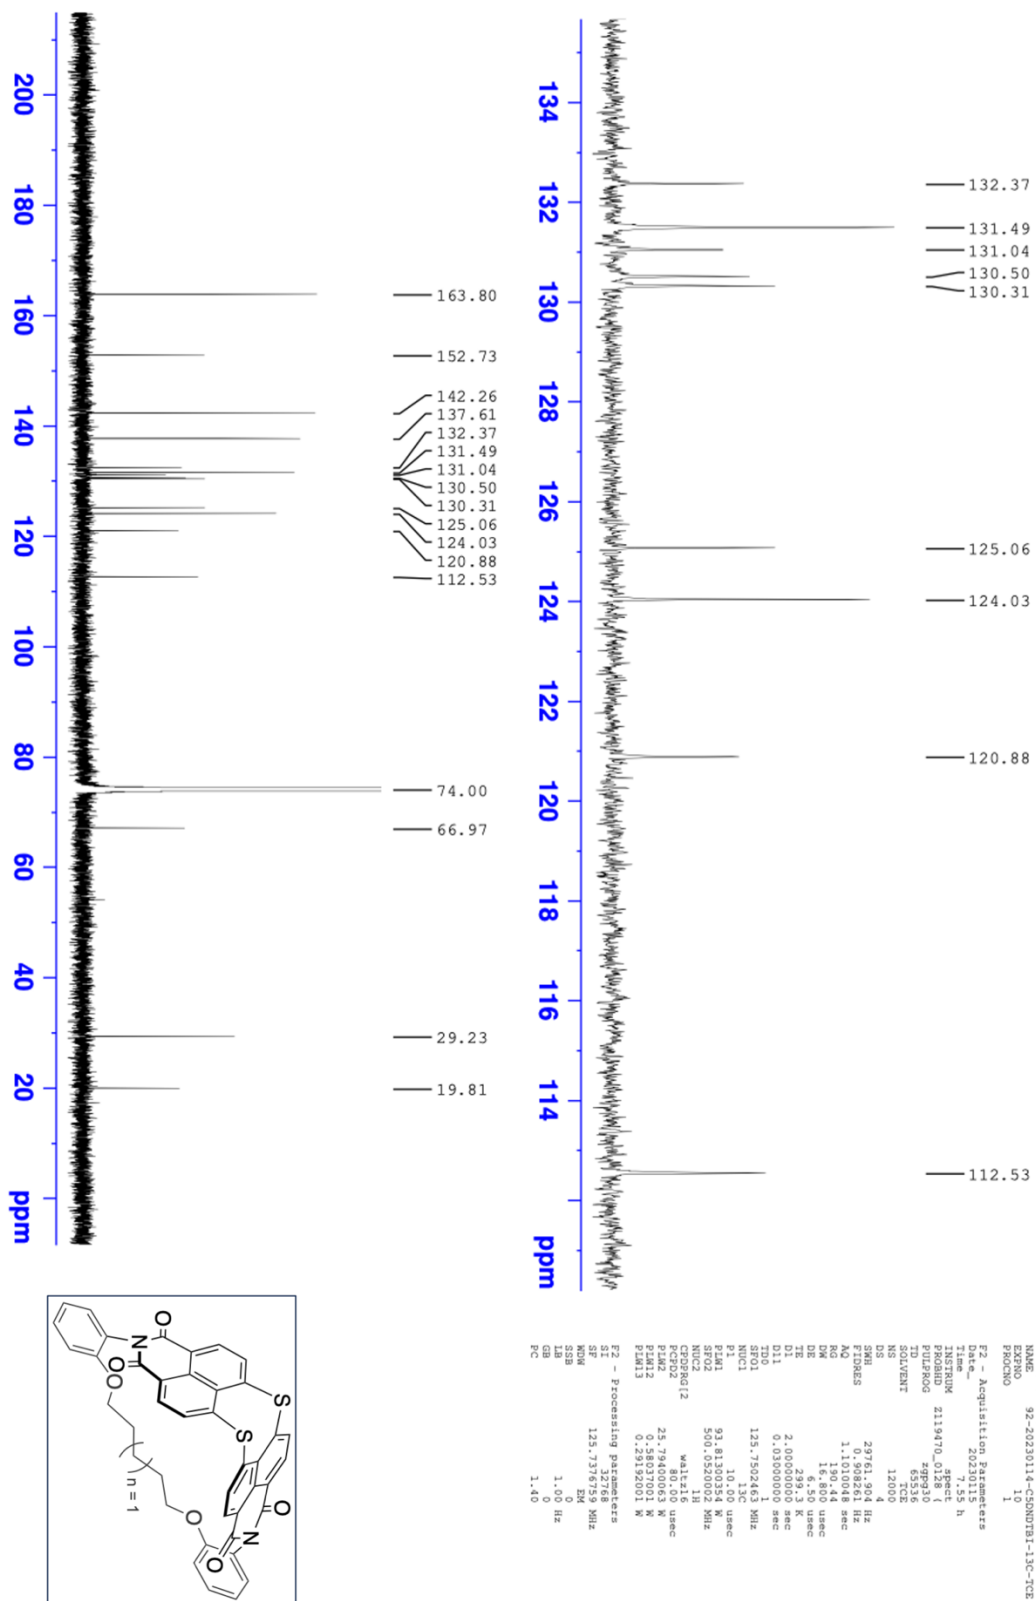

Figure S8. <sup>13</sup>C NMR spectrum of **15a** in 1,1,2,2-tetrachloroethane-*d*<sub>2</sub> at 25 °C.

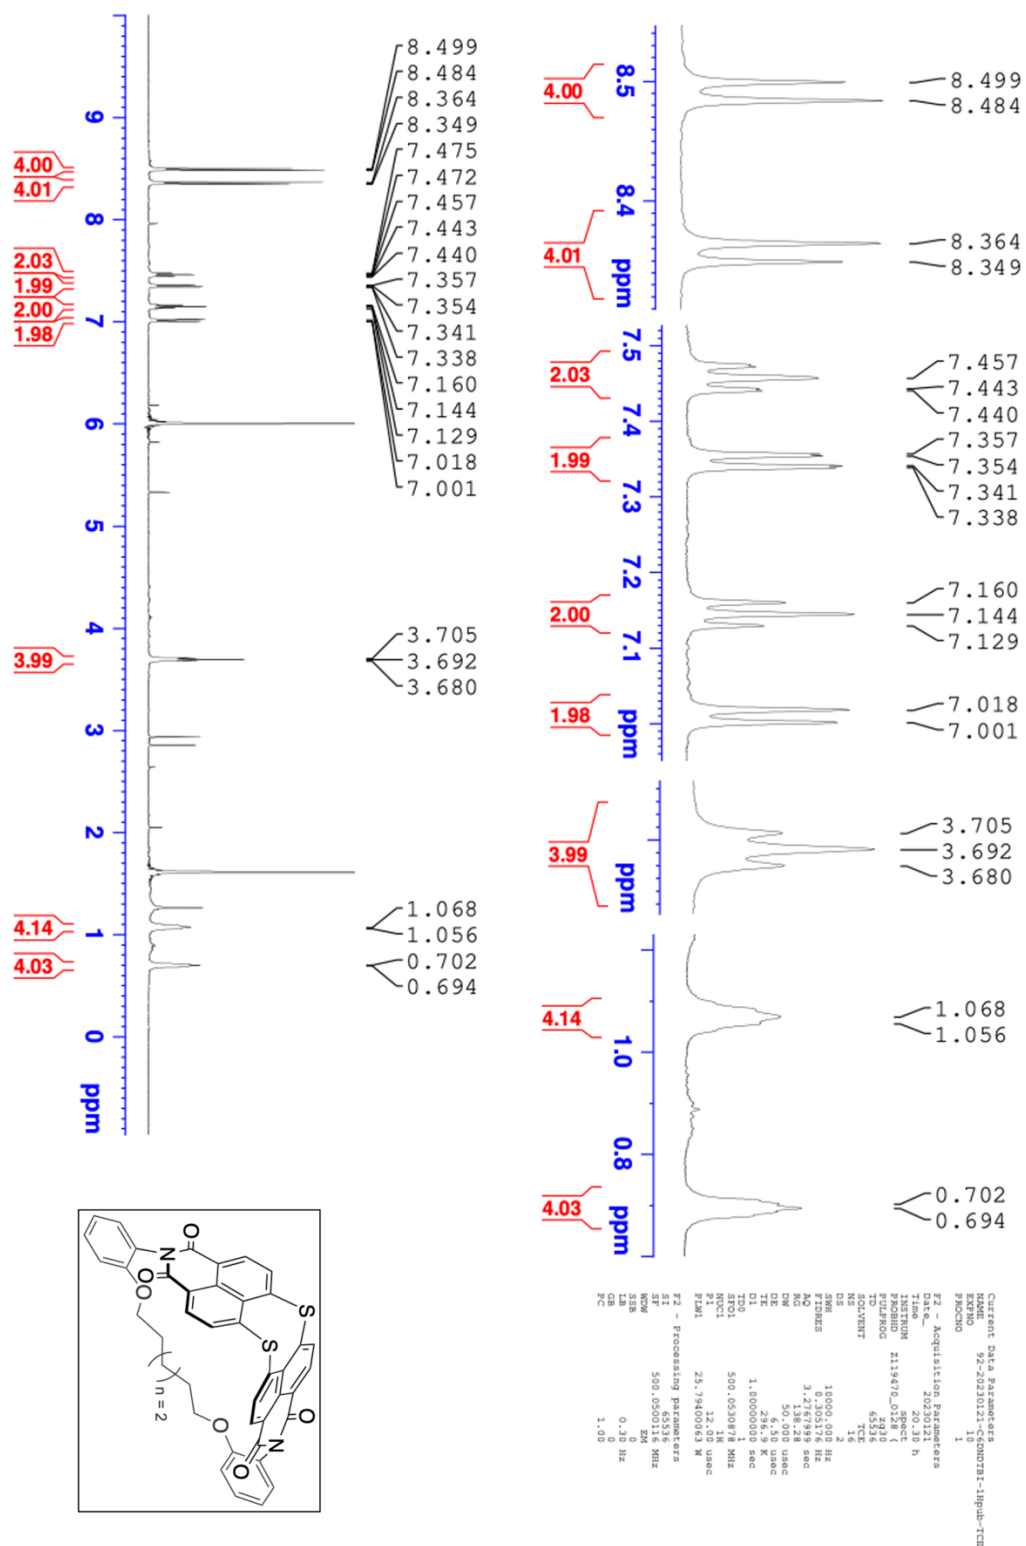

Figure S9. <sup>1</sup>H NMR spectrum of **15b** in 1,1,2,2-tetrachloroethane-*d*<sub>2</sub> at 25 °C.

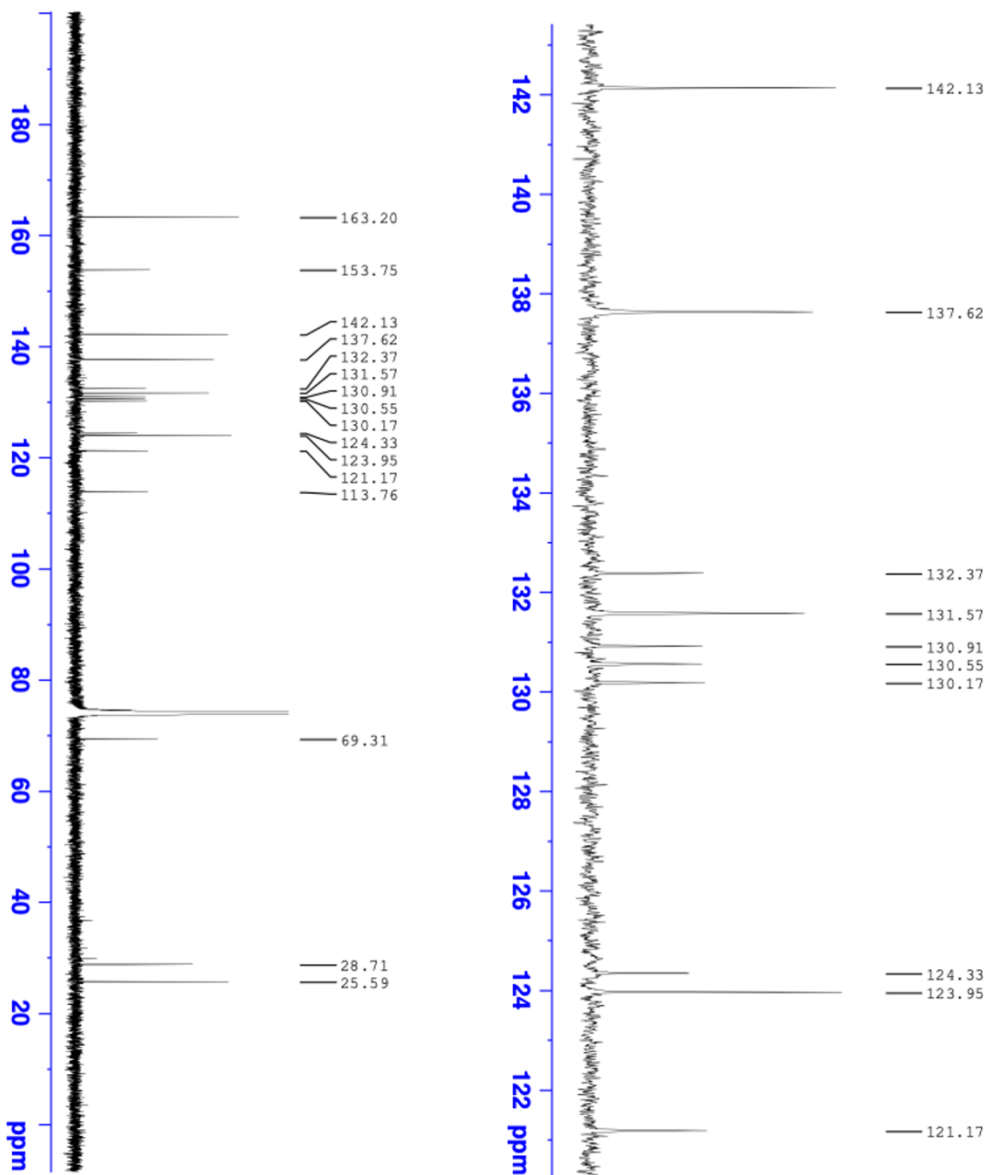

```

Current Data Parameters
NAME          92-221011-GENOTR1-13C
EXPNO         10
PROCNO        1
F2 - Acquisition Parameters
Time          8:52:49
Date_         20230910
INSTRUM      spect
PROBHD       5mm QNP1H
PULPROG      zgpg30
TD           65536
SFO          125.7604483
RG           15177
AQ           1.1010048
RG2          190.44
DE           6.50
TE           297.6
D11          0.0300000
D12          0.0300000
D13          0.0300000
TDO          1
SFO2         125.7502483
P1          10.00
P2          10.00
P3          10.00
P4          10.00
P5          10.00
P6          10.00
P7          10.00
P8          10.00
P9          10.00
P10         10.00
P11         10.00
P12         10.00
P13         10.00
P14         10.00
P15         10.00
P16         10.00
P17         10.00
P18         10.00
P19         10.00
P20         10.00
P21         10.00
P22         10.00
P23         10.00
P24         10.00
P25         10.00
P26         10.00
P27         10.00
P28         10.00
P29         10.00
P30         10.00
P31         10.00
P32         10.00
P33         10.00
P34         10.00
P35         10.00
P36         10.00
P37         10.00
P38         10.00
P39         10.00
P40         10.00
P41         10.00
P42         10.00
P43         10.00
P44         10.00
P45         10.00
P46         10.00
P47         10.00
P48         10.00
P49         10.00
P50         10.00
P51         10.00
P52         10.00
P53         10.00
P54         10.00
P55         10.00
P56         10.00
P57         10.00
P58         10.00
P59         10.00
P60         10.00
P61         10.00
P62         10.00
P63         10.00
P64         10.00
P65         10.00
P66         10.00
P67         10.00
P68         10.00
P69         10.00
P70         10.00
P71         10.00
P72         10.00
P73         10.00
P74         10.00
P75         10.00
P76         10.00
P77         10.00
P78         10.00
P79         10.00
P80         10.00
P81         10.00
P82         10.00
P83         10.00
P84         10.00
P85         10.00
P86         10.00
P87         10.00
P88         10.00
P89         10.00
P90         10.00
P91         10.00
P92         10.00
P93         10.00
P94         10.00
P95         10.00
P96         10.00
P97         10.00
P98         10.00
P99         10.00
P100        10.00
F2 - Processing Parameters
SI          32768
SF          125.7604483
AQ          1.1010048
RG          190.44
DE          6.50
TE          297.6
D11         0.0300000
D12         0.0300000
D13         0.0300000
TDO         1
SFO2        125.7502483
P1          10.00
P2          10.00
P3          10.00
P4          10.00
P5          10.00
P6          10.00
P7          10.00
P8          10.00
P9          10.00
P10         10.00
P11         10.00
P12         10.00
P13         10.00
P14         10.00
P15         10.00
P16         10.00
P17         10.00
P18         10.00
P19         10.00
P20         10.00
P21         10.00
P22         10.00
P23         10.00
P24         10.00
P25         10.00
P26         10.00
P27         10.00
P28         10.00
P29         10.00
P30         10.00
P31         10.00
P32         10.00
P33         10.00
P34         10.00
P35         10.00
P36         10.00
P37         10.00
P38         10.00
P39         10.00
P40         10.00
P41         10.00
P42         10.00
P43         10.00
P44         10.00
P45         10.00
P46         10.00
P47         10.00
P48         10.00
P49         10.00
P50         10.00
P51         10.00
P52         10.00
P53         10.00
P54         10.00
P55         10.00
P56         10.00
P57         10.00
P58         10.00
P59         10.00
P60         10.00
P61         10.00
P62         10.00
P63         10.00
P64         10.00
P65         10.00
P66         10.00
P67         10.00
P68         10.00
P69         10.00
P70         10.00
P71         10.00
P72         10.00
P73         10.00
P74         10.00
P75         10.00
P76         10.00
P77         10.00
P78         10.00
P79         10.00
P80         10.00
P81         10.00
P82         10.00
P83         10.00
P84         10.00
P85         10.00
P86         10.00
P87         10.00
P88         10.00
P89         10.00
P90         10.00
P91         10.00
P92         10.00
P93         10.00
P94         10.00
P95         10.00
P96         10.00
P97         10.00
P98         10.00
P99         10.00
P100        10.00
  
```

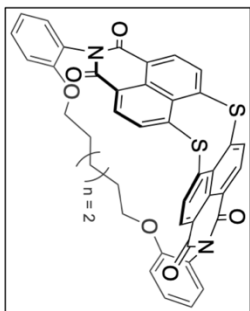

Figure S10. <sup>13</sup>C NMR spectrum of **15b** in 1,1,2,2-tetrachloroethane-*d*<sub>2</sub> at 25 °C.

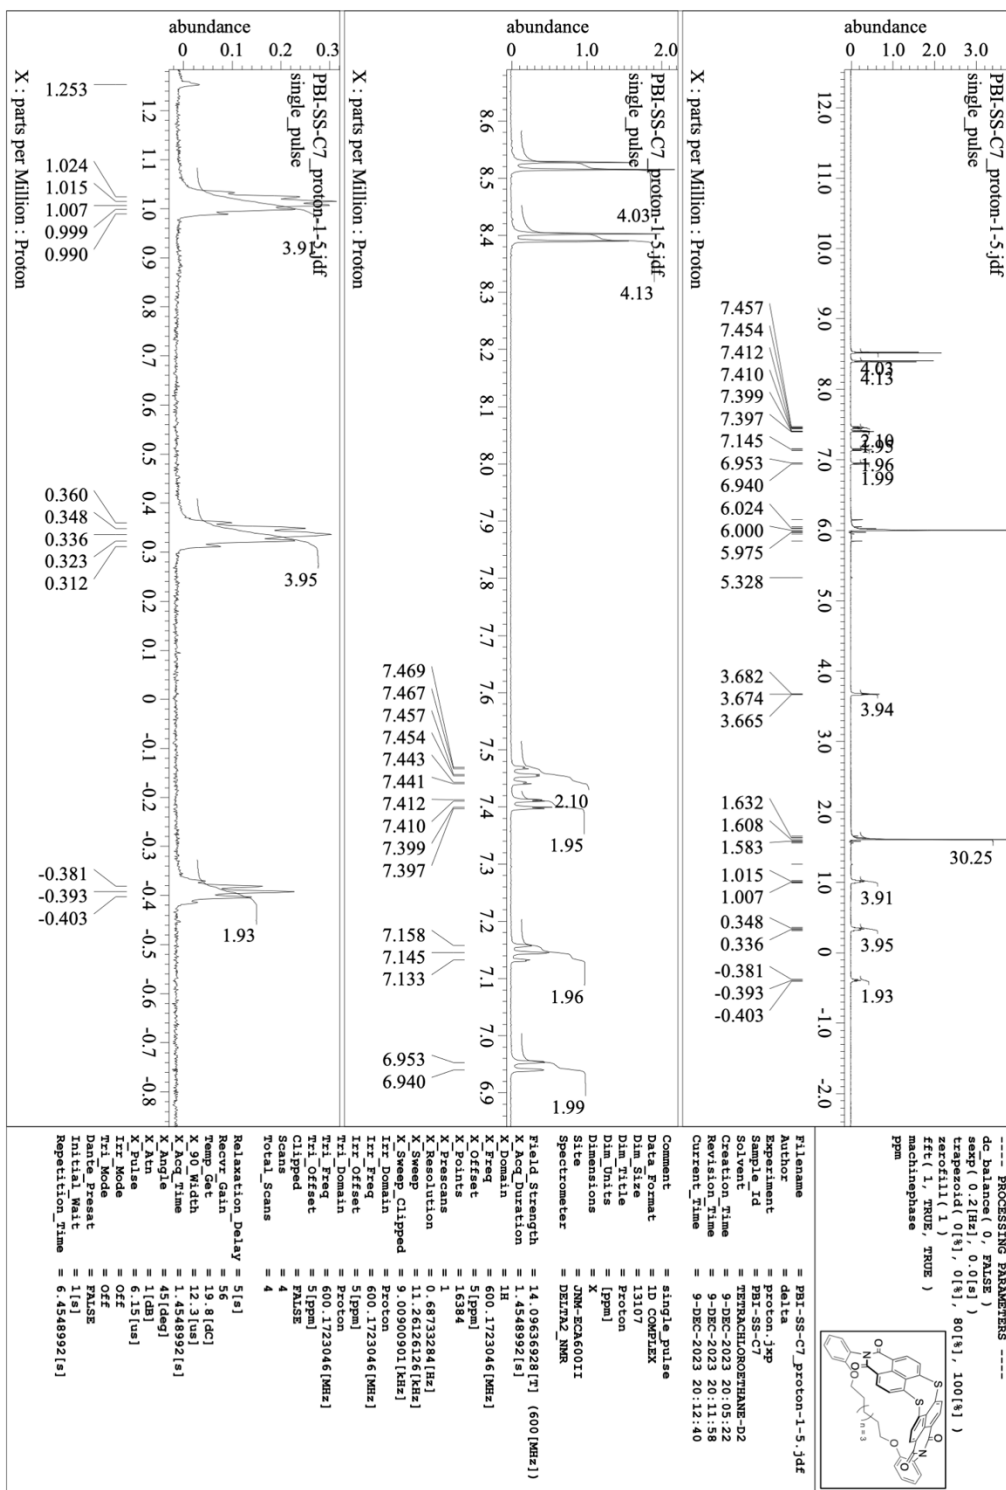

Figure S11. <sup>1</sup>H NMR spectrum of **15c** in 1,1,2,2-tetrachloroethane-*d*<sub>2</sub> at 25 °C.

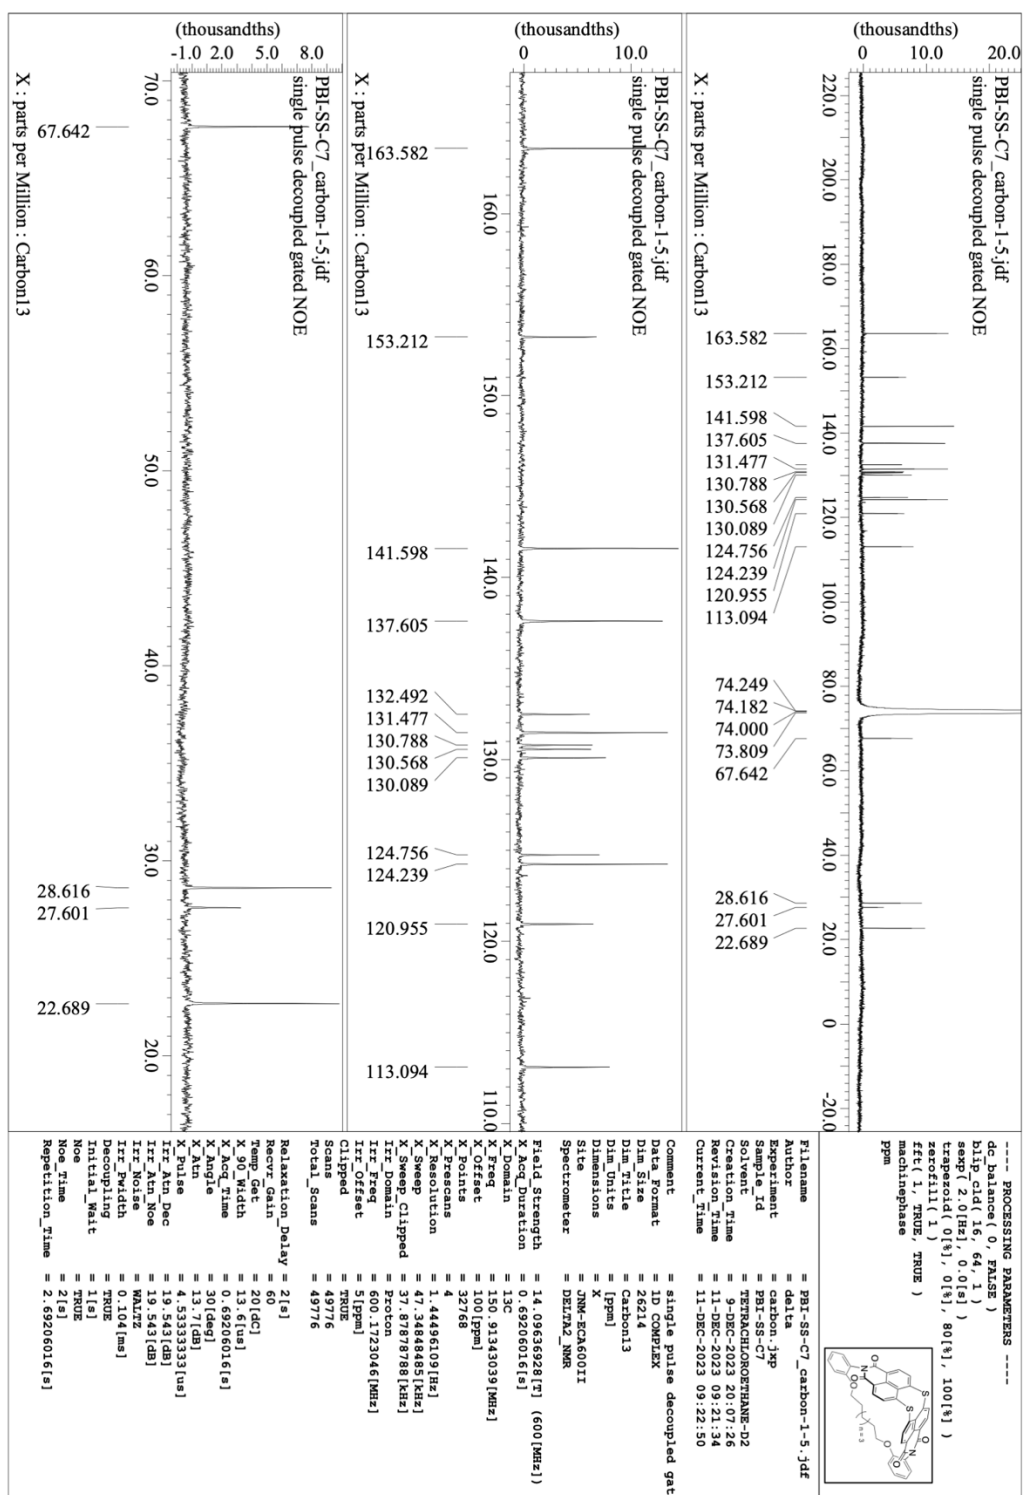

Figure S12.  $^{13}\text{C}$  NMR spectrum of **15c** in 1,1,2,2-tetrachloroethane- $d_2$  at 25 °C.



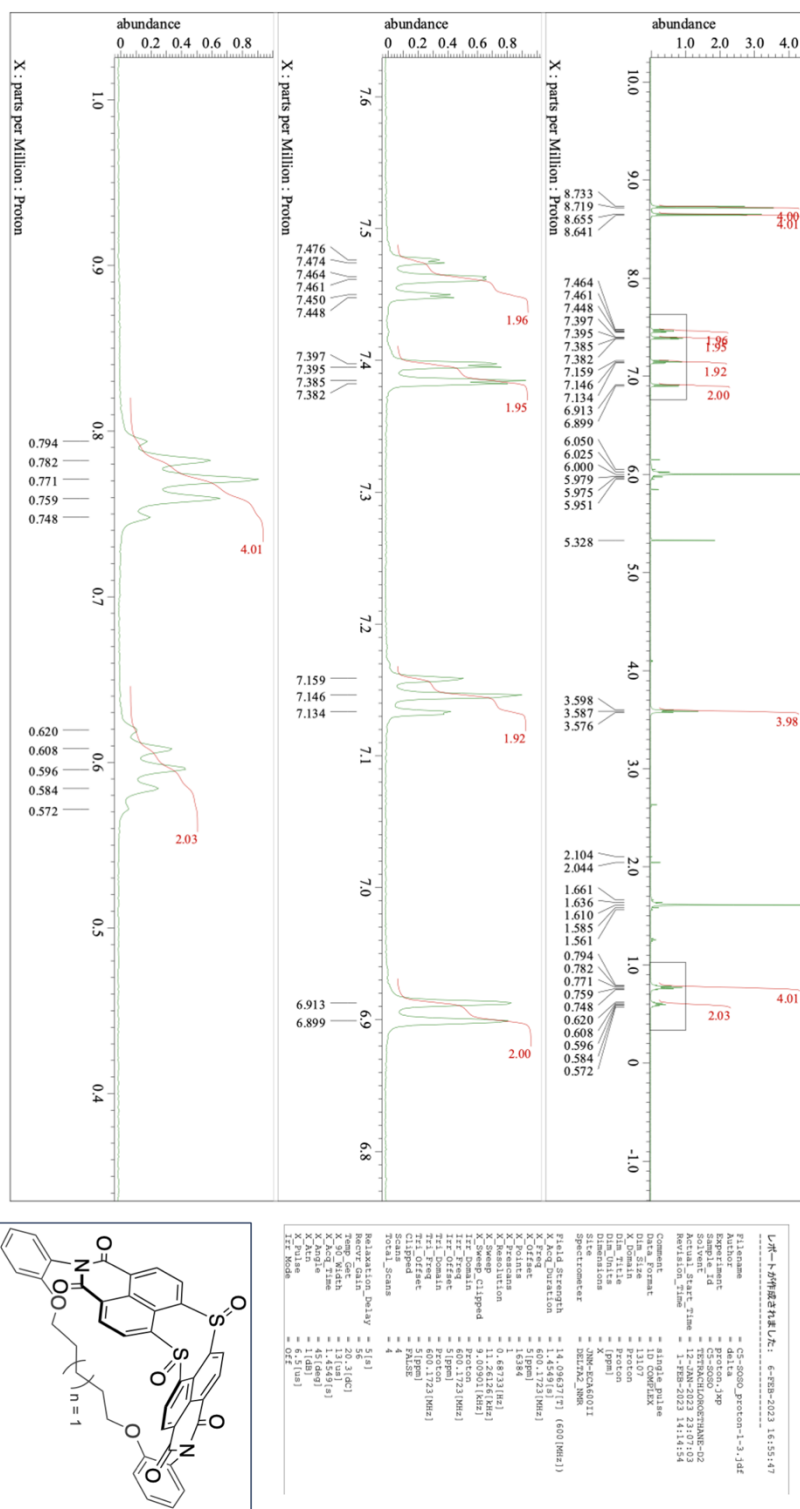

Figure S13. <sup>1</sup>H NMR spectrum of **4a** in 1,1,2,2-tetrachloroethane-*d*<sub>2</sub> at 25 °C.



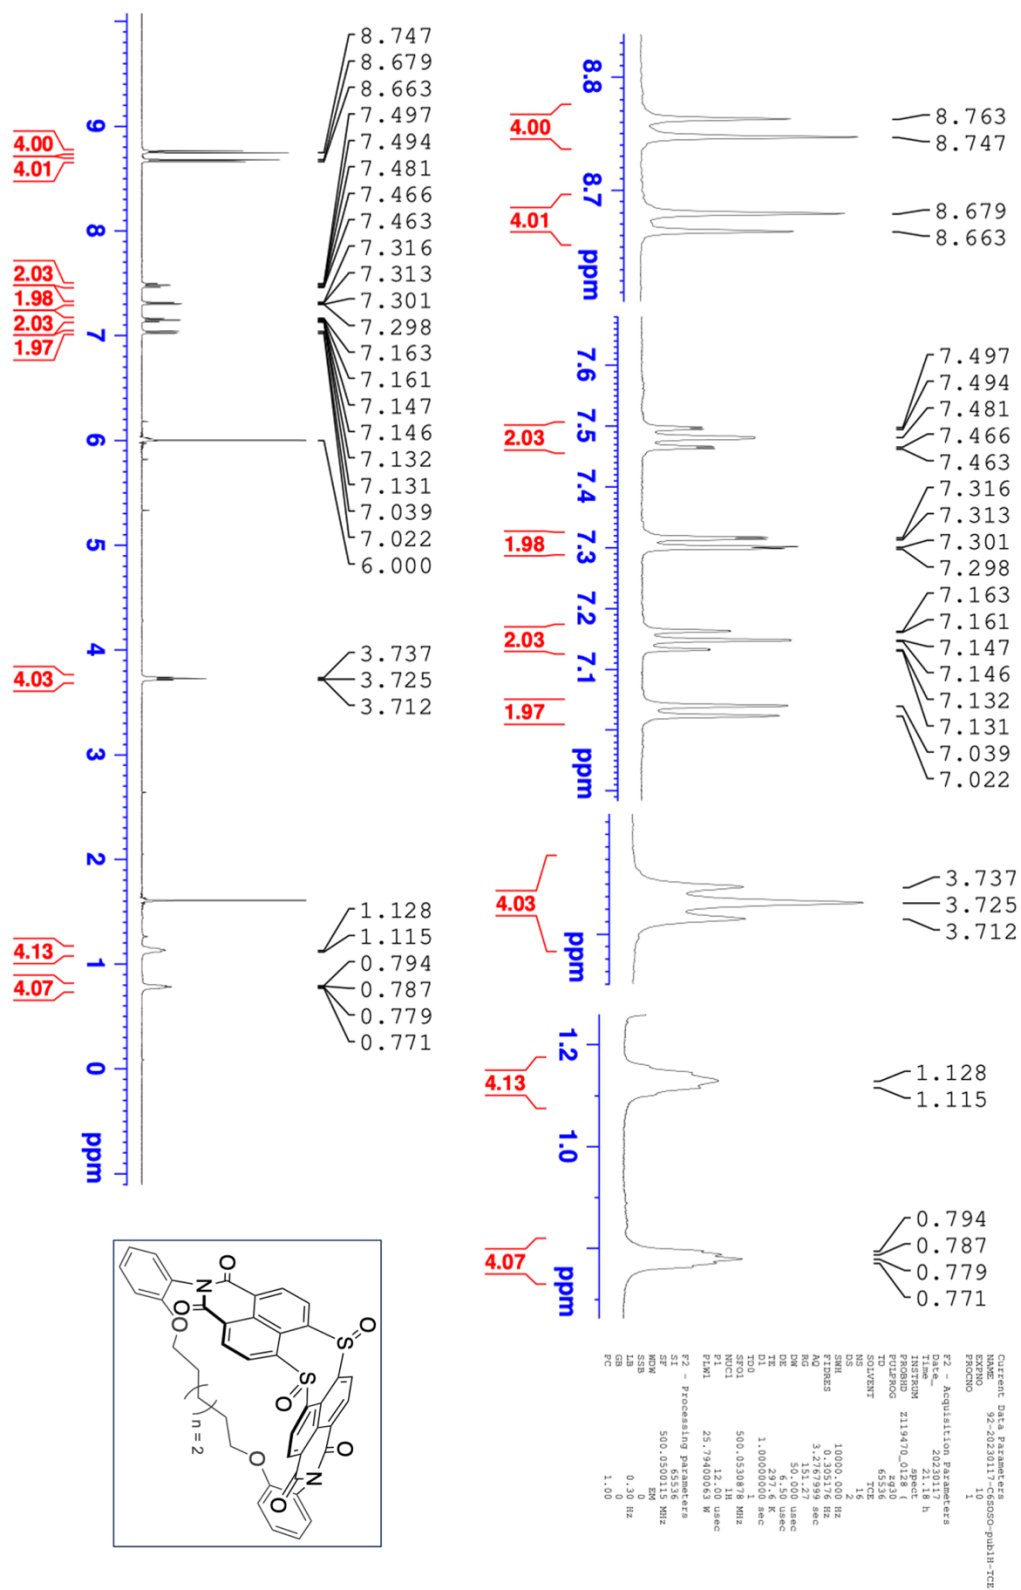

Figure S15. <sup>1</sup>H NMR spectrum of **4b** in 1,1,2,2-tetrachloroethane-*d*<sub>2</sub> at 25 °C.

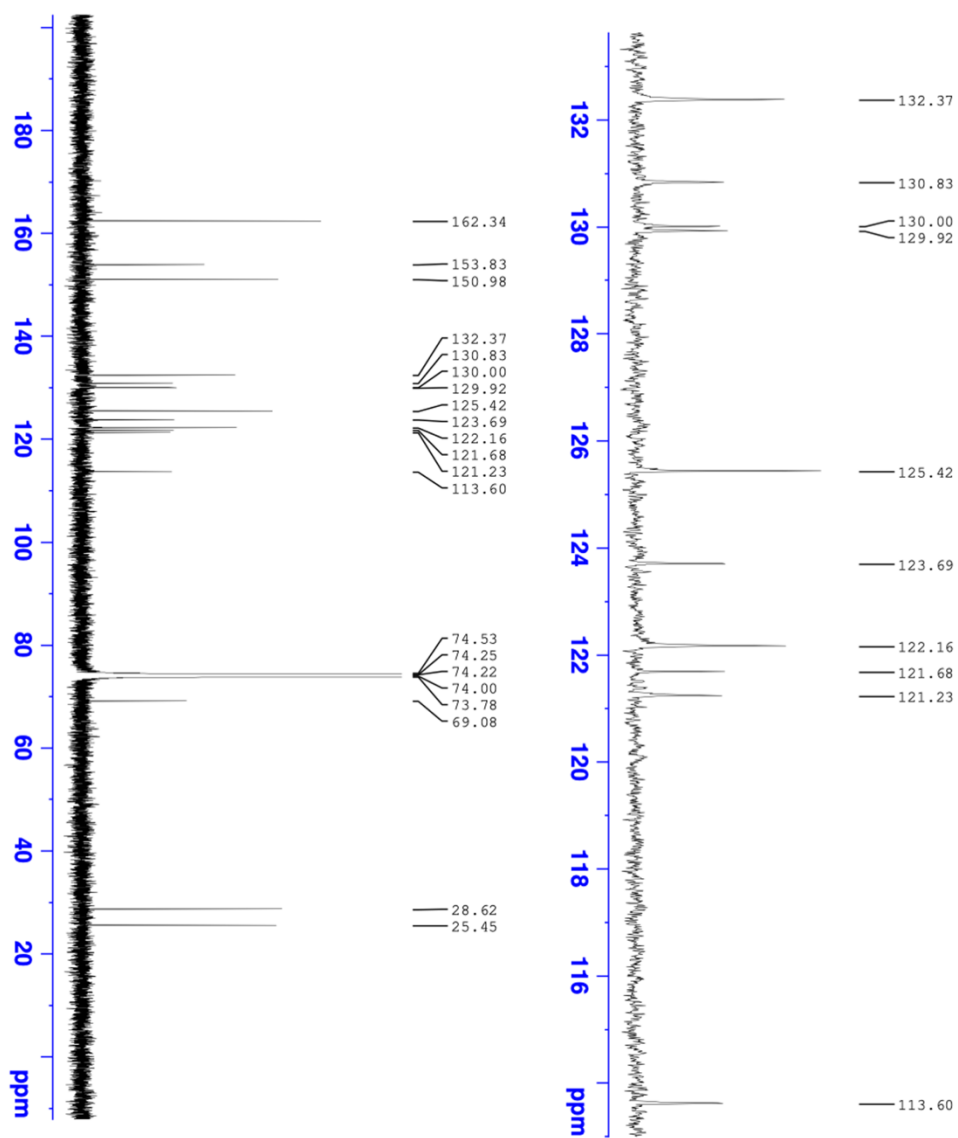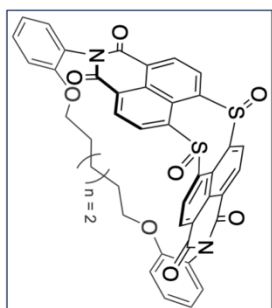

```

Current Data Parameters
NAME 92-20230117-65600-13C
EXPNO 10
PROCNO 1
F2 - Acquisition Parameters
Date_ 20230118
Time 11:11
INSTRUM spect
PROBHD 2119470_0128 (
PULPROG zgpg30
TD 65536
SOLVENT TCE
SOLVENT 110.00
NS 1024
DS 4
SWH 23941.904 Hz
FIDRES 0.30824 Hz
AQ 0.0000000 sec
RG 1.19044 sec
DM 16.800 usec
DE 298.3 K
TE 2.0000000 sec
D1 0.0300000 sec
d11
NUC1 13C
NUC2 13C
PL1 93.810034 W
PL2 500.052002 MHz
SFO2
NAME 92-20230117-65600-13C
PROCNO 1
F2 - Processing parameters
SI 32768
SF 125.7376159 MHz
SD 0
SSB 0
LB 1.00 Hz
GB 0
CB 1.40
  
```

Figure S16.  $^{13}\text{C}$  NMR spectrum of **4b** in 1,1,2,2-tetrachloroethane- $d_2$  at 25 °C.

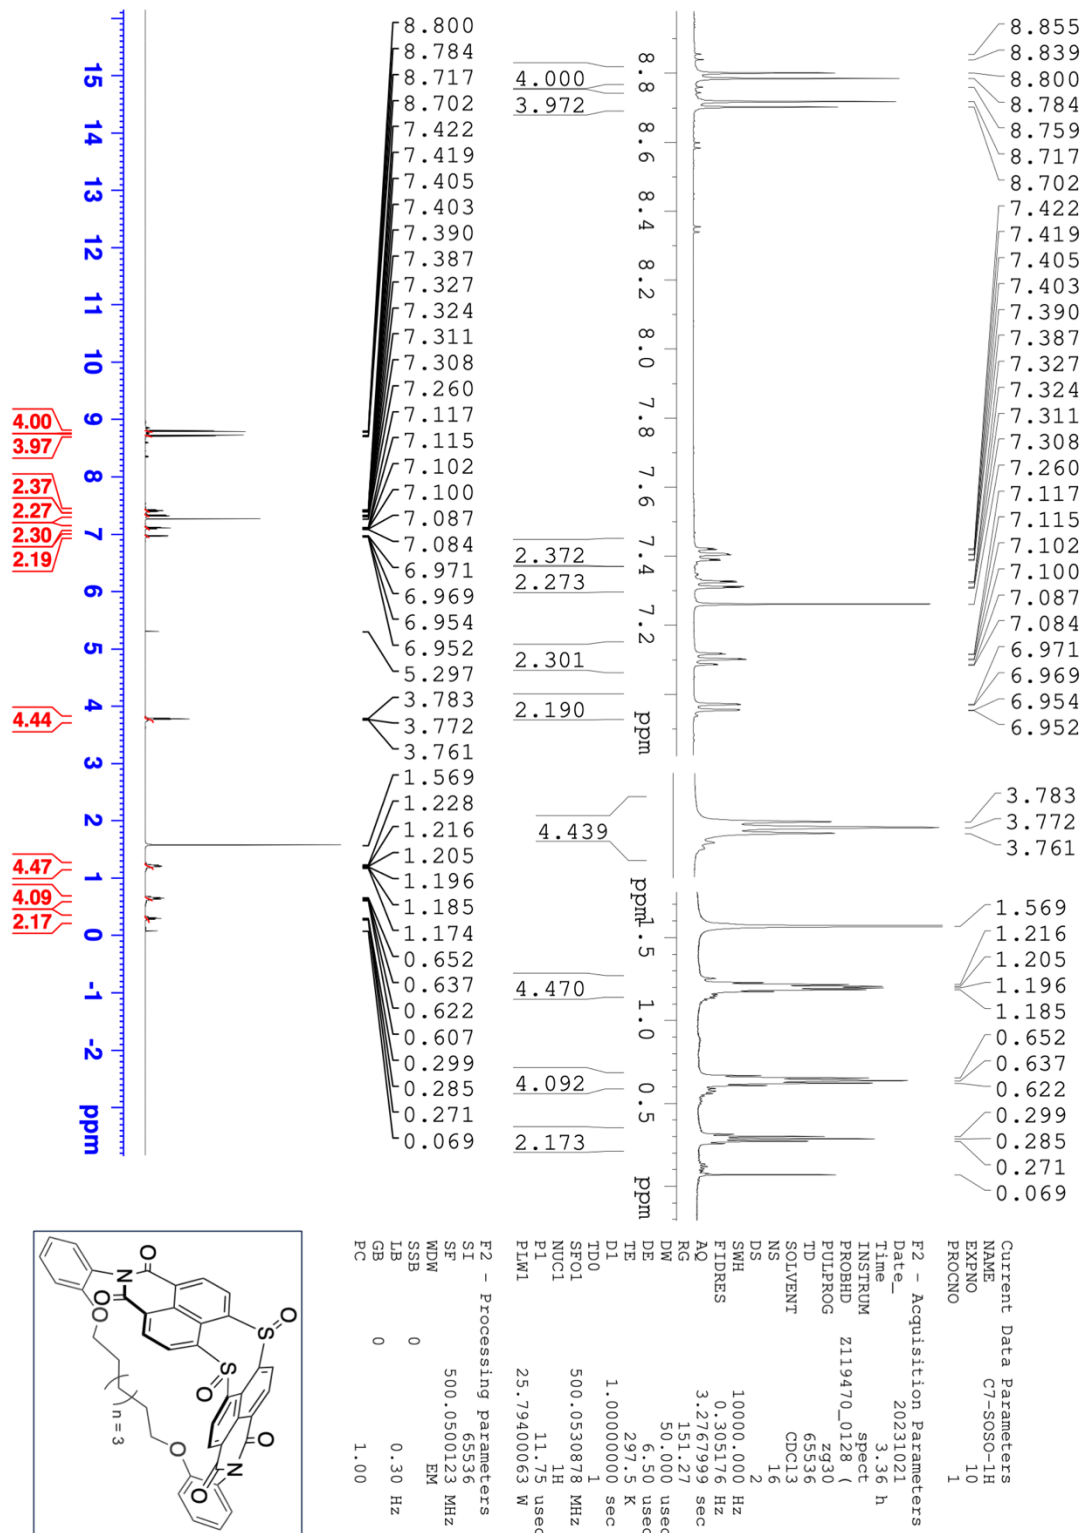

Figure S17. <sup>1</sup>H NMR spectrum of 4c in CDCl<sub>3</sub> at 25 °C.

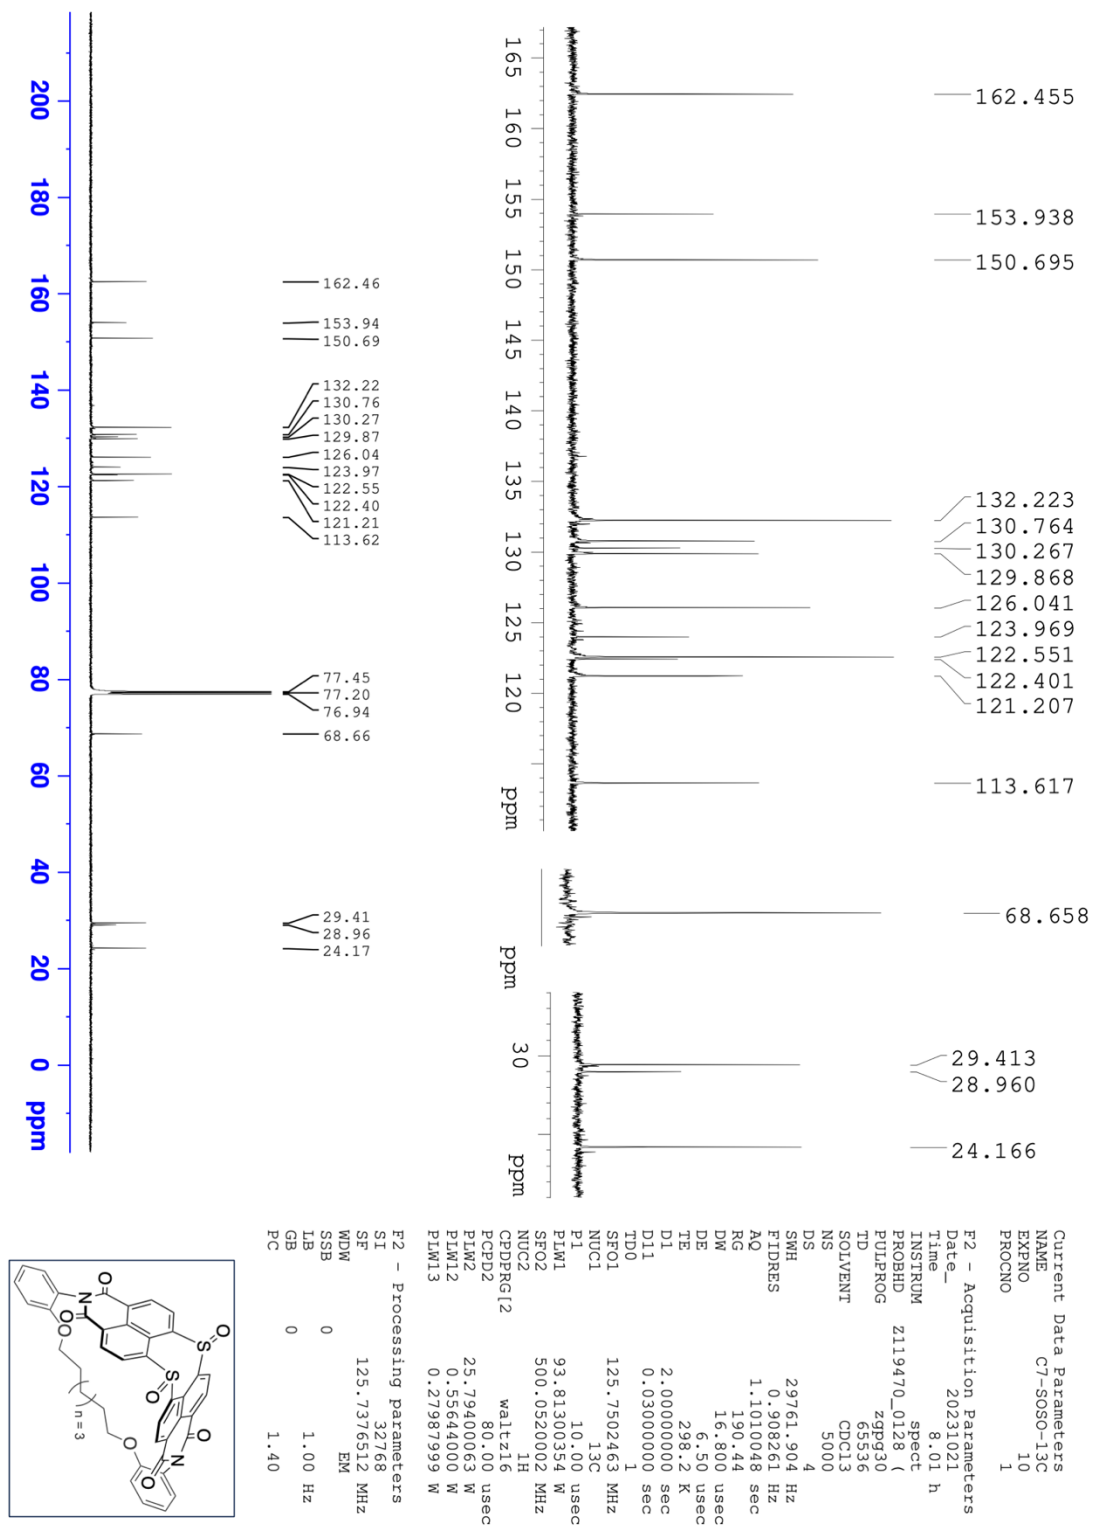

Figure S18. <sup>13</sup>C NMR spectrum of **4c** in CDCl<sub>3</sub> at 25 °C.

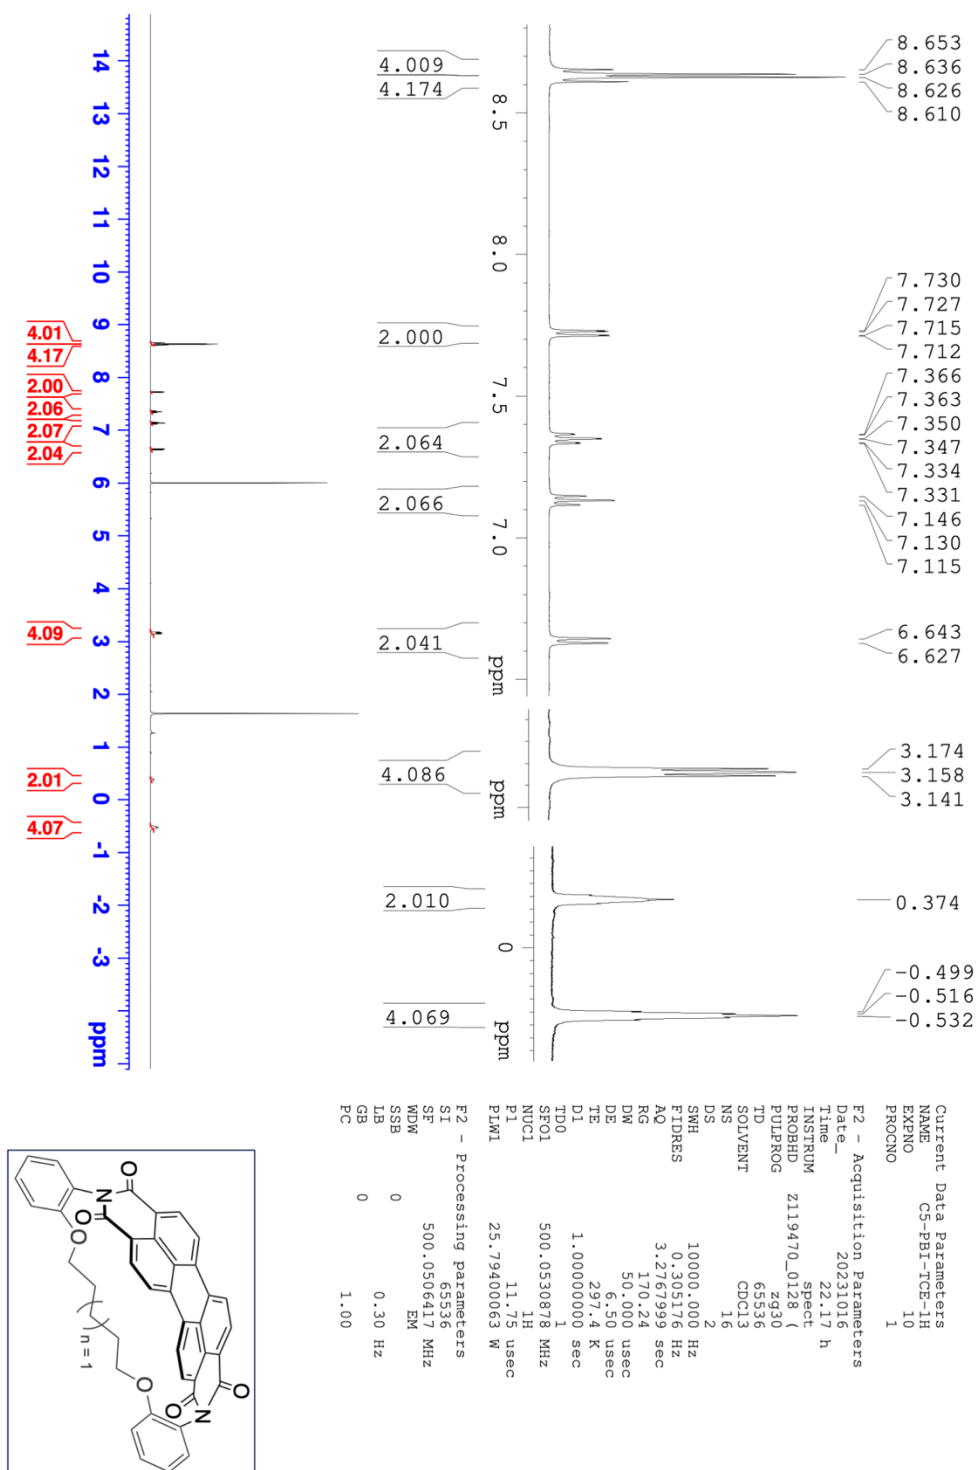

Figure S19. <sup>1</sup>H NMR spectrum of **5a** in 1,1,2,2-tetrachloroethane-*d*<sub>2</sub> at 25 °C.

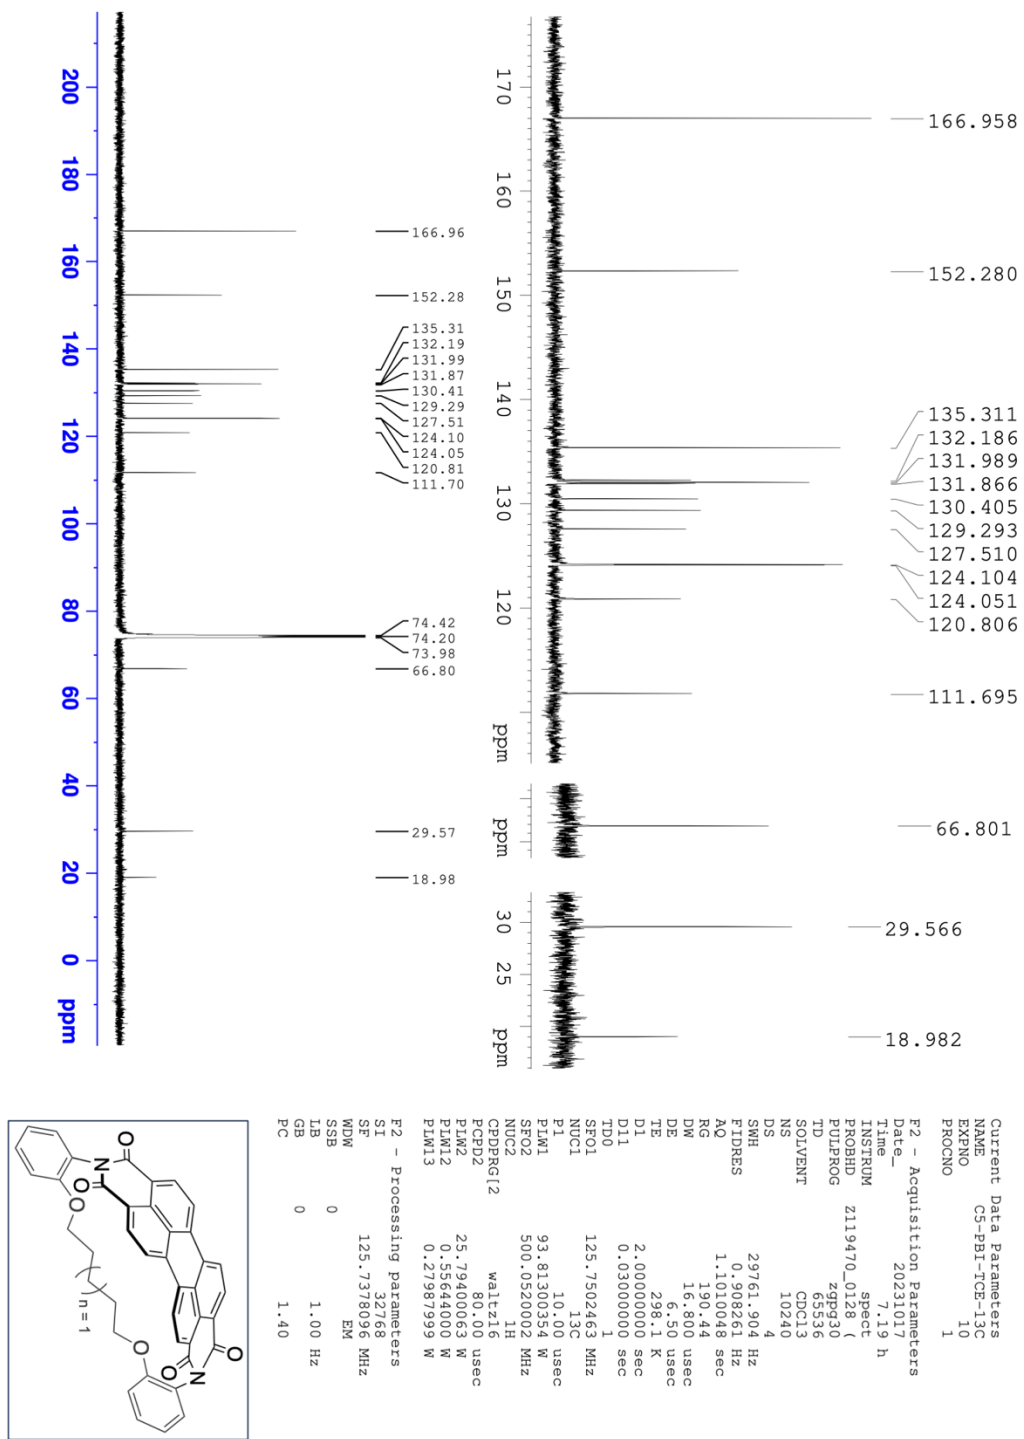

Figure S20. <sup>13</sup>C NMR spectrum of 5a in 1,1,2,2-tetrachloroethane-*d*<sub>2</sub> at 25 °C.



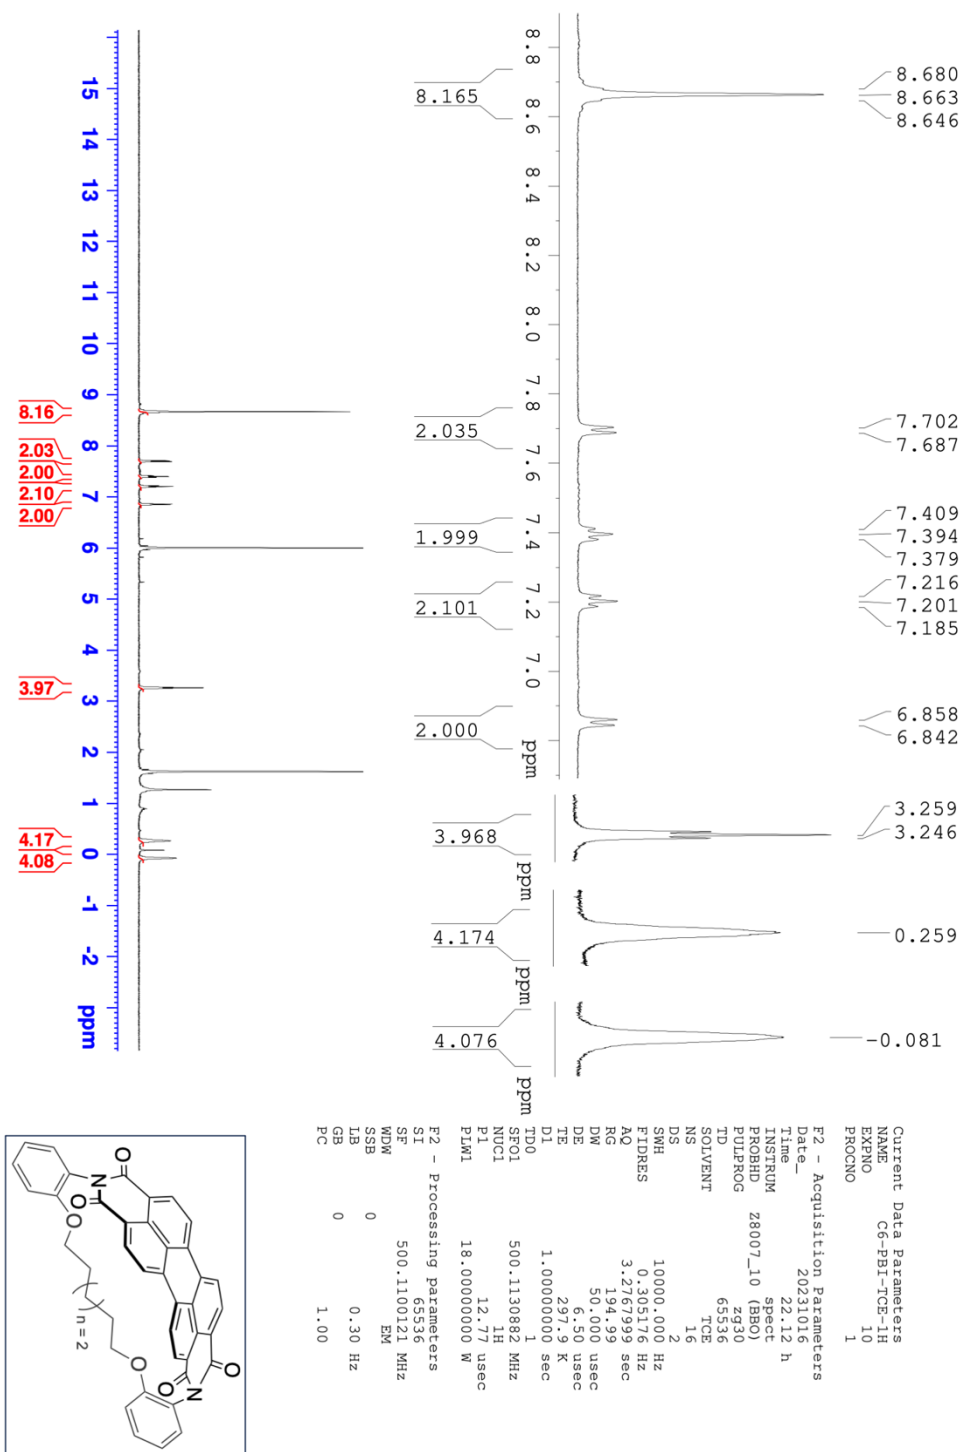

Figure S21. <sup>1</sup>H NMR spectrum of **5b** in 1,1,2,2-tetrachloroethane-*d*<sub>2</sub> at 25 °C.

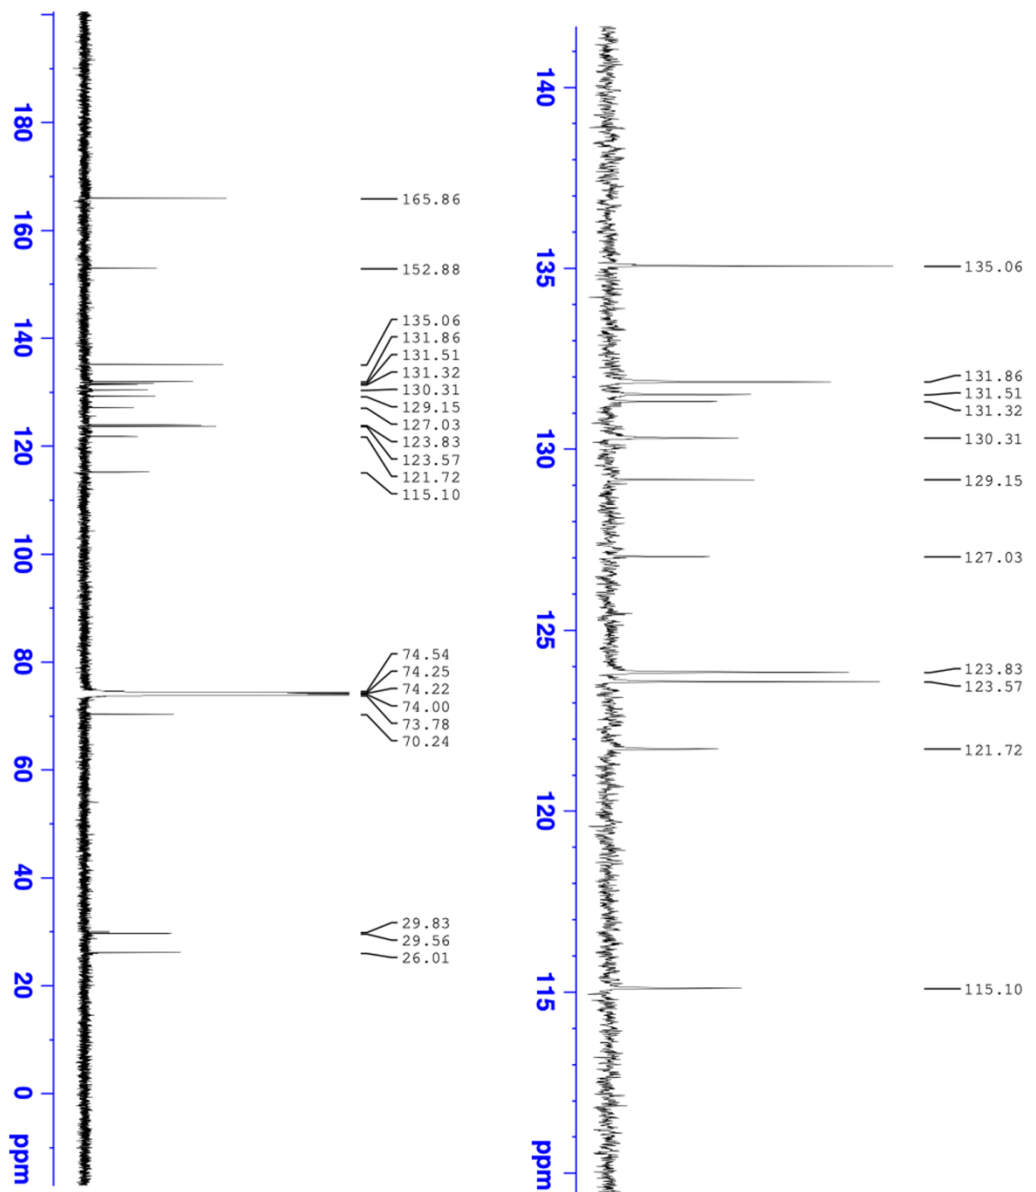

```

Current Data Parameters
Date_ 20230126
Time 9:07 h
PROBHD 5mm 13C QNP
PULPROG zgpg30
SOLVENT CDCl3
NS 13083
DS 4
AQ 1.1010048 sec
FIDRES 0.968261 Hz
AQ 1.1010048 sec
DE 12.800 unec
DI 2.0000000 sec
D11 0.0300000 sec
TD0 125.750244 MHz
NUC1 13C
F1 120.000 unec
F2 93.813213 MHz
SFO2 500.0520002 MHz
NMR2 1H
NAME 11
PCPD2 25.7940063 W
PAM2 0.54037001 W
SMA13 0.25928293 H
F2 - Processing parameters
SF 125.7376159 MHz
MCM EX
DSB 1.00 Hz
GB 0
PC 1.40
  
```

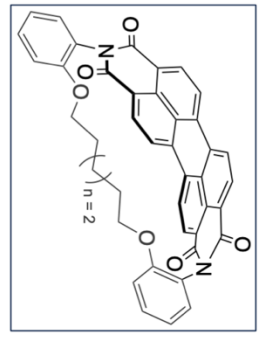

Figure S22. <sup>13</sup>C NMR spectrum of 5b in 1,1,2,2-tetrachloroethane-*d*<sub>2</sub> at 25 °C.



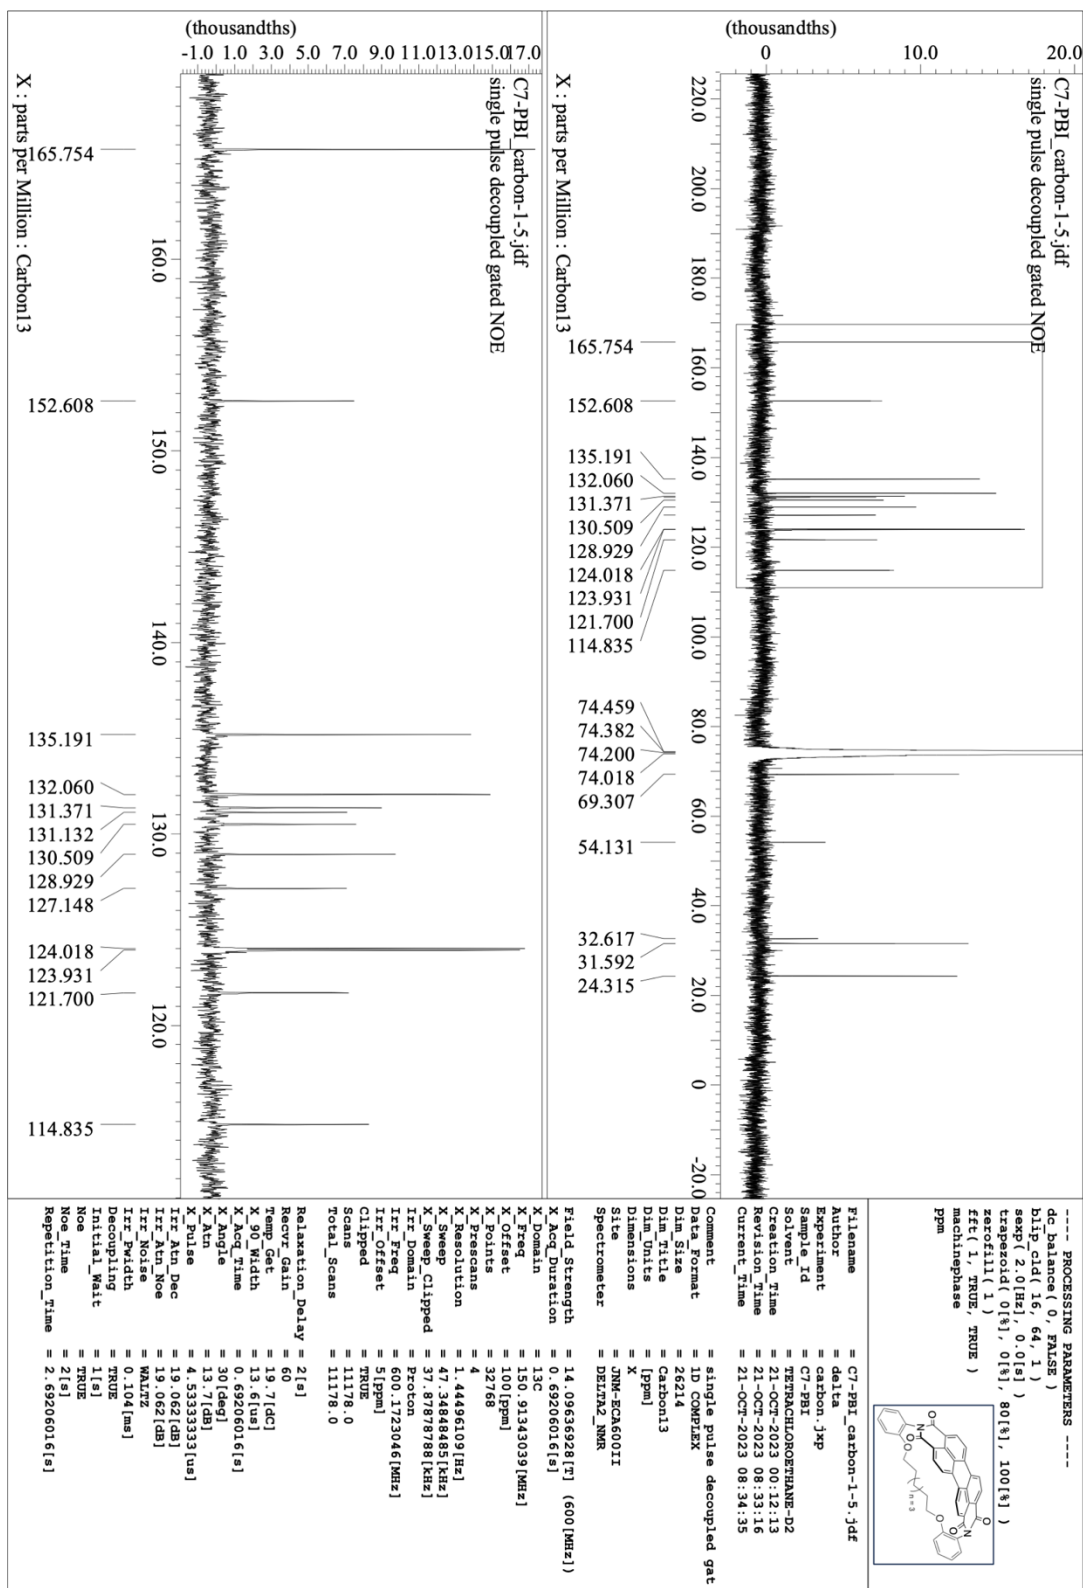

Figure S24.  $^{13}\text{C}$  NMR spectrum of **5c** in 1,1,2,2-tetrachloroethane- $d_2$  at 25 °C.

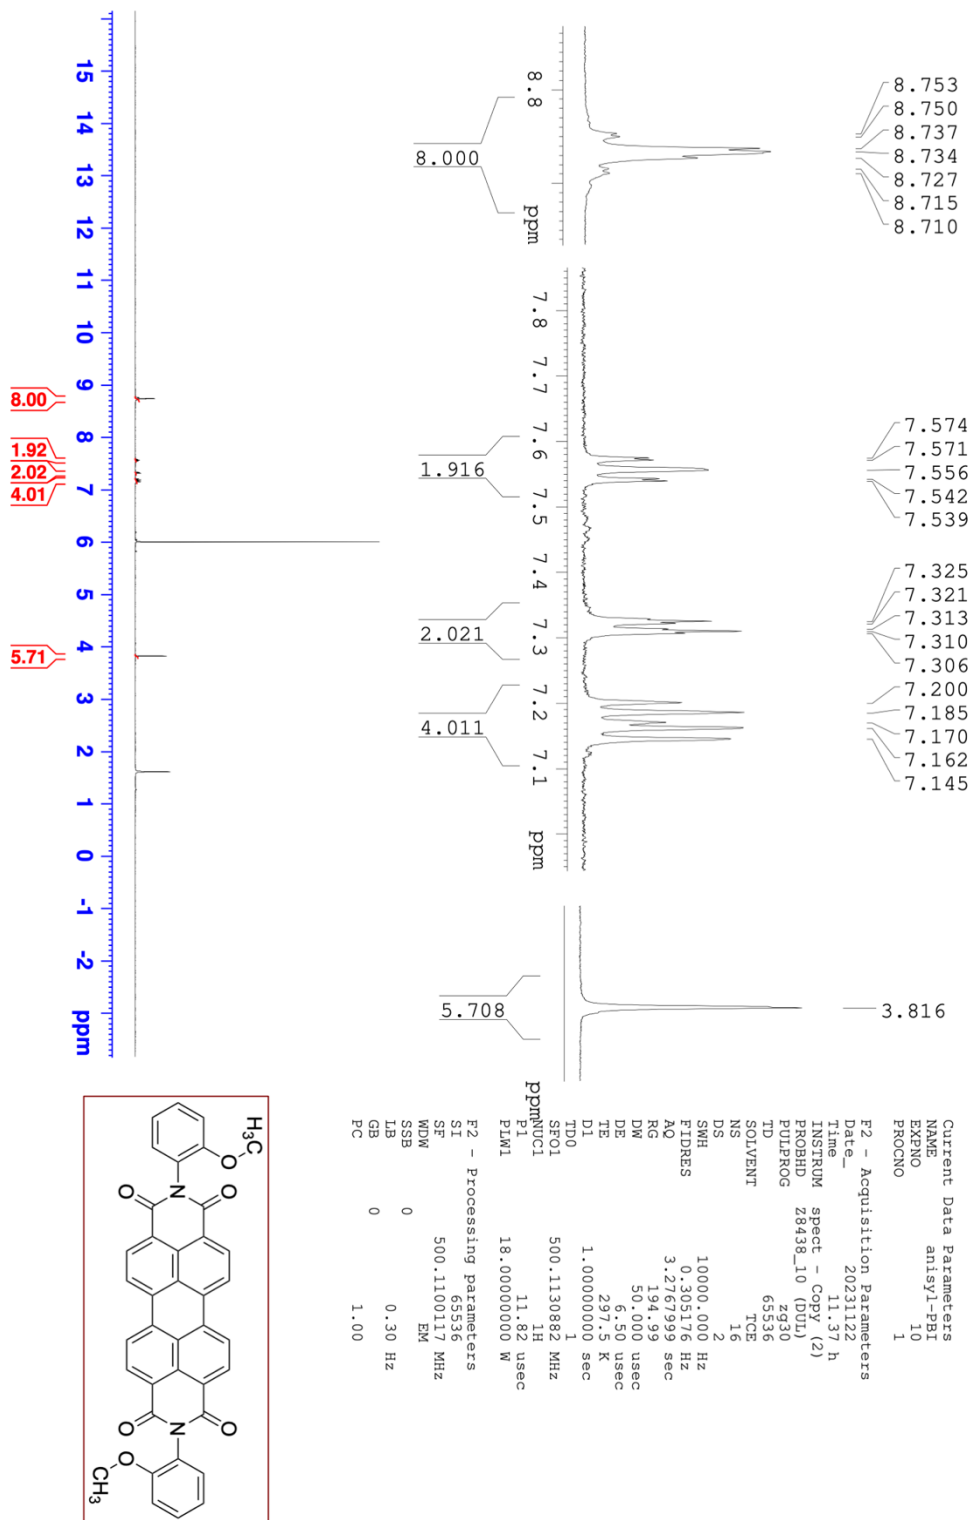

Figure S25. <sup>1</sup>H NMR spectrum of **3''** in 1,1,2,2-tetrachloroethane-*d*<sub>2</sub> at 25 °C.

## 4. Mass spectra

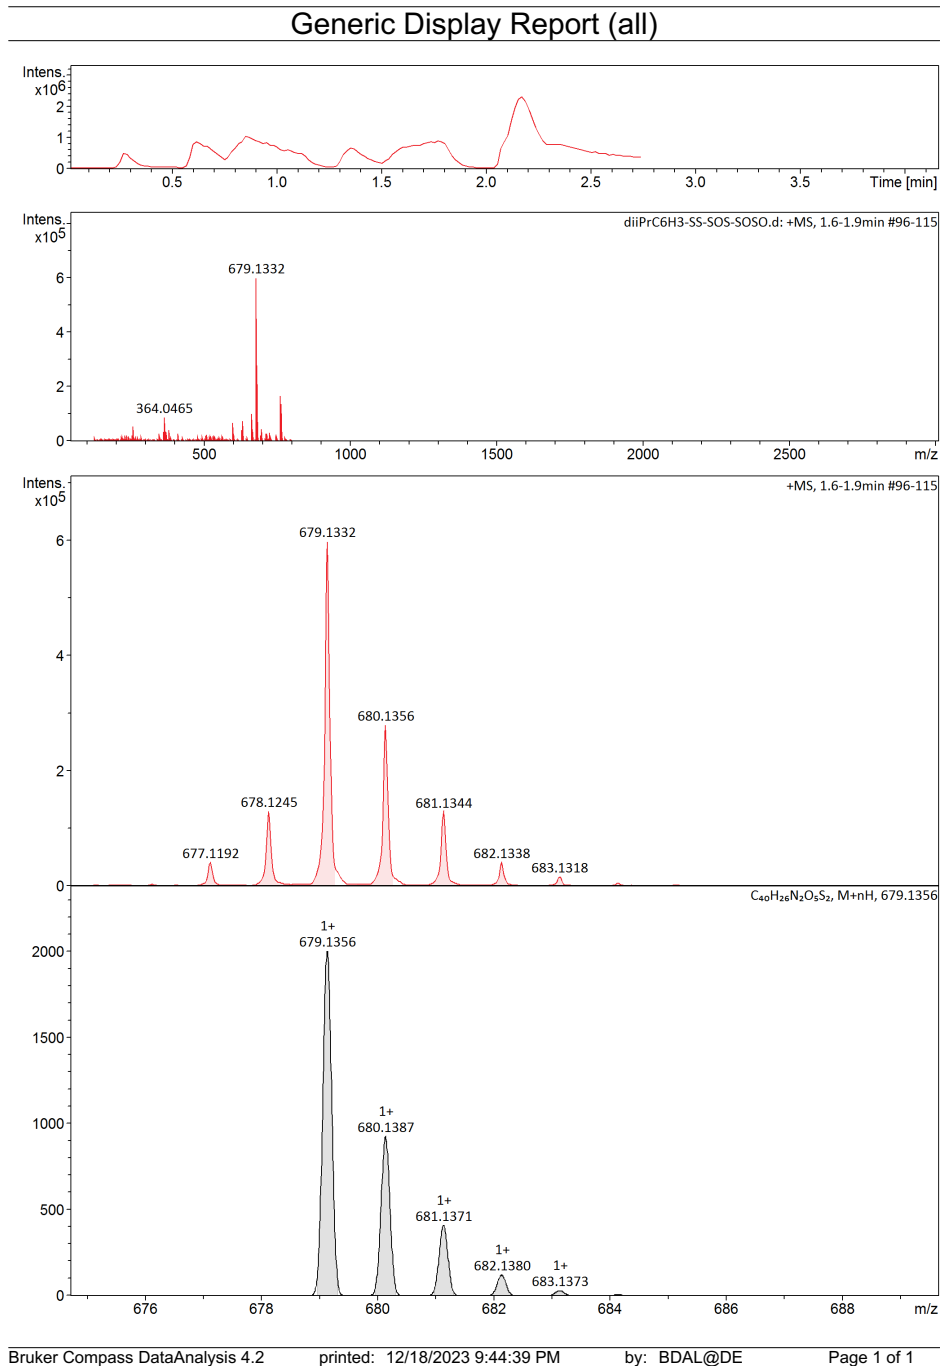

**Figure S26.** APCI-TOF mass spectrum of 10.

## Generic Display Report (all)

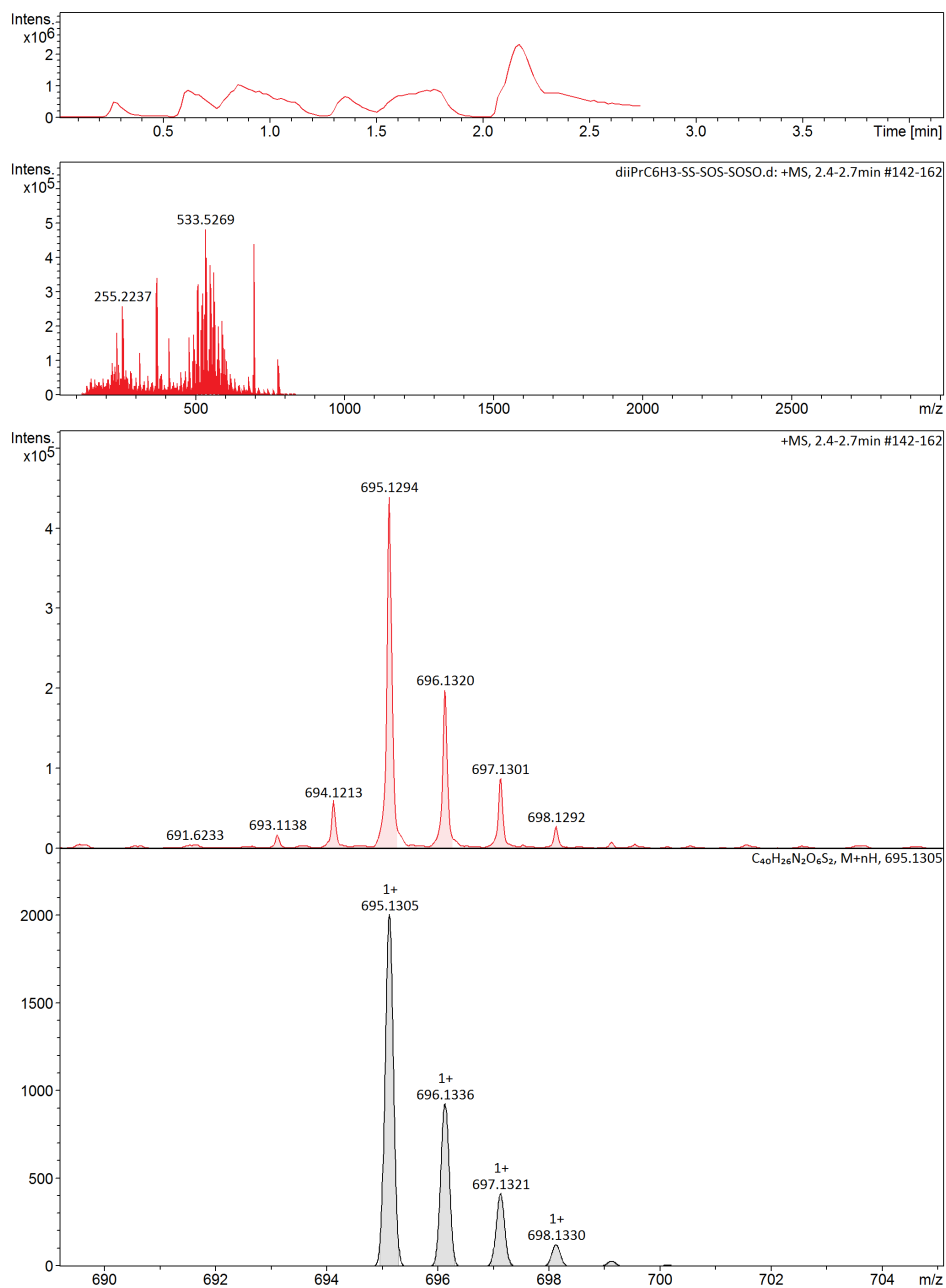

**Figure S27.** APCI-TOF mass spectrum of **11**.

## Generic Display Report (all)

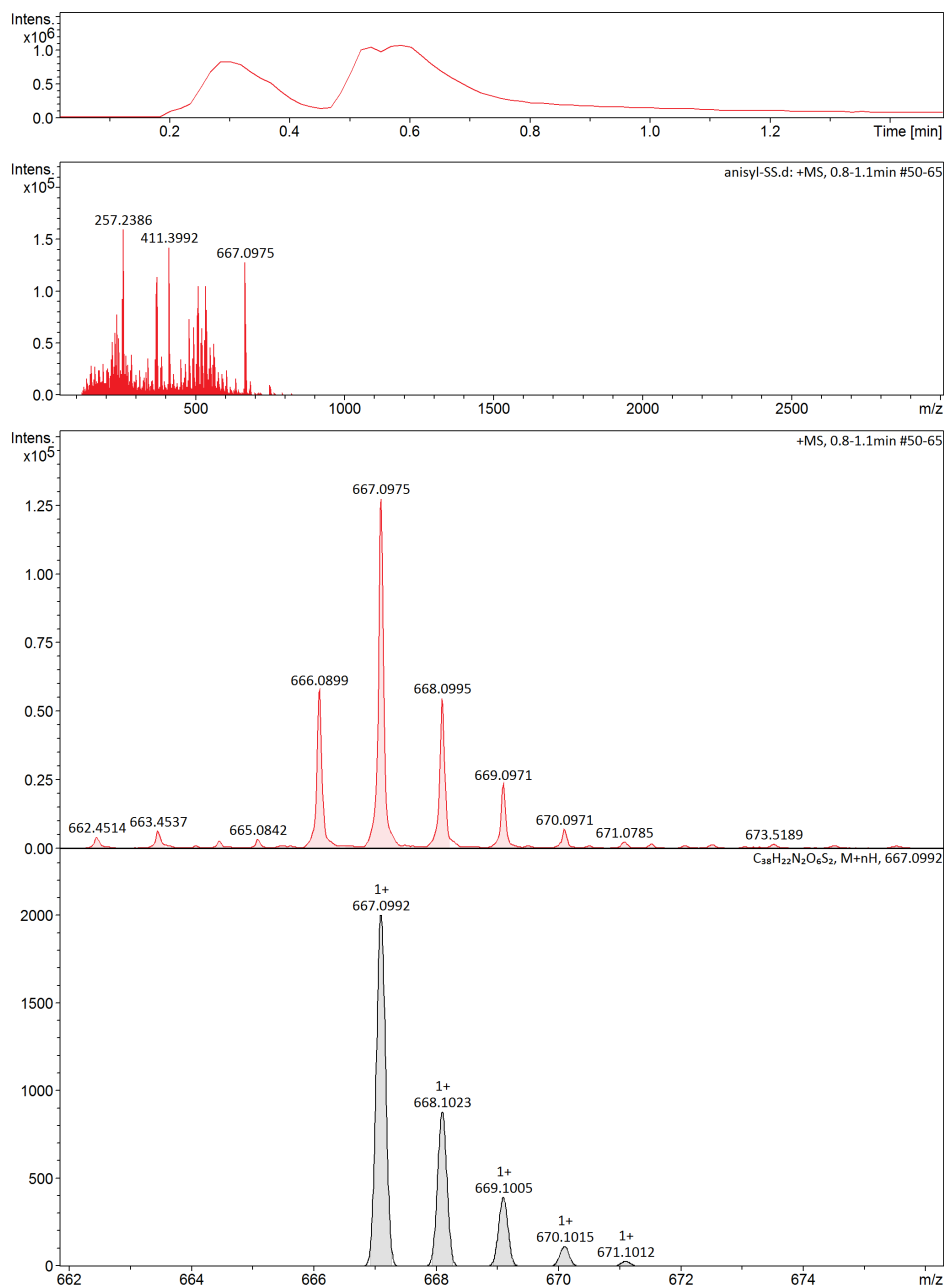

**Figure S28.** APCI-TOF mass spectrum of **13**.



## Generic Display Report (all)

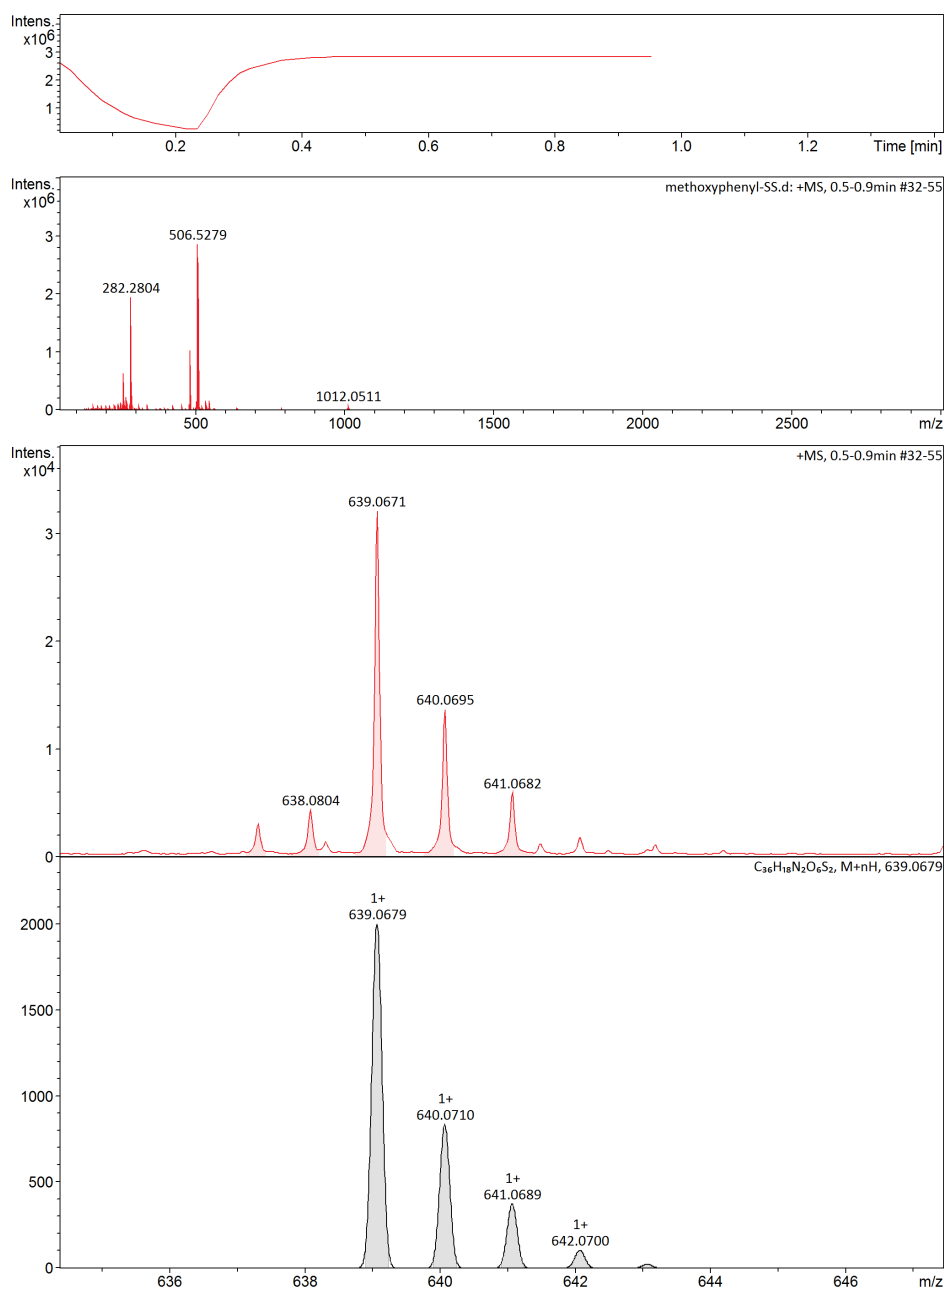

**Figure S29.** APCI-TOF mass spectrum of **14**.

## Generic Display Report (all)

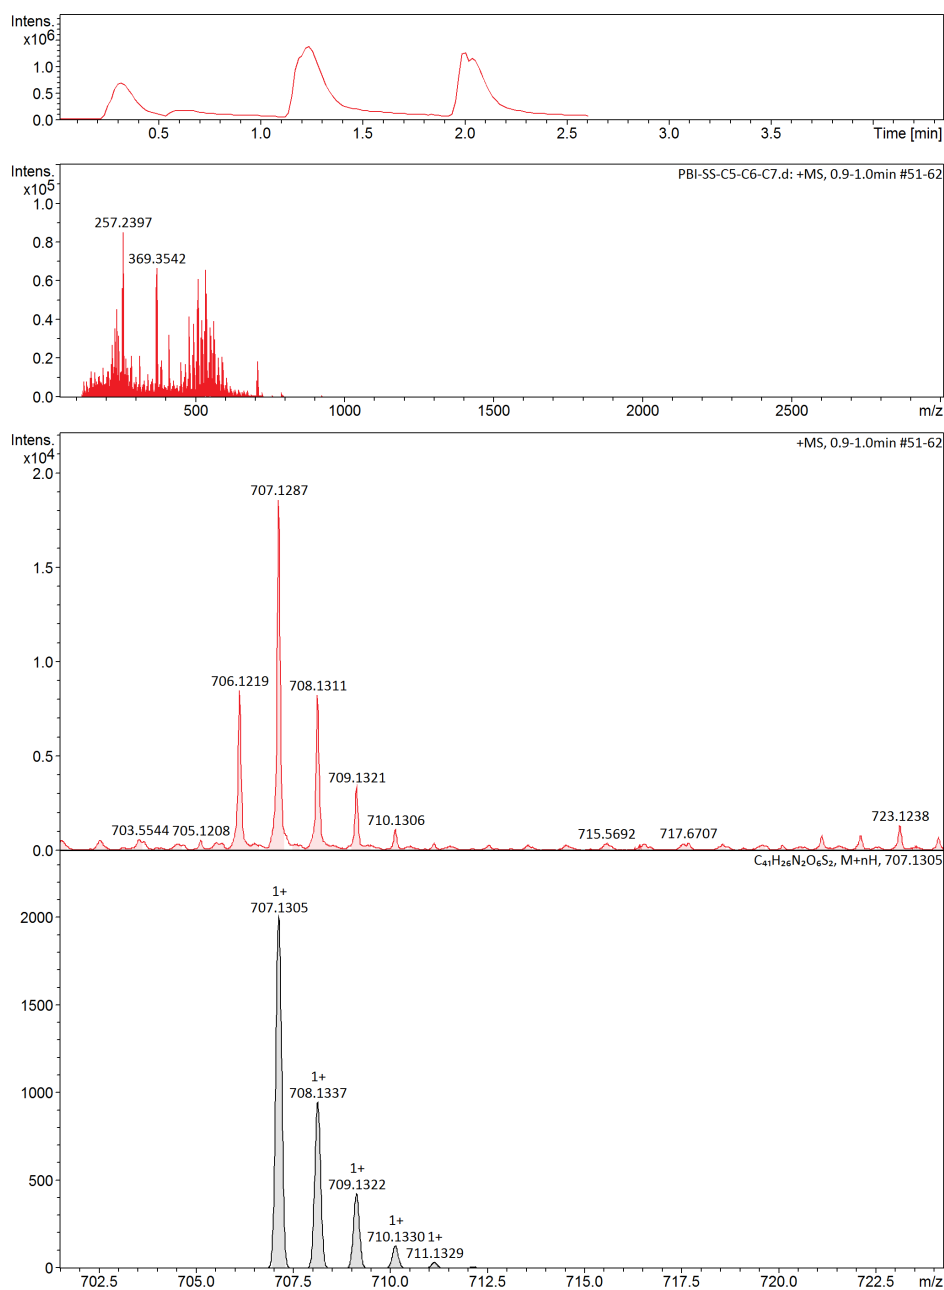

Bruker Compass DataAnalysis 4.2

printed: 12/18/2023 9:32:24 PM

by: BDAL@DE

Page 1 of 1

**Figure S30.** APCI-TOF mass spectrum of **15a**.

## Generic Display Report (all)

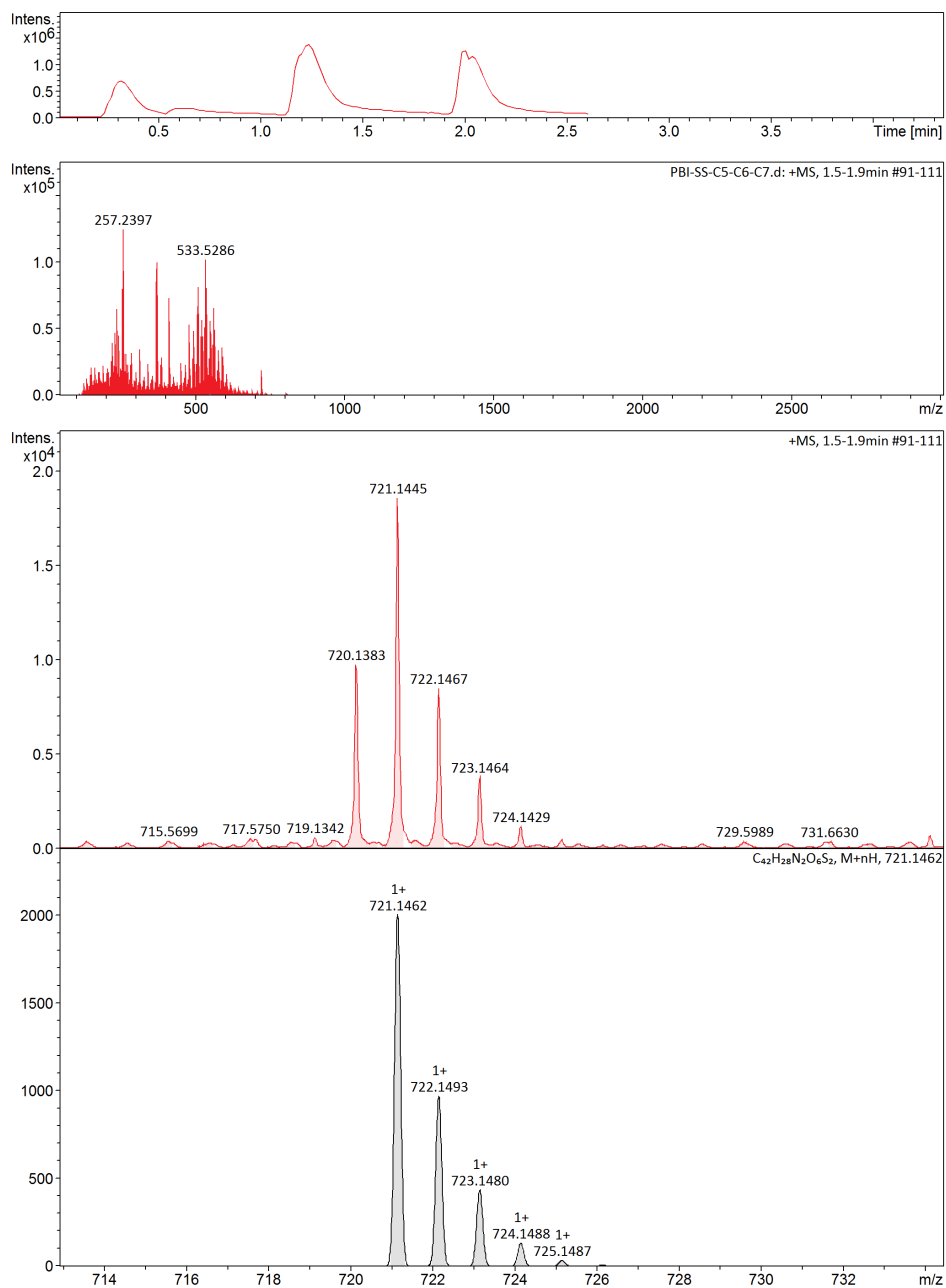

**Figure S31.** APCI-TOF mass spectrum of **15b**.

## Generic Display Report (all)

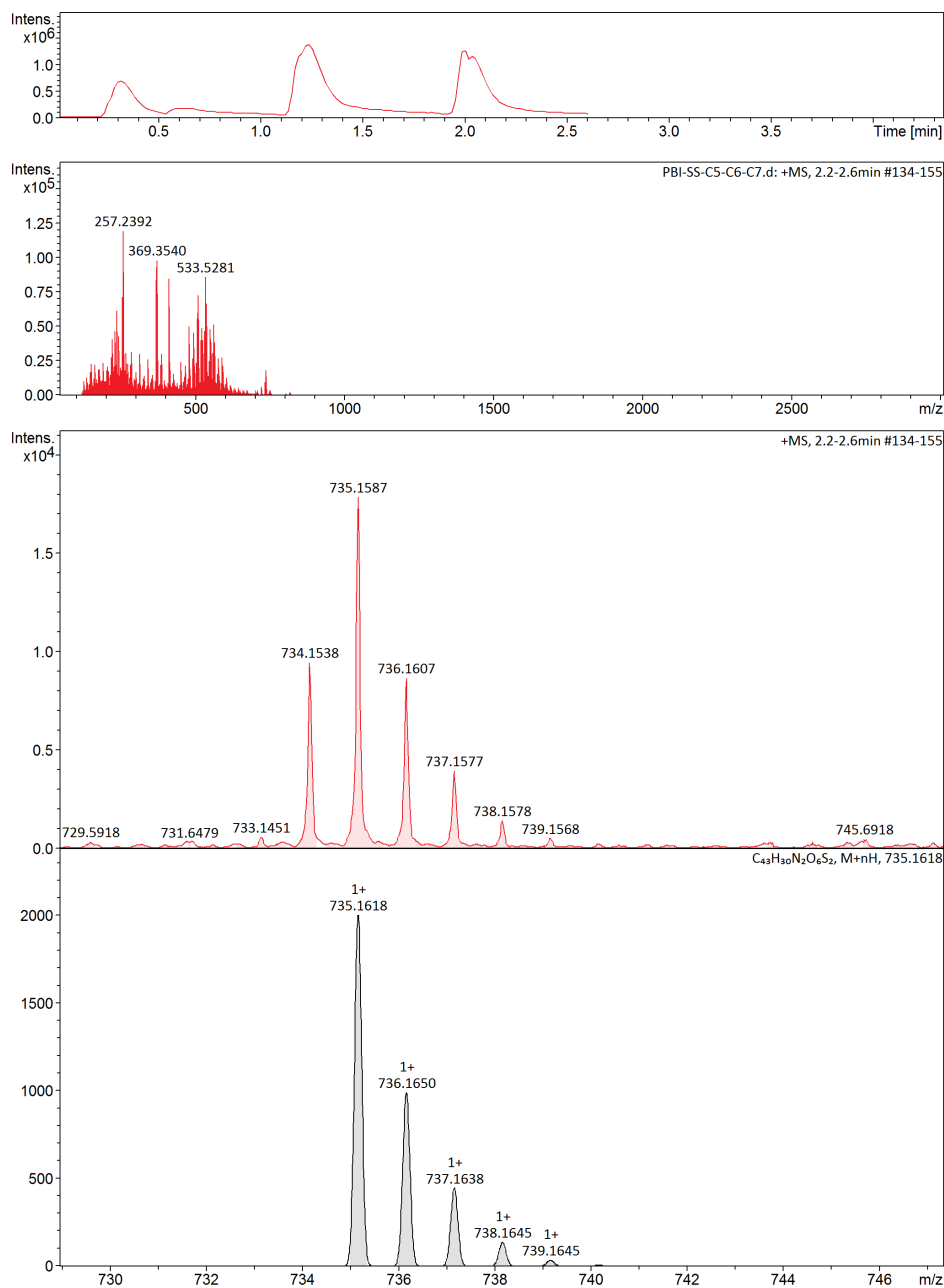

Figure S32. APCI-TOF mass spectrum of **15c**.

## Generic Display Report (all)

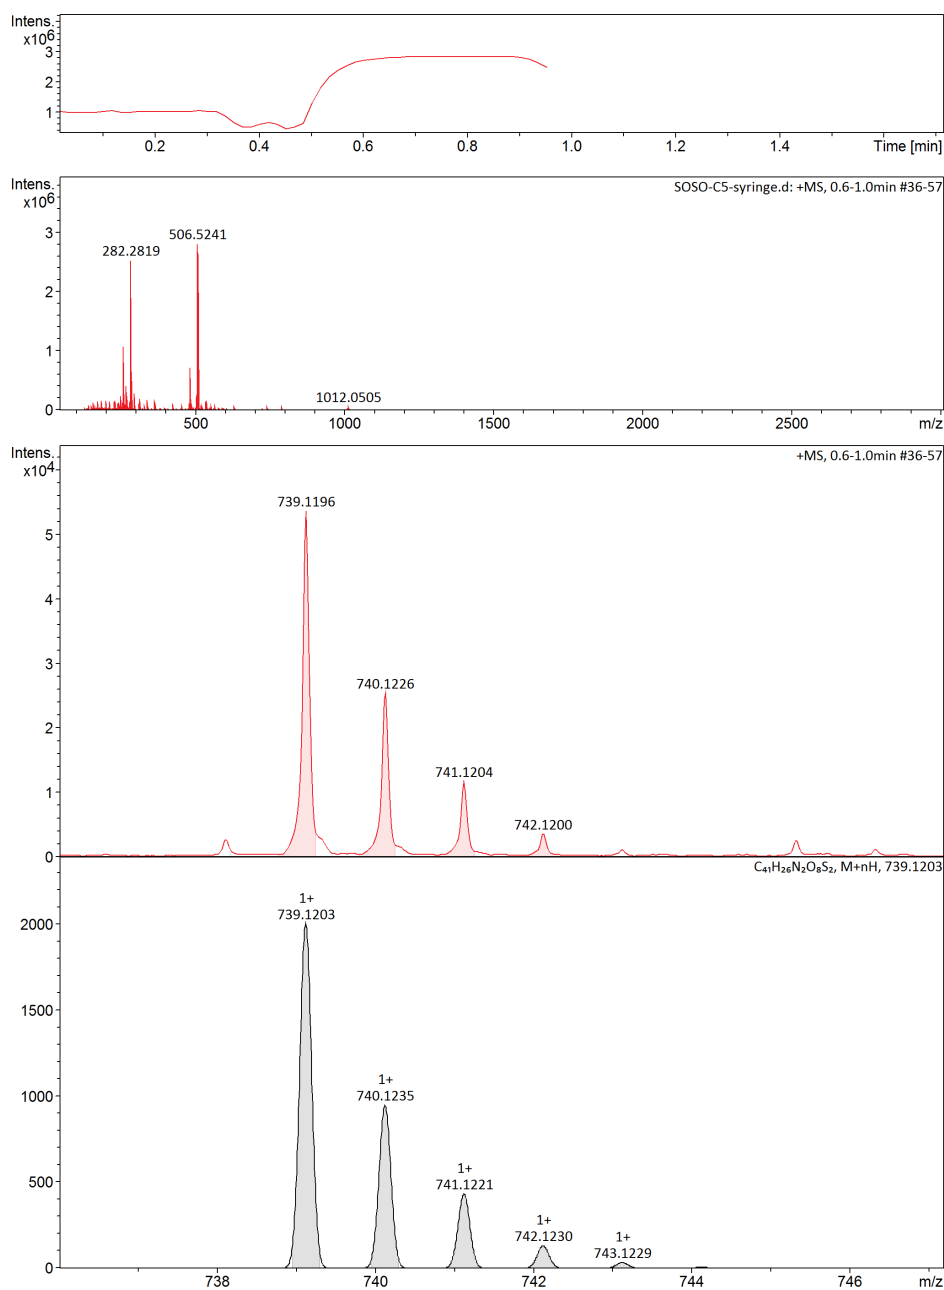

**Figure S33.** APCI-TOF mass spectrum of **4a**.

## Generic Display Report (all)

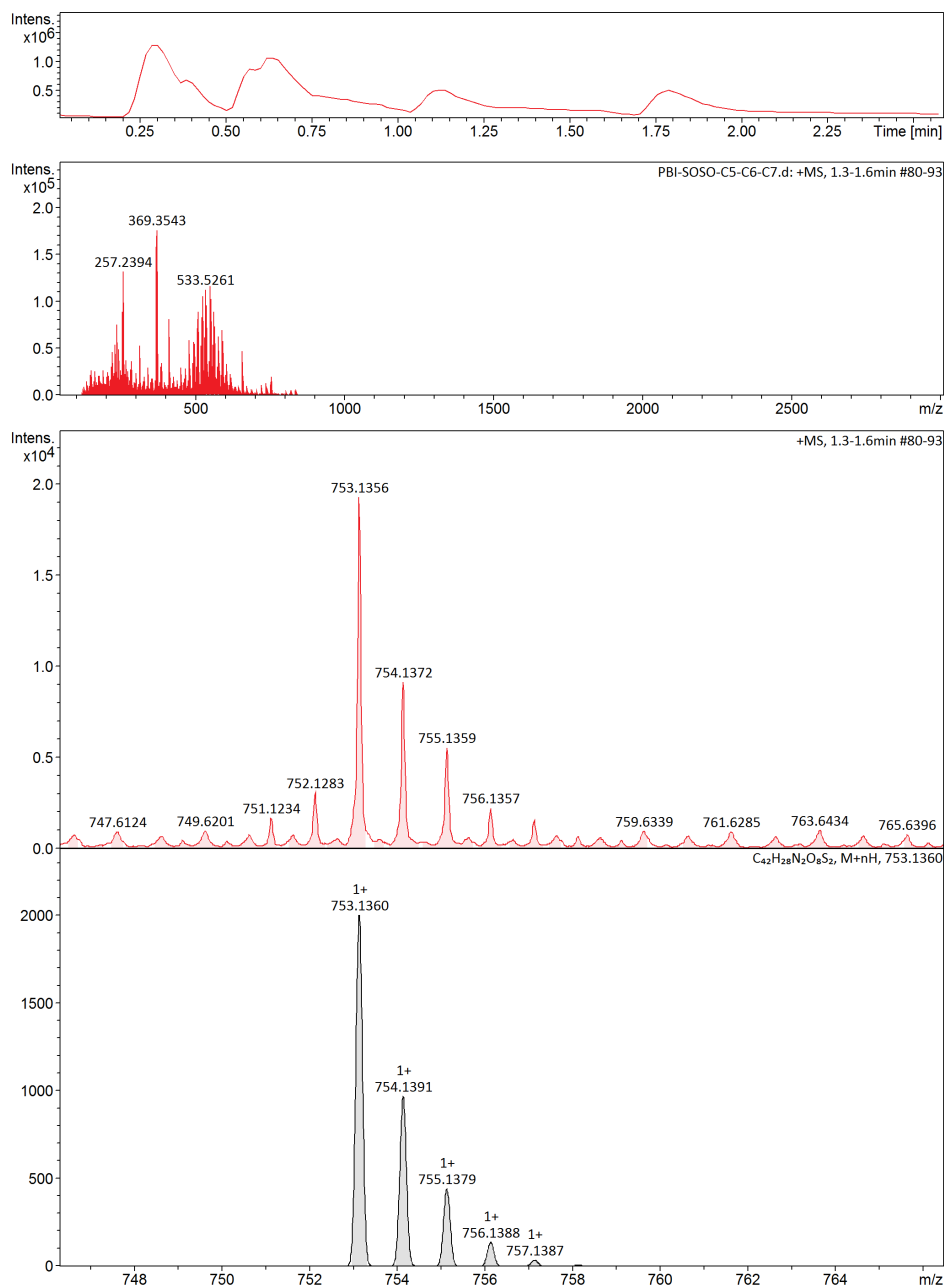

**Figure S34.** APCI-TOF mass spectrum of **4b**.

## Generic Display Report (all)

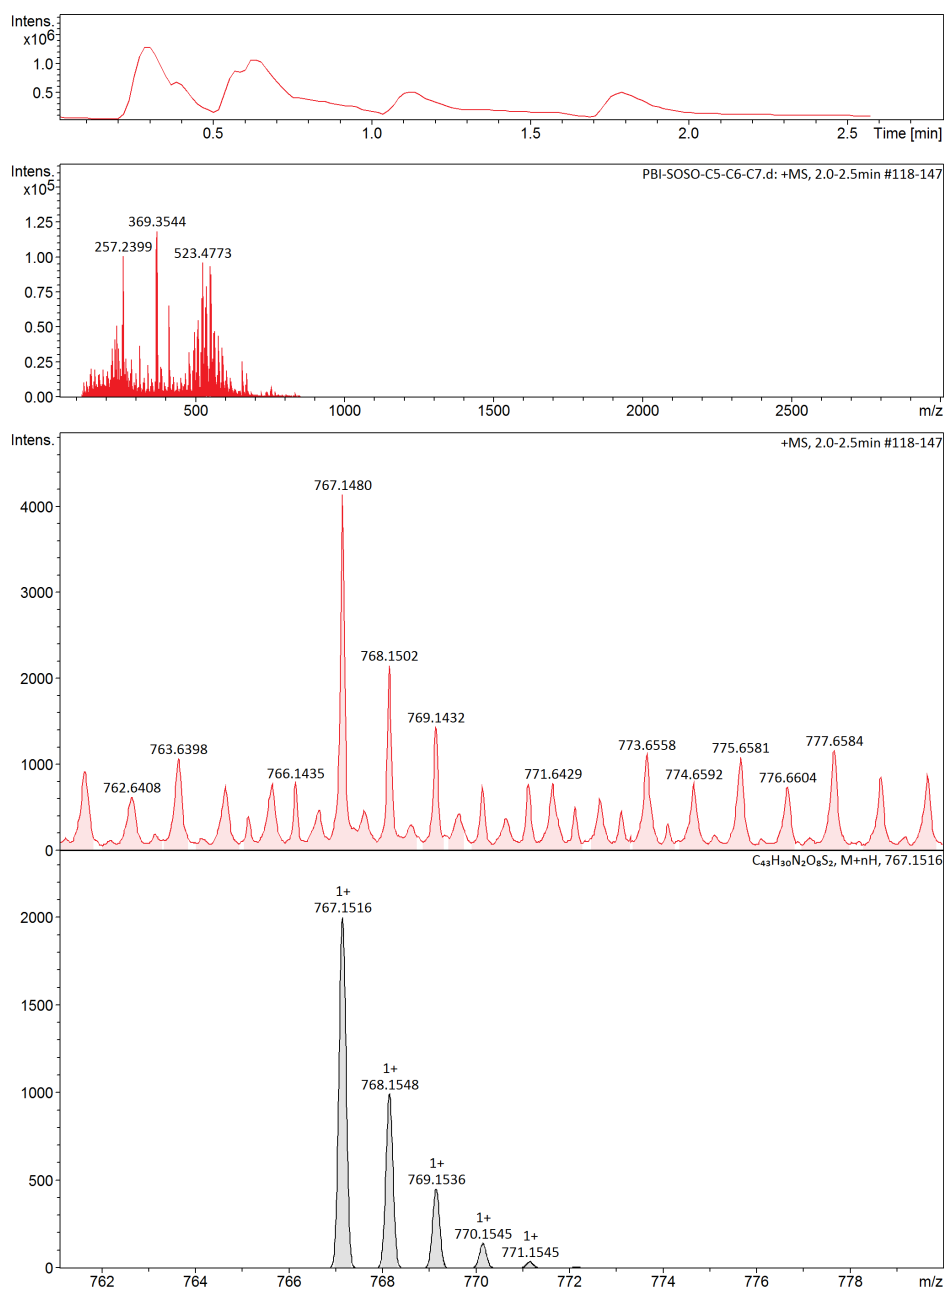

**Figure S35.** APCI-TOF mass spectrum of 4c.

## Generic Display Report (all)

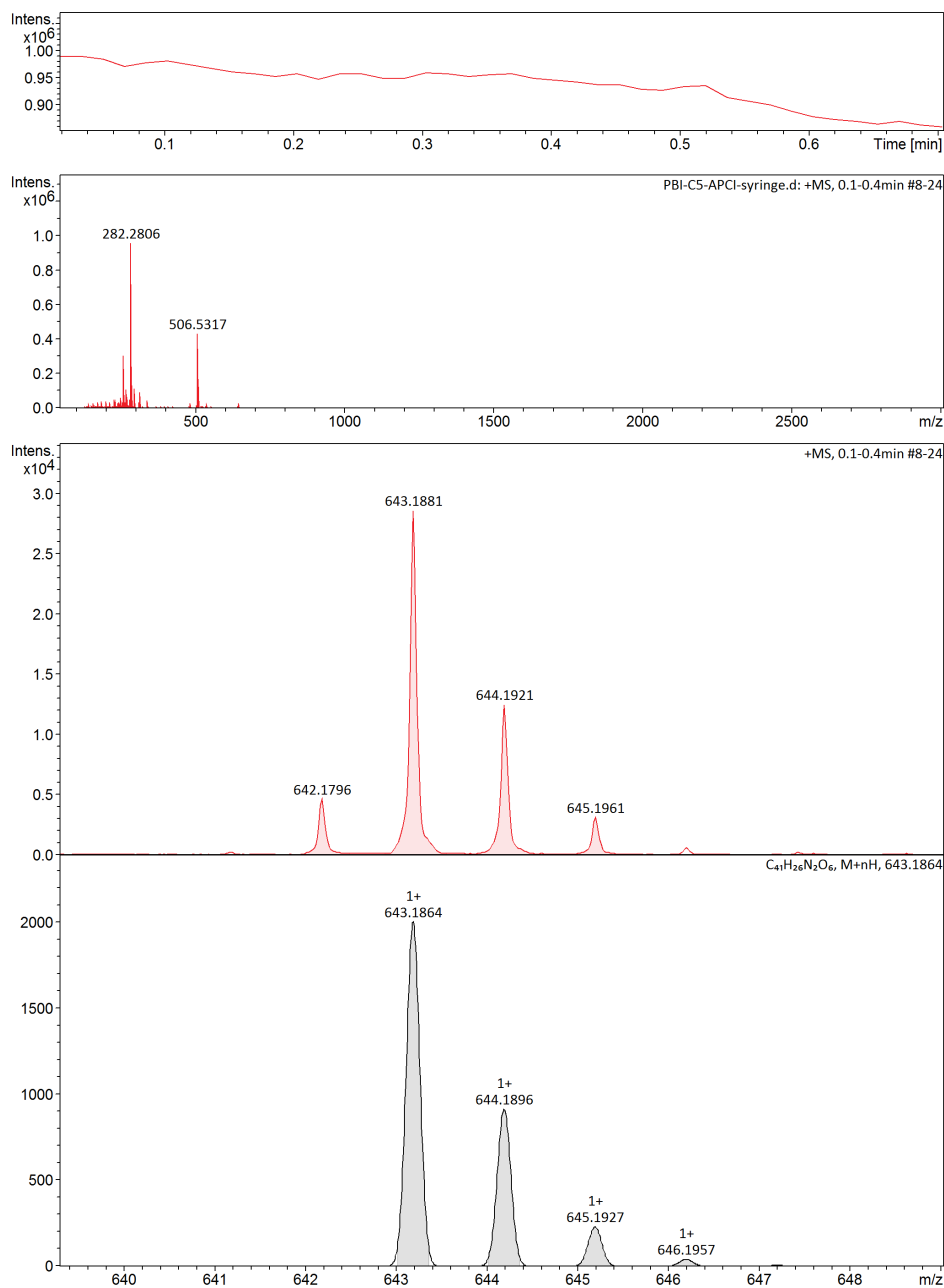

**Figure S36.** APCI-TOF mass spectrum of **5a**.



## Generic Display Report (all)

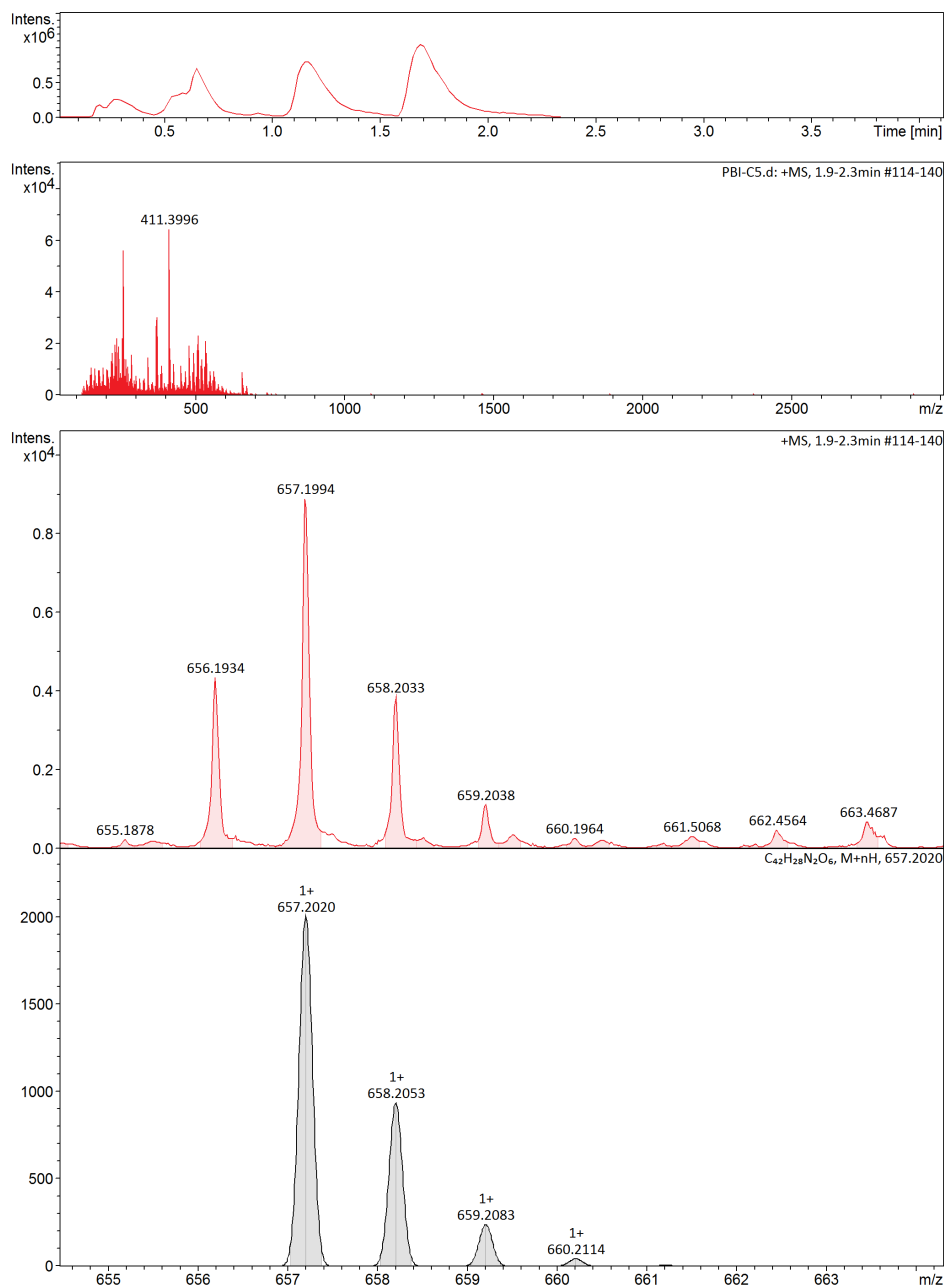

**Figure S37.** APCI-TOF mass spectrum of **5b**.

## Generic Display Report (all)

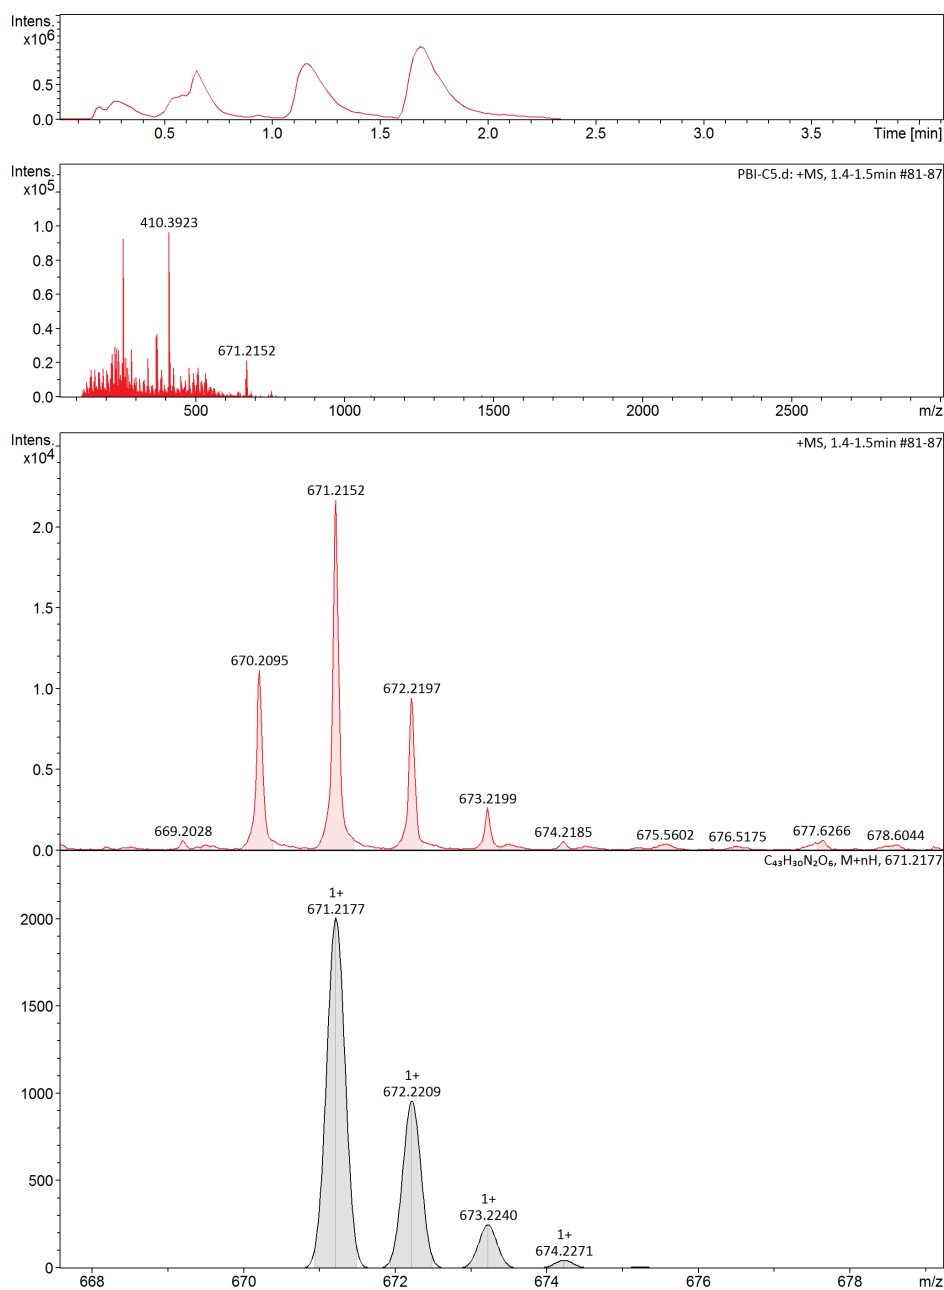

**Figure S38.** APCI-TOF mass spectrum of **5c**.

## 5. Crystal data

**Table S1.** Crystallographic data of **5a**, **5b**, and **5c**.

| Compound                                           | <b>5a</b>                                                     | <b>5b</b>                                                                         | <b>5c</b>                                                         |
|----------------------------------------------------|---------------------------------------------------------------|-----------------------------------------------------------------------------------|-------------------------------------------------------------------|
| Formula                                            | C <sub>41</sub> H <sub>26</sub> N <sub>2</sub> O <sub>6</sub> | C <sub>42</sub> H <sub>28</sub> N <sub>2</sub> O <sub>6</sub> , CHCl <sub>3</sub> | 2(C <sub>43</sub> H <sub>30</sub> N <sub>2</sub> O <sub>6</sub> ) |
| Formula weight                                     | 642.64                                                        | 776.03                                                                            | 1341.38                                                           |
| Crystal system                                     | monoclinic                                                    | monoclinic                                                                        | monoclinic                                                        |
| Space group                                        | <i>I</i> 12/a1 (No. 15)                                       | <i>P</i> 2 <sub>1</sub> / <i>a</i> (No. 14)                                       | <i>P</i> 12 <sub>1</sub> / <i>n</i> 1 (No. 14)                    |
| Crystal color                                      | red                                                           | red                                                                               | red                                                               |
| Crystal description                                | plate                                                         | plate                                                                             | block                                                             |
| <i>a</i> [Å]                                       | 15.7272(6)                                                    | 11.8210(5)                                                                        | 13.6337(3)                                                        |
| <i>b</i> [Å]                                       | 11.3327(3)                                                    | 24.9798(9)                                                                        | 11.8657(3)                                                        |
| <i>c</i> [Å]                                       | 20.9939(8)                                                    | 12.1425(5)                                                                        | 19.1562(5)                                                        |
| $\alpha$ [°]                                       | —                                                             | —                                                                                 | —                                                                 |
| $\beta$ [°]                                        | 109.582(4)                                                    | 106.628(4)                                                                        | 98.107(2)                                                         |
| $\gamma$ [°]                                       | —                                                             | —                                                                                 | —                                                                 |
| <i>V</i> [Å <sup>3</sup> ]                         | 3525.4(2)                                                     | 3435.6(2)                                                                         | 3067.99(13)                                                       |
| <i>Z</i>                                           | 4                                                             | 4                                                                                 | 2                                                                 |
| <i>d</i> <sub>calcd</sub> [g cm <sup>-3</sup> ]    | 1.328                                                         | 1.500                                                                             | 1.452                                                             |
| <i>R</i> <sub>1</sub> ( <i>I</i> > 2σ( <i>I</i> )) | 0.0499                                                        | 0.0619                                                                            | 0.0562                                                            |
| <i>wR</i> <sub>2</sub> (all data)                  | 0.1238                                                        | 0.1800                                                                            | 0.1435                                                            |
| Goodness-of-fit                                    | 1.013                                                         | 1.146                                                                             | 1.029                                                             |
| Temperature [K]                                    | 93(2)                                                         | 93(2)                                                                             | 93(2)                                                             |
| CCDC No.                                           | 2348376                                                       | 2348377                                                                           | 2348378                                                           |

**Table S2.** Crystallographic data of **10** and **11**.

| Compound                                           | <b>10</b>                                                                                                                                                                         | <b>11</b>                                                                    |
|----------------------------------------------------|-----------------------------------------------------------------------------------------------------------------------------------------------------------------------------------|------------------------------------------------------------------------------|
| Formula                                            | C <sub>40</sub> H <sub>26</sub> N <sub>2</sub> O <sub>4</sub> S <sub>2</sub> ,<br>2.73(CH <sub>3</sub> C <sub>6</sub> H <sub>5</sub> ),<br>0.27(CH <sub>2</sub> Cl <sub>2</sub> ) | C <sub>40</sub> H <sub>26</sub> N <sub>2</sub> O <sub>6</sub> S <sub>2</sub> |
| Formula weight                                     | 593.20                                                                                                                                                                            | 933.48                                                                       |
| Crystal system                                     | triclinic                                                                                                                                                                         | triclinic                                                                    |
| Space group                                        | <i>P</i> -1 (No. 2)                                                                                                                                                               | <i>P</i> -1 (No. 2)                                                          |
| Crystal color                                      | yellow                                                                                                                                                                            | colorless                                                                    |
| Crystal description                                | plate                                                                                                                                                                             | block                                                                        |
| <i>a</i> [Å]                                       | 12.9868(4)                                                                                                                                                                        | 10.1116(10)                                                                  |
| <i>b</i> [Å]                                       | 13.0586(5)                                                                                                                                                                        | 13.6115(9)                                                                   |
| <i>c</i> [Å]                                       | 14.4262(4)                                                                                                                                                                        | 15.4513(13)                                                                  |
| <i>α</i> [°]                                       | 80.800(3)                                                                                                                                                                         | 83.734(6)                                                                    |
| <i>β</i> [°]                                       | 81.409(3)                                                                                                                                                                         | 73.598(8)                                                                    |
| <i>γ</i> [°]                                       | 74.562(3)                                                                                                                                                                         | 68.554(7)                                                                    |
| <i>V</i> [Å <sup>3</sup> ]                         | 2313.21(14)                                                                                                                                                                       | 1898.8(3)                                                                    |
| <i>Z</i>                                           | 2                                                                                                                                                                                 | 2                                                                            |
| <i>d</i> <sub>calcd</sub> [g cm <sup>-3</sup> ]    | 1.369                                                                                                                                                                             | 1.633                                                                        |
| <i>R</i> <sub>1</sub> ( <i>I</i> > 2σ( <i>I</i> )) | 0.0835                                                                                                                                                                            | 0.0781                                                                       |
| <i>wR</i> <sub>2</sub> (all data)                  | 0.2766                                                                                                                                                                            | 0.2468                                                                       |
| Goodness-of-fit                                    | 1.044                                                                                                                                                                             | 1.037                                                                        |
| Temperature [K]                                    | 93(2)                                                                                                                                                                             | 93(2)                                                                        |
| CCDC No.                                           | 2348379                                                                                                                                                                           | 2348380                                                                      |

## 6. Electrochemical properties

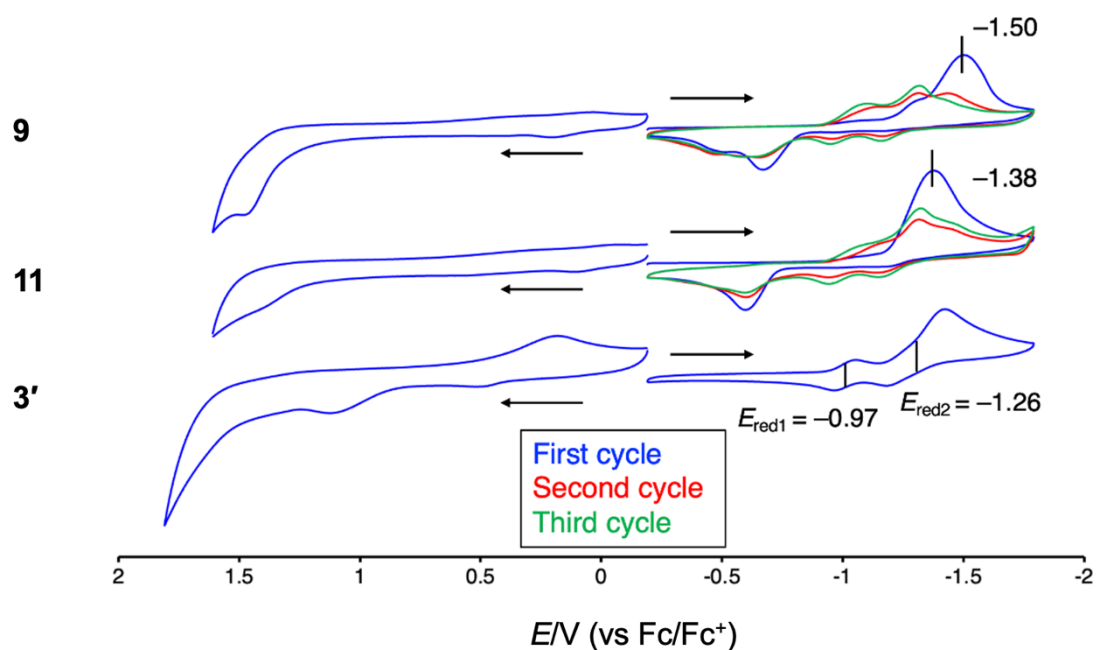

Figure S39. Cyclic voltammograms of **3'**, **9**, and **11**.

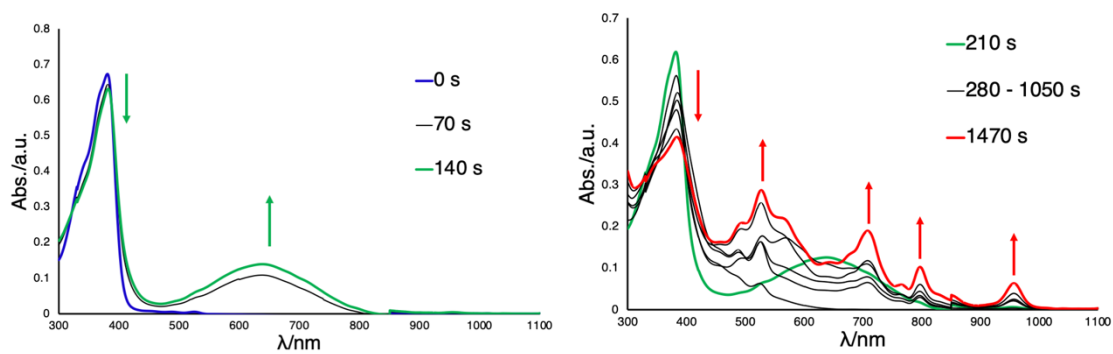

Figure S40. Spectroelectrochemical absorption spectra of **11** in  $CH_2Cl_2$  using  $[Bu_4N][PF_6]$  as the supporting electrolyte at  $-1.2$  V (vs  $Fc/Fc^+$ ).

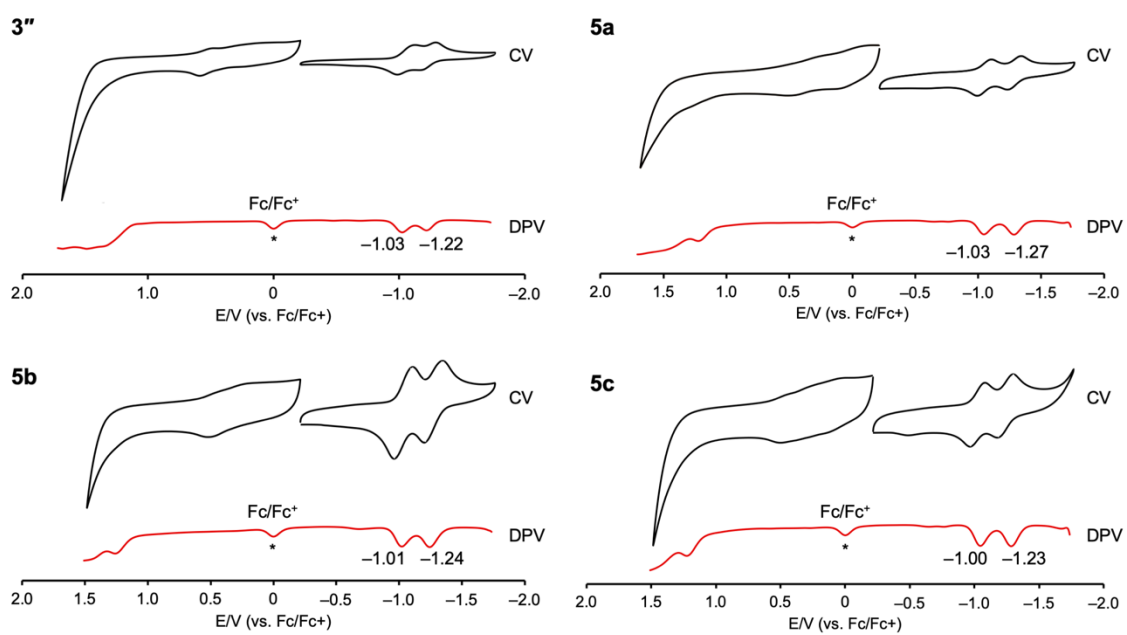

**Figure S41.** Cyclic voltammograms of **3'**, **5a**, **5b**, and **5c**.

## 7. Thermal analysis

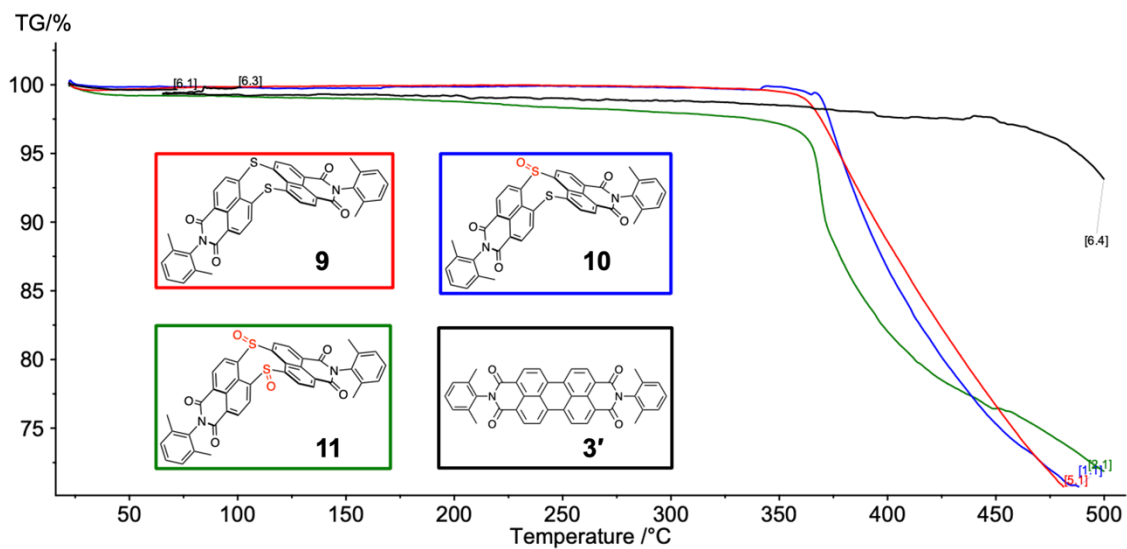

Figure S42. Thermogravimetric analysis (TGA) profiles of 3', 9, 10, and 11.

## 8. DFT Calculations

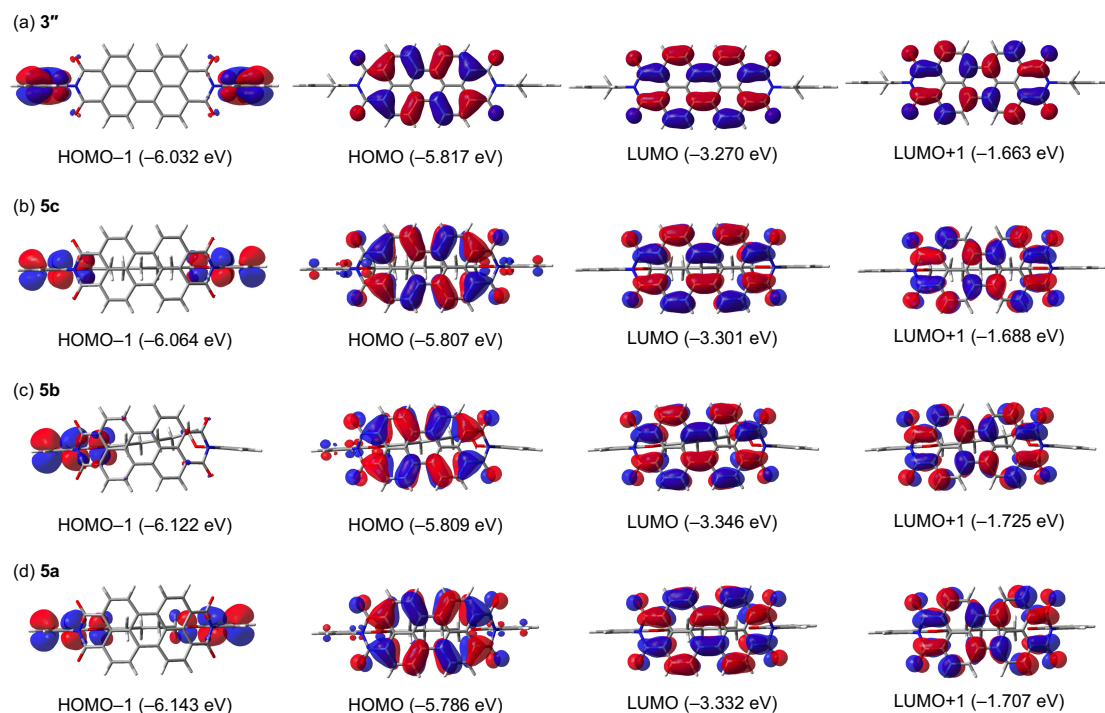

**Figure S43.** Calculated molecular orbitals of **3''**, **5a**, **5b**, and **5c** (isovalue = 0.02, B3LYP/6-31G(d)).

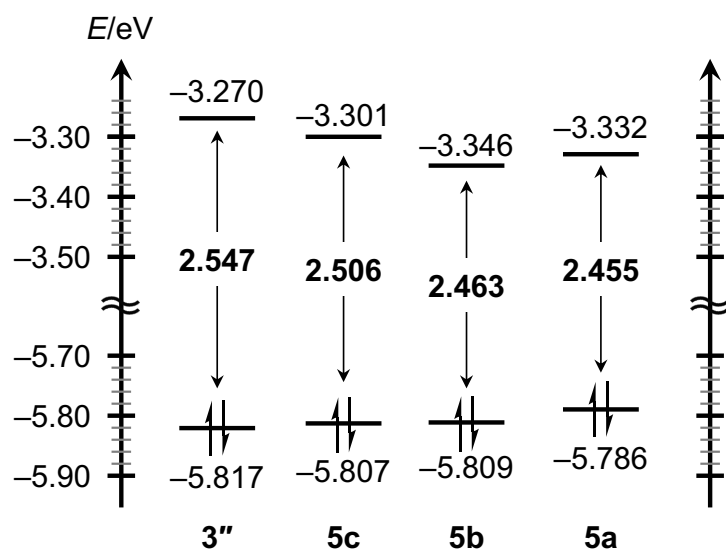

**Figure S44.** Energy diagrams of **3''**, **5a**, **5b**, and **5c** (B3LYP/6-31G(d)).



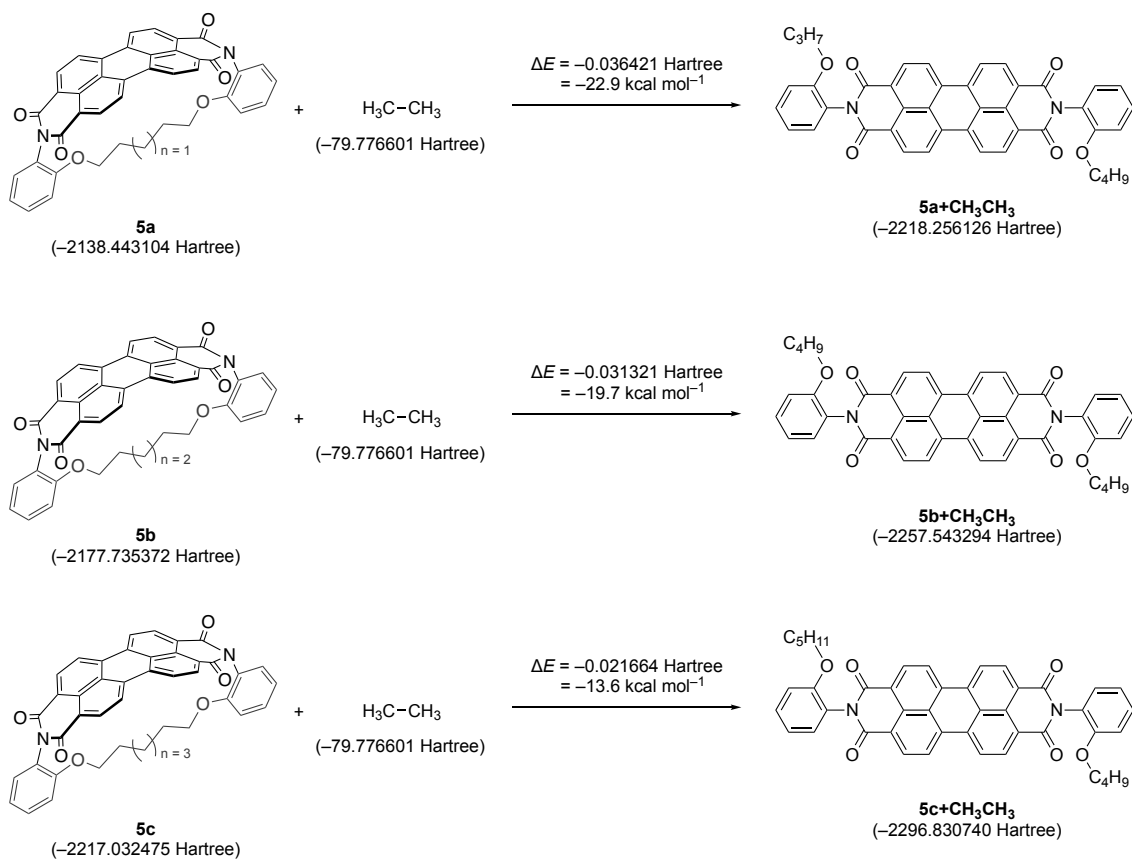

**Figure S45.** Hypothetical homodesmotic reactions (B3LYP/6-31G(d)).

**Table S3.** Simulated  $^1\text{H}$  NMR chemical shifts calculated at the B3LYP/6-31G(d) level. The chemical shifts were averaged for four equivalent protons.

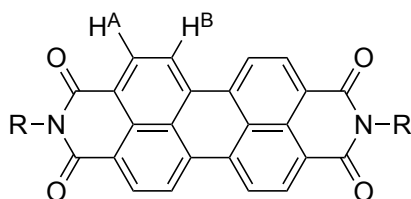

|           | $\text{H}^{\text{A}}$ (ppm) | $\text{H}^{\text{B}}$ (ppm) |
|-----------|-----------------------------|-----------------------------|
| <b>5a</b> | 8.49                        | 8.28                        |
| <b>5b</b> | 8.52                        | 8.30                        |
| <b>5c</b> | 8.54                        | 8.35                        |
| <b>3</b>  | 8.60                        | 8.40                        |

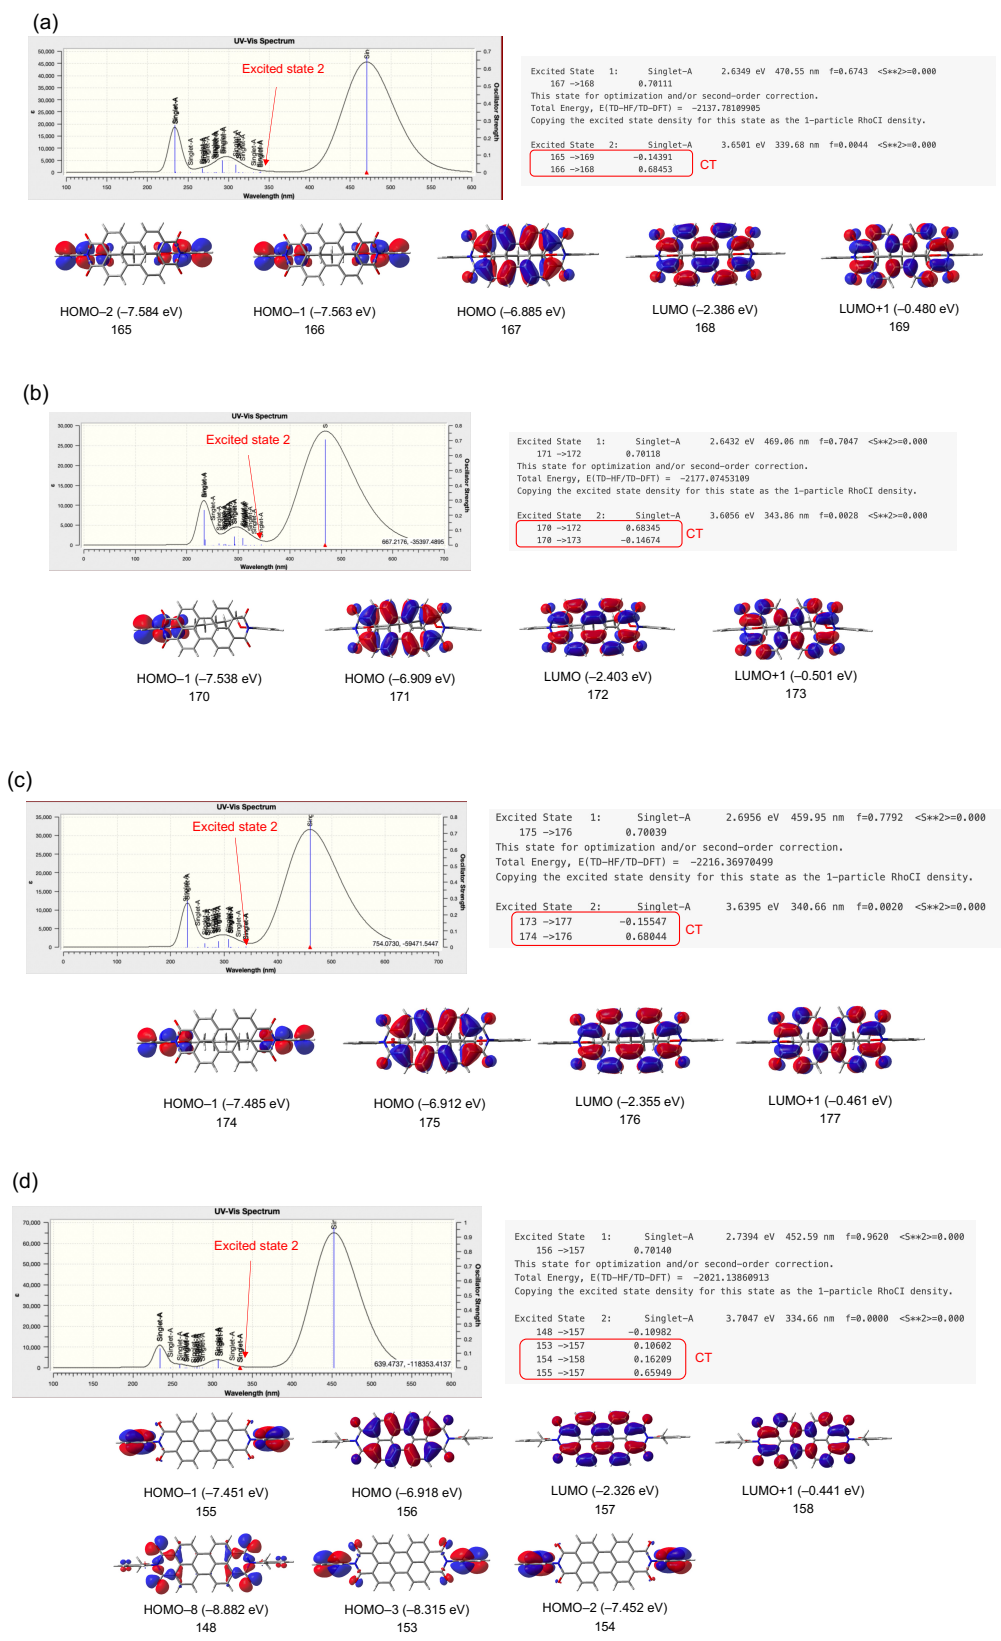

Figure S46. Results of TD-DFT calculations of (a) **5a**, (b) **5b**, (c) **5c**, and (d) **3''**. (B3LYP/6-31G(d)//CAM-B3LYP/6-31G(d)).

**Table S4.** Cartesian coordinate and geometry of **3''**.

|   |            |           |           |
|---|------------|-----------|-----------|
| O | 6.966945   | -0.002646 | -2.005822 |
| O | -6.966827  | -0.001912 | -2.005845 |
| O | 5.697872   | -2.288734 | 0.325989  |
| O | 5.697776   | 2.289732  | 0.322241  |
| N | -5.707245  | 0.000323  | 0.380448  |
| C | 3.57503    | -1.223641 | 0.345645  |
| O | -5.697805  | -2.288948 | 0.325821  |
| O | -5.697887  | 2.289522  | 0.32279   |
| N | 5.707226   | 0.000544  | 0.380435  |
| C | 2.862731   | 0.000457  | 0.345739  |
| C | -3.575006  | -1.223774 | 0.34565   |
| C | -2.862753  | 0.000352  | 0.345804  |
| C | 0.735411   | -1.249595 | 0.344822  |
| C | 7.78682    | -0.001175 | -0.919813 |
| C | -7.147641  | 0.000267  | 0.333219  |
| C | -7.786775  | -0.000923 | -0.919882 |
| C | -3.57505   | 1.224449  | 0.343907  |
| C | 1.481747   | -2.429635 | 0.344432  |
| H | 0.982539   | -3.39126  | 0.344273  |
| C | -9.923338  | 0.00019   | 0.215654  |
| H | -11.008618 | 0.000155  | 0.160255  |
| C | 3.574983   | 1.224581  | 0.34374   |
| C | -0.735386  | -1.249622 | 0.344823  |
| C | -1.432681  | 0.000377  | 0.344795  |
| C | 7.147621   | 0.000521  | 0.333247  |
| C | 0.735364   | 1.250427  | 0.342928  |
| C | 2.880576   | 2.421526  | 0.340446  |
| H | 3.443349   | 3.348965  | 0.337632  |
| C | 9.184333   | -0.001204 | -0.970334 |
| H | 9.700742   | -0.002471 | -1.923152 |
| C | -9.184281  | -0.00096  | -0.97048  |
| H | -9.700652  | -0.001878 | -1.923318 |
| C | -2.880687  | 2.421421  | 0.340657  |
| H | -3.443496  | 3.348838  | 0.337951  |
| C | 1.481656   | 2.430493  | 0.340712  |
| H | 0.982414   | 3.392099  | 0.339096  |
| C | 5.058795   | 1.250232  | 0.342369  |
| C | -5.058861  | 1.250045  | 0.342642  |
| C | -0.735433  | 1.2504    | 0.342969  |
| C | 1.432659   | 0.00043   | 0.344763  |
| C | 9.287508   | 0.00216   | 1.454572  |
| H | 9.865929   | 0.003453  | 2.373118  |
| C | -9.287587  | 0.001385  | 1.454424  |
| H | -9.866054  | 0.002293  | 2.372942  |
| C | 5.05884    | -1.249236 | 0.344388  |
| C | -5.058817  | -1.249423 | 0.344342  |
| C | 7.891856   | 0.002175  | 1.5047    |
| H | 7.368462   | 0.003475  | 2.456006  |
| C | -2.880599  | -2.420723 | 0.344153  |
| H | -3.443372  | -3.348164 | 0.342751  |
| C | 9.923328   | 0.00046   | 0.215831  |
| H | 11.008611  | 0.000423  | 0.160494  |
| C | -7.891932  | 0.001417  | 1.504629  |

|   |           |           |           |
|---|-----------|-----------|-----------|
| H | -7.368596 | 0.002331  | 2.455967  |
| C | -1.481768 | 2.430439  | 0.340843  |
| H | -0.982559 | 3.392062  | 0.33924   |
| C | 2.880666  | -2.420617 | 0.344191  |
| H | 3.443474  | -3.348037 | 0.34284   |
| C | -1.481679 | -2.42969  | 0.344409  |
| H | -0.982436 | -3.391297 | 0.344243  |
| C | 7.560131  | -0.004809 | -3.295689 |
| H | 8.174175  | -0.900734 | -3.453446 |
| H | 6.730254  | -0.006052 | -4.004392 |
| H | 8.17408   | 0.890643  | -3.456495 |
| C | -7.559927 | -0.003432 | -3.295751 |
| H | -8.173965 | 0.892041  | -3.456106 |
| H | -6.730006 | -0.004191 | -4.004404 |
| H | -8.173866 | -0.899335 | -3.454046 |

Negative frequency = zero

Sum of electronic and thermal free energies = -2021.807876 Hartree

**Table S5.** Cartesian coordinate and geometry of **5a**.

|   |           |           |           |
|---|-----------|-----------|-----------|
| O | -3.60828  | 1.697052  | -0.000915 |
| O | 3.608299  | 1.697071  | -0.000842 |
| O | -5.291216 | -0.545418 | 2.284631  |
| O | -5.29172  | -0.545629 | -2.284193 |
| N | 5.19382   | -0.389193 | -0.000097 |
| C | -3.460201 | -1.626067 | 1.224832  |
| O | 5.291689  | -0.546081 | 2.28428   |
| O | 5.291235  | -0.545012 | -2.284551 |
| C | 0.000015  | 2.846974  | -0.000249 |
| H | 0.000245  | 3.504342  | 0.880833  |
| H | -0.000206 | 3.504334  | -0.881337 |
| N | -5.19383  | -0.389193 | 0.000215  |
| C | -2.789115 | -1.859369 | 0.00003   |
| C | 3.460339  | -1.626236 | 1.224546  |
| C | 2.789106  | -1.859372 | -0.000211 |
| C | -0.734322 | -2.380918 | 1.250594  |
| C | -4.935664 | 2.015595  | -0.000203 |
| C | 5.818537  | 0.910688  | 0.000112  |
| C | 1.262959  | 1.966427  | -0.000598 |
| H | 1.247884  | 1.309193  | -0.879135 |
| H | 1.248032  | 1.30865   | 0.877537  |
| C | 4.935702  | 2.015616  | -0.000263 |
| C | -2.598305 | 2.711803  | -0.000163 |
| H | -2.70556  | 3.347026  | 0.890526  |
| H | -2.704836 | 3.347618  | -0.89053  |
| C | 3.460184  | -1.625817 | -1.224973 |
| C | -1.48267  | -2.313415 | 2.428285  |
| H | -1.002875 | -2.462522 | 3.388752  |
| C | 6.845163  | 3.490285  | 0.000849  |
| H | 7.244338  | 4.500989  | 0.001089  |
| C | -3.460351 | -1.625986 | -1.224683 |
| C | 0.734423  | -2.380973 | 1.250514  |
| C | 1.416623  | -2.246552 | -0.000202 |
| C | -5.818537 | 0.91069   | 0.000212  |
| C | -1.262966 | 1.966462  | 0.000054  |
| H | -1.248004 | 1.308752  | -0.878128 |
| H | -1.247939 | 1.309181  | 0.878549  |
| C | -0.73444  | -2.380756 | -1.25081  |
| C | -2.828451 | -1.927468 | -2.419347 |
| H | -3.366034 | -1.769263 | -3.348402 |
| C | -5.457495 | 3.309666  | -0.000048 |
| H | -4.797082 | 4.170064  | -0.000418 |
| C | 5.45755   | 3.309664  | 0.000066  |
| H | 4.797164  | 4.170075  | -0.000281 |
| C | 2.828168  | -1.927153 | -2.419607 |
| H | 3.365633  | -1.768764 | -3.348704 |
| C | -1.482924 | -2.313204 | -2.428411 |
| H | -1.003236 | -2.462243 | -3.38894  |
| C | -4.728927 | -0.859353 | -1.248794 |
| C | 4.728683  | -0.859028 | -1.249103 |
| C | 0.734315  | -2.380695 | -1.250886 |
| C | -1.416633 | -2.246544 | -0.000065 |
| C | -7.711917 | 2.400137  | 0.000859  |

|   |           |           |           |
|---|-----------|-----------|-----------|
| H | -8.78662  | 2.552998  | 0.001301  |
| C | 7.711957  | 2.400087  | 0.001312  |
| H | 8.786665  | 2.552921  | 0.00197   |
| C | -4.728724 | -0.859283 | 1.249098  |
| C | 4.728937  | -0.859592 | 1.24879   |
| C | 2.598284  | 2.711775  | -0.000427 |
| H | 2.705115  | 3.347528  | -0.890801 |
| H | 2.70516   | 3.347071  | 0.890259  |
| C | -7.190069 | 1.102585  | 0.000715  |
| H | -7.840923 | 0.234554  | 0.001032  |
| C | 2.828424  | -1.927897 | 2.419156  |
| H | 3.366011  | -1.769866 | 3.348243  |
| C | -6.845093 | 3.490315  | 0.000489  |
| H | -7.244244 | 4.501028  | 0.000617  |
| C | 7.190069  | 1.102537  | 0.000955  |
| H | 7.840906  | 0.234492  | 0.001338  |
| C | 1.482661  | -2.31295  | -2.428566 |
| H | 1.002867  | -2.461863 | -3.389062 |
| C | -2.828181 | -1.92763  | 2.419406  |
| H | -3.365642 | -1.769443 | 3.34854   |
| C | 1.48289   | -2.313594 | 2.428139  |
| H | 1.003172  | -2.462744 | 3.388637  |

Negative frequency = zero

Sum of electronic and thermal free energies = -2138.443104 Hartree

**Table S6.** Cartesian coordinate and geometry of **5b**.

|   |           |           |           |
|---|-----------|-----------|-----------|
| O | -3.81405  | 1.63562   | -0.157626 |
| O | 4.150358  | 1.946422  | -0.259296 |
| O | -5.548973 | -0.353018 | 2.247532  |
| O | -5.489376 | -0.852852 | -2.291855 |
| N | 5.114665  | -0.586462 | -0.018498 |
| C | -3.682506 | -1.503579 | 1.333846  |
| O | 5.08447   | -0.189118 | 2.23563   |
| O | 5.246456  | -1.180151 | -2.228557 |
| C | -0.277563 | 2.973344  | -0.004593 |
| H | -0.452377 | 3.745466  | 0.759614  |
| H | -0.243408 | 3.502203  | -0.9682   |
| N | -5.416627 | -0.437992 | -0.038846 |
| C | -2.99531  | -1.862527 | 0.149236  |
| C | 3.254983  | -1.413382 | 1.350553  |
| C | 2.597496  | -1.848073 | 0.174581  |
| C | -0.942921 | -2.18005  | 1.465432  |
| C | -5.139334 | 1.953552  | -0.251565 |
| C | 6.048127  | 0.493089  | -0.207941 |
| C | 1.092202  | 2.316665  | 0.261957  |
| H | 1.303376  | 1.562622  | -0.506793 |
| H | 1.054068  | 1.779984  | 1.221089  |
| C | 5.51731   | 1.793031  | -0.297392 |
| C | -2.816045 | 2.66238   | -0.184767 |
| H | -3.004645 | 3.383591  | 0.623111  |
| H | -2.865151 | 3.201797  | -1.141461 |
| C | 3.29411   | -1.861635 | -1.058015 |
| C | -1.702598 | -1.996102 | 2.622914  |
| H | -1.228707 | -2.024792 | 3.597386  |
| C | 7.761788  | 2.647352  | -0.591324 |
| H | 8.427626  | 3.491752  | -0.747505 |
| C | -3.657468 | -1.783871 | -1.099851 |
| C | 0.524169  | -2.138035 | 1.47068   |
| C | 1.217506  | -2.204885 | 0.22102   |
| C | -6.031213 | 0.857584  | -0.187788 |
| C | -1.456229 | 1.984409  | -0.002825 |
| H | -1.327447 | 1.242763  | -0.801126 |
| H | -1.475646 | 1.42807   | 0.943058  |
| C | -0.923945 | -2.507685 | -1.014012 |
| C | -3.009407 | -2.210271 | -2.246428 |
| H | -3.53825  | -2.163815 | -3.192622 |
| C | -5.653014 | 3.242826  | -0.401979 |
| H | -4.988927 | 4.098397  | -0.455108 |
| C | 6.38784   | 2.868842  | -0.49153  |
| H | 5.98512   | 3.872602  | -0.587898 |
| C | 2.663605  | -2.336864 | -2.195674 |
| H | 3.221263  | -2.369289 | -3.12574  |
| C | -1.66076  | -2.582201 | -2.198254 |
| H | -1.170335 | -2.836167 | -3.13085  |
| C | -4.934685 | -1.041036 | -1.222408 |
| C | 4.62785   | -1.22869  | -1.178595 |
| C | 0.544362  | -2.526812 | -1.000245 |
| C | -1.617084 | -2.221495 | 0.204442  |
| C | -7.911875 | 2.34386   | -0.425154 |

|   |           |           |           |
|---|-----------|-----------|-----------|
| H | -8.984127 | 2.498811  | -0.493378 |
| C | 8.280362  | 1.35443   | -0.508456 |
| H | 9.34932   | 1.184965  | -0.594684 |
| C | -4.964947 | -0.764953 | 1.259614  |
| C | 4.555477  | -0.712367 | 1.265776  |
| C | 2.233356  | 3.347922  | 0.30377   |
| H | 2.338074  | 3.829744  | -0.677445 |
| H | 1.963825  | 4.143852  | 1.013595  |
| C | -7.399719 | 1.051397  | -0.274588 |
| H | -8.055216 | 0.18837   | -0.224033 |
| C | 2.600787  | -1.480898 | 2.568879  |
| H | 3.12859   | -1.163591 | 3.462085  |
| C | -7.037589 | 3.426161  | -0.487283 |
| H | -7.428333 | 4.433361  | -0.604761 |
| C | 7.4166    | 0.275596  | -0.320673 |
| H | 7.793805  | -0.73974  | -0.256364 |
| C | 1.304753  | -2.669864 | -2.162956 |
| H | 0.830662  | -2.965786 | -3.091701 |
| C | -3.057421 | -1.650762 | 2.56034   |
| H | -3.608933 | -1.401128 | 3.460699  |
| C | 1.255354  | -1.85781  | 2.627601  |
| H | 0.762244  | -1.834728 | 3.592361  |
| C | 3.605152  | 2.83354   | 0.738287  |
| H | 4.281084  | 3.68421   | 0.882626  |
| H | 3.545782  | 2.289614  | 1.691052  |

Negative frequency = zero

Sum of electronic and thermal free energies =  $-2177.735372$  Hartree



**Table S7.** Cartesian coordinate and geometry of **5c**.

|   |           |           |           |
|---|-----------|-----------|-----------|
| O | 5.533952  | -0.871727 | -2.288384 |
| O | -5.533814 | -0.867552 | 2.288808  |
| O | -5.534158 | -0.872258 | -2.288239 |
| O | -4.643618 | 1.661017  | -0.002126 |
| O | 5.534016  | -0.867958 | 2.288691  |
| O | 4.643577  | 1.660923  | -0.000353 |
| N | 5.51733   | -0.777917 | 0.000086  |
| N | -5.51723  | -0.777845 | 0.000191  |
| C | -2.836824 | -1.722271 | 0.000975  |
| C | -4.933361 | -1.084896 | -1.248115 |
| C | -0.735214 | -2.038152 | -1.249084 |
| C | -1.427121 | -1.955265 | 0.001152  |
| C | -6.000898 | 1.589223  | -0.00202  |
| C | 6.509833  | 0.271197  | -0.000845 |
| C | -0.735172 | -2.036123 | 1.251497  |
| C | -2.863762 | -1.771186 | -2.418714 |
| H | -3.417025 | -1.676076 | -3.347082 |
| C | 4.933334  | -1.082612 | 1.248913  |
| C | -3.535374 | -1.582824 | -1.222887 |
| C | -7.875048 | 0.042781  | -0.000583 |
| H | -8.239526 | -0.979304 | 0.000397  |
| C | 2.836852  | -1.722252 | 0.000892  |
| C | -6.880463 | 2.670741  | -0.003096 |
| H | -6.501949 | 3.687687  | -0.004137 |
| C | 0.735245  | -2.036148 | 1.251469  |
| C | 4.933276  | -1.084666 | -1.248259 |
| C | 2.863686  | -1.771011 | -2.418808 |
| H | 3.416901  | -1.675806 | -3.347195 |
| C | 3.53534   | -1.582692 | -1.222997 |
| C | 1.483719  | -2.000099 | 2.43006   |
| H | 0.992125  | -2.092707 | 3.391451  |
| C | -3.535319 | -1.580659 | 1.224626  |
| C | 2.8638    | -1.767207 | 2.420646  |
| H | 3.417047  | -1.670524 | 3.348862  |
| C | 0.735199  | -2.038121 | -1.249111 |
| C | 3.535404  | -1.58075  | 1.224518  |
| C | -6.509805 | 0.271193  | -0.000775 |
| C | -2.863671 | -1.767046 | 2.420739  |
| H | -3.416874 | -1.670284 | 3.348974  |
| C | -1.483669 | -2.004002 | -2.427741 |
| H | -0.992057 | -2.098086 | -3.388978 |
| C | -8.759513 | 1.12716   | -0.00162  |
| H | -9.830911 | 0.952485  | -0.001472 |
| C | -8.258739 | 2.427264  | -0.002865 |
| H | -8.943043 | 3.27145   | -0.003712 |
| C | -1.483597 | -1.99999  | 2.430114  |
| H | -0.991971 | -2.092547 | 3.391494  |
| C | 1.483607  | -2.003901 | -2.427795 |
| H | 0.991964  | -2.097979 | -3.389018 |
| C | -4.933215 | -1.082451 | 1.249032  |
| C | 6.000859  | 1.5892    | -0.001263 |
| C | 7.875088  | 0.042844  | -0.001556 |
| H | 8.239587  | -0.979232 | -0.001255 |

|   |           |           |           |
|---|-----------|-----------|-----------|
| C | 1.427149  | -1.955254 | 0.001103  |
| C | -3.916113 | 2.893148  | -0.002053 |
| H | -4.169311 | 3.484818  | 0.888781  |
| H | -4.165913 | 3.482789  | -0.895207 |
| C | 6.880382  | 2.670755  | -0.002465 |
| H | 6.501838  | 3.687689  | -0.002857 |
| C | 8.258667  | 2.427337  | -0.003168 |
| H | 8.942927  | 3.271559  | -0.004097 |
| C | 8.759507  | 1.127258  | -0.002709 |
| H | 9.830914  | 0.952638  | -0.003282 |
| C | -2.460791 | 2.429611  | 0.001264  |
| H | -2.338322 | 1.77653   | -0.872303 |
| H | -2.340404 | 1.781612  | 0.878908  |
| C | -1.330823 | 3.470616  | -0.000678 |
| H | -1.39765  | 4.118269  | -0.885923 |
| H | -1.400417 | 4.125037  | 0.879353  |
| C | 3.916048  | 2.893047  | -0.001091 |
| H | 4.166135  | 3.482263  | -0.894441 |
| H | 4.168955  | 3.48513   | 0.889553  |
| C | 2.460735  | 2.429512  | 0.002014  |
| H | 2.338431  | 1.776221  | -0.871418 |
| H | 2.340137  | 1.781737  | 0.879791  |
| C | -0.000026 | 2.699196  | 0.004272  |
| H | 0.000057  | 2.02678   | -0.865955 |
| H | -0.000135 | 2.037042  | 0.88232   |
| C | 1.330799  | 3.470562  | -0.000404 |
| H | 1.397899  | 4.118081  | -0.885728 |
| H | 1.400186  | 4.125105  | 0.879551  |

Negative frequency = zero

Sum of electronic and thermal free energies = -2217.032475 Hartree

**Table S8.** Cartesian coordinate and geometry of **5a+CH<sub>3</sub>CH<sub>3</sub>**.

|   |           |           |           |
|---|-----------|-----------|-----------|
| O | -7.461078 | -1.006329 | 0.000235  |
| O | 7.142053  | 0.735386  | -0.000094 |
| O | -5.740397 | 1.009149  | -2.289423 |
| O | -5.740214 | 1.010575  | 2.289107  |
| N | 5.419825  | -1.341834 | 0.000121  |
| C | -3.658487 | 0.595929  | -1.224093 |
| O | 5.422029  | -1.281999 | -2.289171 |
| O | 5.422102  | -1.281099 | 2.289389  |
| N | -5.737918 | 1.070418  | -0.000177 |
| C | -2.960862 | 0.451682  | -0.000096 |
| C | 3.340232  | -0.868211 | -1.223903 |
| C | 2.642664  | -0.723338 | 0.000044  |
| C | -0.879018 | 0.014089  | -1.250074 |
| C | -8.039856 | 0.223902  | 0.000005  |
| C | 6.839577  | -1.590852 | 0.000149  |
| C | 7.979659  | 1.892285  | -0.000152 |
| H | 8.625842  | 1.882933  | 0.889492  |
| H | 8.625906  | 1.8828    | -0.889748 |
| C | 7.721424  | -0.494496 | 0.00004   |
| C | -8.298473 | -2.162767 | 0.000385  |
| H | -8.944786 | -2.154658 | -0.889343 |
| H | -8.944799 | -2.154424 | 0.890104  |
| C | 3.340278  | -0.867701 | 1.224025  |
| C | -1.610135 | 0.164304  | -2.430073 |
| H | -1.121971 | 0.05988   | -3.391708 |
| C | 9.579438  | -2.045605 | 0.000201  |
| H | 10.653037 | -2.214088 | 0.000222  |
| C | -3.658391 | 0.596684  | 1.223867  |
| C | 0.560744  | -0.28647  | -1.250035 |
| C | 1.243051  | -0.42979  | 0.00001   |
| C | -7.157576 | 1.319865  | -0.000201 |
| C | -0.878934 | 0.01479   | 1.249986  |
| C | -2.979315 | 0.451946  | 2.420854  |
| H | -3.53075  | 0.56493   | 3.348234  |
| C | -9.418242 | 0.462836  | -0.000026 |
| H | -10.11928 | -0.363469 | 0.000129  |
| C | 9.099906  | -0.733046 | 0.00007   |
| H | 9.800702  | 0.093453  | -0.000017 |
| C | 2.661272  | -0.72242  | 2.420977  |
| H | 3.212768  | -0.834954 | 3.348374  |
| C | -1.609951 | 0.165767  | 2.429951  |
| H | -1.121708 | 0.061949  | 3.391612  |
| C | -5.111135 | 0.899516  | 1.249273  |
| C | 4.793064  | -1.170473 | 1.249487  |
| C | 0.560806  | -0.285879 | 1.25002   |
| C | -1.561254 | 0.158089  | -0.000061 |
| C | -9.020741 | 2.857491  | -0.000447 |
| H | -9.398091 | 3.875303  | -0.000617 |
| C | 8.703221  | -3.127866 | 0.000305  |
| H | 9.080922  | -4.145549 | 0.000408  |
| C | -5.111236 | 0.898738  | -1.24957  |
| C | 4.793022  | -1.170972 | -1.249294 |
| C | -7.644719 | 2.61946   | -0.000422 |

|   |            |           |           |
|---|------------|-----------|-----------|
| H | -6.936766  | 3.44275   | -0.000572 |
| C | 2.661181   | -0.723425 | -2.420889 |
| H | 3.212648   | -0.836318 | -3.348259 |
| C | -9.897349  | 1.775547  | -0.000252 |
| H | -10.970887 | 1.944389  | -0.000271 |
| C | 7.327118   | -2.890284 | 0.000277  |
| H | 6.619428   | -3.713803 | 0.000357  |
| C | 1.291893   | -0.436272 | 2.430012  |
| H | 0.803702   | -0.33201  | 3.391653  |
| C | -2.979506  | 0.450453  | -2.421044 |
| H | -3.531019  | 0.562843  | -3.348449 |
| C | 1.291795   | -0.437319 | -2.429991 |
| H | 0.803569   | -0.333447 | -3.391656 |
| C | 7.07684    | 3.117879  | -0.000275 |
| H | 6.423514   | 3.07233   | -0.881171 |
| H | 6.423413   | 3.072425  | 0.880551  |
| C | 7.869377   | 4.431451  | -0.0003   |
| H | 8.528839   | 4.461419  | 0.878538  |
| H | 8.529027   | 4.461276  | -0.879003 |
| C | -7.39581   | -3.388644 | 0.000551  |
| H | -6.743651  | -3.342117 | -0.879994 |
| H | -6.743426  | -3.34168  | 0.880907  |
| C | -8.196451  | -4.694683 | 0.000981  |
| H | -7.527273  | -5.561208 | 0.000899  |
| H | -8.838496  | -4.771557 | 0.886833  |
| H | -8.83903   | -4.771826 | -0.884465 |
| C | 6.965526   | 5.66849   | -0.000498 |
| H | 6.3179     | 5.685593  | 0.884346  |
| H | 7.555423   | 6.591751  | -0.000499 |
| H | 6.318108   | 5.685459  | -0.885497 |

Negative frequency = zero

Sum of electronic and thermal free energies = -2218.256126 Hartree

**Table S9.** Cartesian coordinate and geometry of **5b+CH<sub>3</sub>CH<sub>3</sub>**.

|   |            |           |           |
|---|------------|-----------|-----------|
| O | 7.323942   | 0.654976  | 0.000139  |
| O | -7.323815  | -0.655177 | 0.000015  |
| O | 5.544969   | -1.309376 | -2.289395 |
| O | 5.544853   | -1.310072 | 2.289145  |
| N | -5.540967  | 1.370182  | -0.000004 |
| C | 3.476231   | -0.834671 | -1.22407  |
| O | -5.544999  | 1.310145  | -2.289282 |
| O | -5.545038  | 1.309776  | 2.289264  |
| N | 5.540803   | -1.370158 | -0.000135 |
| C | 2.783185   | -0.669704 | -0.000098 |
| C | -3.476297  | 0.835204  | -1.223994 |
| C | -2.783291  | 0.669953  | -0.000037 |
| C | 0.715111   | -0.171159 | -1.250101 |
| C | 7.86656    | -0.591552 | -0.000001 |
| C | -6.952732  | 1.661071  | 0.000009  |
| C | -8.195239  | -1.786801 | 0.000045  |
| H | -8.840882  | -1.75826  | 0.889674  |
| H | -8.840908  | -1.758289 | -0.889565 |
| C | -7.866609  | 0.591278  | 0.00002   |
| C | 8.195536   | 1.786465  | 0.000235  |
| H | 8.841202   | 1.7579    | -0.889375 |
| H | 8.841174   | 1.757776  | 0.889863  |
| C | -3.476322  | 0.834986  | 1.223935  |
| C | 1.441445   | -0.343123 | -2.430082 |
| H | 0.956526   | -0.224582 | -3.391725 |
| C | -9.677981  | 2.196579  | 0.000033  |
| H | -10.746128 | 2.396735  | 0.000045  |
| C | 3.476172   | -0.835029 | 1.223859  |
| C | -0.715163  | 0.17175   | -1.250086 |
| C | -1.392935  | 0.335259  | -0.000052 |
| C | 6.952533   | -1.661218 | -0.000143 |
| C | 0.71506    | -0.171483 | 1.249951  |
| C | 2.801677   | -0.67022  | 2.420834  |
| H | 3.349555   | -0.799329 | 3.348216  |
| C | 9.237364   | -0.870883 | -0.000006 |
| H | 9.962341   | -0.065489 | 0.0001    |
| C | -9.237455  | 0.87042   | 0.000037  |
| H | -9.962319  | 0.064927  | 0.000056  |
| C | -2.801859  | 0.669938  | 2.420894  |
| H | -3.349766  | 0.79884   | 3.348287  |
| C | 1.441334   | -0.34381  | 2.429917  |
| H | 0.956367   | -0.225554 | 3.391571  |
| C | 4.919371   | -1.180609 | 1.249271  |
| C | -4.919534  | 1.180509  | 1.249378  |
| C | -0.715199  | 0.171488  | 1.249966  |
| C | 1.392835   | -0.334981 | -0.000083 |
| C | 8.769736   | -3.252866 | -0.000286 |
| H | 9.117061   | -4.281313 | -0.000395 |
| C | -8.770152  | 3.252467  | 0.000015  |
| H | -9.11762   | 4.280866  | 0.000009  |
| C | 4.919435   | -1.180231 | -1.249513 |
| C | -4.91951   | 1.180719  | -1.249406 |
| C | 7.401281   | -2.974546 | -0.000283 |

|   |           |           |           |
|---|-----------|-----------|-----------|
| H | 6.669466  | -3.776703 | -0.00039  |
| C | -2.801808 | 0.670368  | -2.420968 |
| H | -3.3497   | 0.79942   | -3.34835  |
| C | 9.677708  | -2.197105 | -0.000148 |
| H | 10.745829 | -2.397402 | -0.000149 |
| C | -7.401662 | 2.974338  | 0.000003  |
| H | -6.669959 | 3.776597  | -0.000009 |
| C | -1.44151  | 0.343551  | 2.429947  |
| H | -0.956569 | 0.225099  | 3.391591  |
| C | 2.801794  | -0.669513 | -2.421029 |
| H | 3.34972   | -0.798337 | -3.348422 |
| C | -1.441454 | 0.344004  | -2.430051 |
| H | -0.956495 | 0.225718  | -3.391706 |
| C | -7.329076 | -3.038564 | 0.000047  |
| H | -6.674705 | -3.012476 | -0.880865 |
| H | -6.674573 | -3.012377 | 0.880857  |
| C | -8.160187 | -4.328081 | 0.000186  |
| H | -8.820205 | -4.338393 | 0.879058  |
| H | -8.82048  | -4.338419 | -0.878479 |
| C | 7.32956   | 3.038357  | 0.000301  |
| H | 6.67525   | 3.012455  | -0.880662 |
| H | 6.674988  | 3.012174  | 0.88106   |
| C | 8.16086   | 4.327753  | 0.000642  |
| H | 8.820794  | 4.337886  | 0.879578  |
| H | 8.82124   | 4.338087  | -0.877959 |
| C | -7.293397 | -5.591355 | 0.000066  |
| H | -6.646514 | -5.627553 | 0.884877  |
| H | -7.910391 | -6.49673  | 0.000191  |
| H | -6.646816 | -5.62759  | -0.884964 |
| C | 7.294246  | 5.591149  | 0.000557  |
| H | 6.647767  | 5.627564  | -0.88454  |
| H | 6.647272  | 5.627344  | 0.885301  |
| H | 7.911364  | 6.49644   | 0.000845  |

Negative frequency = zero

Sum of electronic and thermal free energies = -2257.543294 Hartree

**Table S10.** Cartesian coordinate and geometry of **5c+CH<sub>3</sub>CH<sub>3</sub>**.

|   |            |           |           |
|---|------------|-----------|-----------|
| O | 7.530352   | 0.518102  | -0.001002 |
| O | -7.160304  | -0.225245 | -0.001152 |
| O | 5.676285   | -1.373451 | -2.287579 |
| O | 5.675351   | -1.377835 | 2.29094   |
| N | -5.298905  | 1.728396  | 0.002455  |
| C | 3.627146   | -0.820332 | -1.222179 |
| O | -5.304556  | 1.671477  | -2.286898 |
| O | -5.306074  | 1.664964  | 2.291633  |
| N | 5.669348   | -1.435874 | 0.001614  |
| C | 2.940708   | -0.629946 | 0.001832  |
| C | -3.2561    | 1.115519  | -1.221698 |
| C | -2.570324  | 0.92215   | 0.002214  |
| C | 0.893509   | -0.051334 | -1.248051 |
| C | 8.023791   | -0.748692 | 0.000032  |
| C | -6.698146  | 2.074576  | 0.00248   |
| C | -8.075774  | -1.321719 | -0.003322 |
| H | -8.720064  | -1.269121 | 0.886138  |
| H | -8.719388  | -1.266161 | -0.89309  |
| C | -7.653462  | 1.041601  | 0.000579  |
| C | 8.445555   | 1.614609  | -0.003713 |
| H | 9.088829   | 1.559161  | -0.893781 |
| H | 9.090339   | 1.562313  | 0.885459  |
| C | -3.256886  | 1.112127  | 1.226215  |
| C | 1.612907   | -0.250126 | -2.428071 |
| H | 1.133034   | -0.112346 | -3.389683 |
| C | -9.400139  | 2.717087  | 0.002491  |
| H | -10.459569 | 2.959195  | 0.002483  |
| C | 3.626622   | -0.822797 | 1.225752  |
| C | -0.522508  | 0.346384  | -1.247953 |
| C | -1.193847  | 0.534305  | 0.002118  |
| C | 7.06864    | -1.781803 | 0.001503  |
| C | 0.892909   | -0.054079 | 1.252     |
| C | 2.958705   | -0.633304 | 2.422763  |
| H | 3.501052   | -0.78412  | 3.350122  |
| C | 9.382642   | -1.081388 | -0.000167 |
| H | 10.13855   | -0.304955 | -0.001365 |
| C | -9.012257  | 1.374597  | 0.000602  |
| H | -9.768308  | 0.598306  | -0.00084  |
| C | -2.589629  | 0.919743  | 2.423128  |
| H | -3.132463  | 1.068396  | 3.350549  |
| C | 1.61185    | -0.255073 | 2.431925  |
| H | 1.131591   | -0.119135 | 3.393606  |
| C | 5.055474   | -1.223588 | 1.251086  |
| C | -4.685717  | 1.513049  | 1.251729  |
| C | -0.523228  | 0.34321   | 1.252095  |
| C | 1.564203   | -0.242187 | 0.001927  |
| C | 8.822236   | -3.443261 | 0.002811  |
| H | 9.129108   | -4.484495 | 0.003926  |
| C | -8.45141   | 3.736377  | 0.004366  |
| H | -8.758085  | 4.777669  | 0.005827  |
| C | 5.055986   | -1.221131 | -1.247697 |
| C | -4.684892  | 1.516589  | -1.247018 |
| C | 7.465711   | -3.11168  | 0.002923  |

|   |           |           |           |
|---|-----------|-----------|-----------|
| H | 6.703106  | -3.884623 | 0.004096  |
| C | -2.588079 | 0.926442  | -2.41871  |
| H | -3.130292 | 1.077762  | -3.346064 |
| C | 9.770783  | -2.423806 | 0.001222  |
| H | 10.830255 | -2.665723 | 0.001072  |
| C | -7.094951 | 3.404531  | 0.004347  |
| H | -6.332193 | 4.177325  | 0.005781  |
| C | -1.242794 | 0.541419  | 2.432108  |
| H | -0.763055 | 0.403181  | 3.393721  |
| C | 2.959725  | -0.628492 | -2.419093 |
| H | 3.502436  | -0.777562 | -3.346521 |
| C | -1.241282 | 0.547986  | -2.427873 |
| H | -0.760919 | 0.412438  | -3.389558 |
| C | -7.259538 | -2.60663  | -0.005134 |
| H | -6.604278 | -2.603846 | -0.885667 |
| H | -6.605113 | -2.606874 | 0.876027  |
| C | -8.141272 | -3.861838 | -0.007709 |
| H | -8.802936 | -3.849126 | 0.871107  |
| H | -8.801872 | -3.846253 | -0.887276 |
| C | 7.629268  | 2.899447  | -0.005277 |
| H | 6.973465  | 2.897416  | -0.885506 |
| H | 6.975151  | 2.900695  | 0.876211  |
| C | 8.510466  | 4.155265  | -0.008429 |
| H | 9.17145   | 4.141171  | 0.869666  |
| H | 9.169587  | 4.138055  | -0.887866 |
| C | -7.332065 | -5.165462 | -0.009347 |
| H | -6.67203  | -5.181516 | 0.869253  |
| H | -6.670925 | -5.178629 | -0.887164 |
| C | 7.694078  | 5.451672  | -0.00986  |
| H | 7.048321  | 5.511753  | -0.894193 |
| H | 7.050229  | 5.514907  | 0.875644  |
| H | 8.346242  | 6.332051  | -0.01213  |
| C | -8.211737 | -6.419492 | -0.011961 |
| H | -7.605316 | -7.332203 | -0.01308  |
| H | -8.859921 | -6.451456 | 0.872451  |
| H | -8.858809 | -6.448547 | -0.897288 |

Negative frequency = zero

Sum of electronic and thermal free energies = -2296.830740 Hartree



**Table S11.** Cartesian coordinate and geometry of ethane.

|   |           |           |           |
|---|-----------|-----------|-----------|
| C | 0         | 0         | 0.765306  |
| H | -0.510273 | 0.884352  | 1.16449   |
| H | 1.021008  | -0.000267 | 1.16449   |
| H | -0.510735 | -0.884085 | 1.16449   |
| C | 0         | 0         | -0.765306 |
| H | 0.510735  | -0.884085 | -1.16449  |
| H | -1.021008 | -0.000267 | -1.16449  |
| H | 0.510273  | 0.884352  | -1.16449  |

Negative frequency = zero

Sum of electronic and thermal free energies =  $-79.776601$  Hartree

## 9. Photophysical properties

**Method to determine quantum yields of the triplet generations:** To obtain quantum yields of the intersystem crossings (ISC), we conducted transient absorption (TA) spectroscopic analysis of **5b** and **5c** (Figure SX). The nanosecond transient absorption data were obtained using a nanosecond time-resolved optical absorption spectrometer system (UNISOKU, TSP-1000-KK) at room temperature. For the light excitation of 532 nm light, a Nd: YAG laser (Continuum Minilite II, fwhm = 5 ns, pulse energy = 0.3 mJ/pulse, pulse repetition frequency = 10 Hz) was employed. The excitation wavelength was the second harmonics (532 nm) of the 1064 nm pump laser. The sample solutions were deoxygenated by the freeze-pump-thaw cycle in the CH<sub>2</sub>Cl<sub>2</sub> solutions.

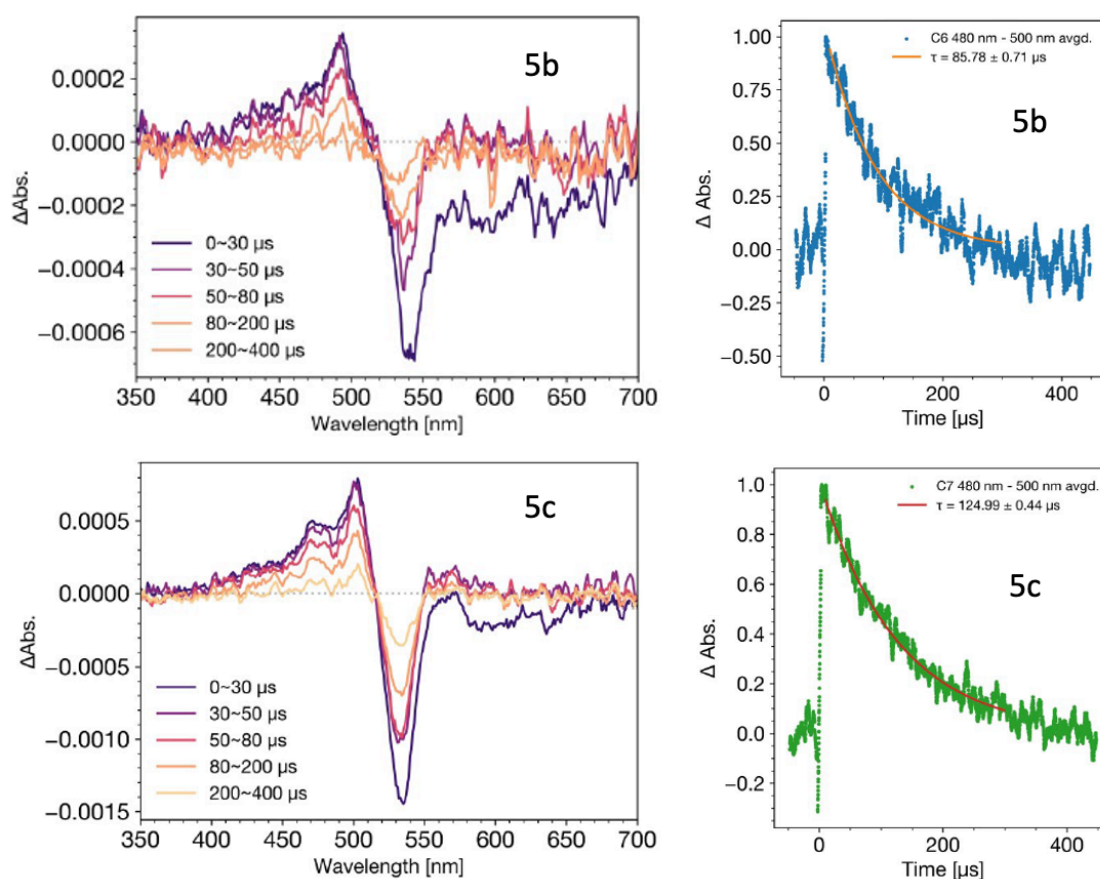

**Figure S477.** TA spectra of **5b** and **5c** by the 532 nm laser irradiations. Time profiles of the absorbance changes in the 480–500 nm regions are shown in the right panels.

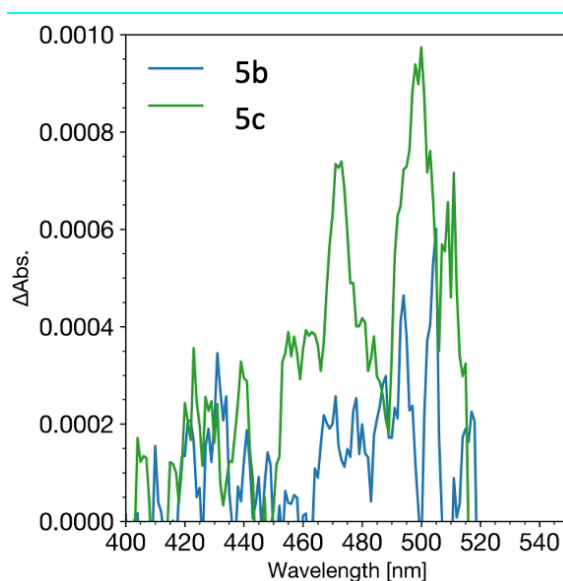

**Figure S488.** TA spectra of **5b** and **5c** at 1  $\mu$ s after the 532 nm laser irradiations.

The TA spectra in Figure S47 are almost identical with the reported TA spectra<sup>5</sup> of the excited triplet states of **3'''**. Thus, these bands originate from the triplet exatons generated by the ISC.

The optical densities of the 532 nm absorptions are determined from the light pathlengths of  $l = 0.1$  [cm] in the UV-VIS measurements and the actual path (0.45 cm) employed with the TA measurements. The absorbances were  $A_{532} = 0.1128$  (**5b**) and 0.1259 (**5c**) in the UV-VIS. Thus, for the TA experimental setups, the following absorbances were obtained:

$$A_{532nm,5b} = 0.56655$$

$$A_{532nm,5c} = 0.5076$$

The  $S_1$  state concentration [ $S_1$ ] is determined using the numbers (mol) of the laser photons ( $N_{Ph} = 8.0346... \times 10^{14}$ ) per pulse and the rate of the absorption ( $1 - 10^{-A_{532nm}}$ ) by the followings:

$$N_{S1,5b} = \frac{N_{Ph} \times (1 - 10^{-A_{532nm,5b}})}{N_A} = \frac{8.0346... \times 10^{14} \times (1 - 10^{-0.56655})}{6.022 \times 10^{23} [mol^{-1}]}$$

$$= 9.7256024... \times 10^{-10} [mol]$$

$$N_{S1,5c} = \frac{N_{Ph} \times (1 - 10^{-A_{532nm,5c}})}{N_A} = \frac{8.0346... \times 10^{14} \times (1 - 10^{-0.5076})}{6.022 \times 10^{23} [mol^{-1}]}$$

$$= 9.1991906... \times 10^{-10} [mol]$$

$[S_1]$  is thus obtained as,

$$[S_1]_{5b} = N_{S_1,5b}/V = 3.05754 \dots \times 10^{-5} [M]$$

$$[S_1]_{5c} = N_{S_1,5c}/V = 2.89204 \dots \times 10^{-5} [M]$$

where irradiation volume ( $V$ ) is estimated from the irradiation path ( $0.45 [cm]$ ) and the radius of the laser spot, as,  $V = \pi r^2 l = \pi \times 0.15 [cm] \times 0.15 [cm] \times 0.45 [cm] = 3.18086 \dots \times 10^{-5} [L^{-1}]$ .

From Figure S49, the absorbance peak tops around 500 nm are  $Abs. (T1)_{5b} = 0.0005$  and  $Abs. (T1)_{5c} = 0.001$ , respectively. Using the reported difference of the molar excitation coefficients ( $\varepsilon_T - \varepsilon_{S_0}$ )  $\approx 40000 [M^{-1} cm^{-1}]$  between the triplet state and the ground state absorption<sup>5</sup>, the triplet concentrations are estimated as follows:

$$[T]_{5b} = \frac{Abs. (TT)_{5b}}{(\varepsilon_T - \varepsilon_{S_0}) \times l} = \frac{0.0005}{40000 \times 0.45 [cm]} = 2.8 \times 10^{-8} [M]$$

$$[T]_{5c} = \frac{Abs. (TT)_{5c}}{(\varepsilon_T - \varepsilon_{S_0}) \times l} = \frac{0.001}{40000 \times 0.45 [cm]} = 5.6 \times 10^{-8} [M]$$

Thus, the triplet yields in Table 2 are estimated as follows:

$$\Phi_{T,5b} = \frac{[T]_{5b}}{[S_1]_{5b}} = \frac{2.8 \times 10^{-8} [M]}{3.05754 \dots \times 10^{-5} [M]} \approx 0.0009$$

$$\Phi_{T,5c} = \frac{[T]_{5c}}{[S_1]_{5c}} = \frac{5.6 \times 10^{-8} [M]}{2.89204 \dots \times 10^{-5} [M]} \approx 0.0019$$

## 10. References

---

1. Gaussian 16, Revision B.01, M. J. Frisch, G. W. Trucks, H. B. Schlegel, G. E. Scuseria, M. A. Robb, J. R. Cheeseman, G. Scalmani, V. Barone, G. A. Petersson, H. Nakatsuji, X. Li, M. Caricato, A. V. Marenich, J. Bloino, B. G. Janesko, R. Gomperts, B. Mennucci, H. P. Hratchian, J. V. Ortiz, A. F. Izmaylov, J. L. Sonnenberg, D. Williams-Young, F. Ding, F. Lipparini, F. Egidi, J. Goings, B. Peng, A. Petrone, T. Henderson, D. Ranasinghe, V. G. Zakrzewski, J. Gao, N. Rega, G. Zheng, W. Liang, M. Hada, M. Ehara, K. Toyota, R. Fukuda, J. Hasegawa, M. Ishida, T. Nakajima, Y. Honda, O. Kitao, H. Nakai, T. Vreven, K. Throssell, J. A. Montgomery, Jr., J. E. Peralta, F. Ogliaro, M. J. Bearpark, J. J. Heyd, E. N. Brothers, K. N. Kudin, V. N. Staroverov, T. A. Keith, R. Kobayashi, J. Normand, K. Raghavachari, A. P. Rendell, J. C. Burant, S. S. Iyengar, J. Tomasi, M. Cossi, J. M. Millam, M. Klene, C. Adamo, R. Cammi, J. W. Ochterski, R. L. Martin, K. Morokuma, O. Farkas, J. B. Foresman, and D. J. Fox, Gaussian, Inc., Wallingford CT, **2016**.
2. (a) Becke, A. D. *Phys. Rev. A* **1988**, *38*, 3098. (b) Lee, C.; Yang, W.; Parr, R. G. *Phys. Rev. B* **1988**, *37*, 785.
3. Tanaka, Y.; Tajima, K.; Fukui, N.; Shinokubo, H. *Asian J. Org. Chem.* **2021**, *10*, 541
4. Uersfeld, D.; Stappert, S.; Li, C.; Müllen, K. *Adv. Synth. Catal.* **2017**, *359*, 4184.
5. Ford, W. E.; Kamat, P. V. *J. Phys. Chem.* **1987**, *91*, 6373.
